# Supplementary material for: Synthesis of 3-halogenated 2,3′-biindoles by a copper-mediated 2,3-difunctionalization of indoles
Source: Royal Society of Chemistry journal article supplement (doi:10.1039/d1ob02024b), 2021-01-01

# Electronic Supplementary Information

## Synthesis of 3-halogenated 2,3'-biindoles by a copper-mediated 2,3-difunctionalization of indoles

Xiaoxiang Zhang,<sup>a</sup> Yingying Zhang,<sup>a</sup> Xiaoting Gu,<sup>a</sup> Zhuan Zhang,<sup>a</sup> Wanxing Wei<sup>\*,a</sup> and Taoyuan Liang<sup>\*,a</sup>

<sup>a</sup> Guangxi Key Laboratory of Electrochemical Energy Materials, School of Chemistry and Chemical Engineering, Guangxi University, Nanning, Guangxi 530004, People's Republic of China.

\*E-mail: wxwei@gxu.edu.cn, taoyuanliang@gxu.edu.cn

### Table of contents

|                                               |         |
|-----------------------------------------------|---------|
| 1. General information.                       | S2      |
| 2. Substrates preparation.                    | S2-S3   |
| 3. Optimization of reaction conditions.       | S3-S4   |
| 4. Typical procedure for the synthesis of B1. | S4-S5   |
| 5. Synthetic utility.                         | S5-S6   |
| 6. Control experiments.                       | S6-S7   |
| 7. Single crystal X-ray diffraction of B1.    | S7-S11  |
| 8. References.                                | S11     |
| 9. Analytical data of the obtained compounds. | S12-S29 |
| 10. NMR spectra of the obtained compounds.    | S30-S68 |

## 1. General information.

All the obtained products were characterized by melting points (m.p.), <sup>1</sup>H-NMR, <sup>13</sup>C-NMR. Melting points were measured on an Electrothermal SGW-X4 microscopy digital melting point apparatus and are uncorrected; <sup>1</sup>H-NMR and <sup>13</sup>C-NMR spectra were obtained on Bruker-400/500 and referenced to 7.26 ppm for chloroform solvent with TMS as internal standard (0 ppm). Chemical shifts were reported in parts per million (ppm, δ) downfield from tetramethylsilane. Proton coupling patterns are described as singlet (s), doublet (d), triplet (t), multiplet (m); TLC was performed using commercially prepared 100-400 mesh silica gel plates (GF254), and visualization effected at 254 nm; Unless otherwise stated, all the reagents were purchased from commercial sources, used without further purification.

All the reagents were purchased from Bide Pharmatech Ltd. and Energy Chemical. All solvents were purchased from Greagent (Shanghai Titansci incorporated company) and used without further purification. All reactions were heated by metal sand bath (WATTCAS, LAB-500, <https://www.wattcas.com>). Column chromatography was performed on silica gel (200-300 mesh). Reactions were monitored by using thin layer chromatography (TLC) (Qingdao Jiyida silica gel reagent factory GF254).

## 2. Substrates preparation.

### General Procedure for the preparation of *N*-substituted indole derivatives (A2, A4-A34)<sup>1</sup>:

Procedure for 6-chloro-1-methyl-1*H*-indole (A12): To a suspended solution of NaH (0.55 g, 65% dispersion in mineral oil, 15.0 mmol) in DMF (5.0 mL), 6-chloro-1*H*-indole (1.51 g, 10.0 mmol) in DMF (5.0 mL) was added dropwise at 0 °C. The heterogeneous mixture was stirred at 0 °C for 15 min and 1 h at room temperature. The mixture was then cooled to 0 °C, treated with iodomethane (0.83 mL, 13.0 mmol), and allowed to warm to room temperature. After 30 min, the reaction mixture was cooled to 0 °C, quenched with saturated NH<sub>4</sub>Cl (20.0 mL), and extracted with ether (3 × 20.0 mL). The organic layers were combined, washed with brine, dried over anhydrous

Na<sub>2</sub>SO<sub>4</sub> and concentrated in vacuo. The resulting oil was purified by column chromatography on silica gel (petroleum ether) afforded **A12** as a yellow oil. Similarly, the other *N*-substituted indole derivatives were prepared from their corresponding indoles and halides.

### 3. Optimization of reaction conditions.

**Table S1. Optimization of the reaction conditions. <sup>a</sup>**

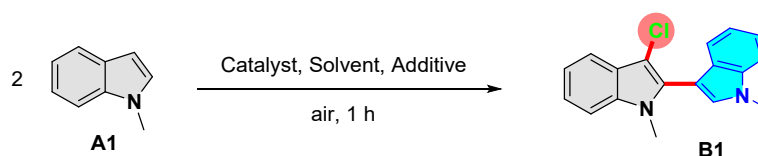

| Entry | Catalyst             | Solvent      | Additive           | Isolated yield of <b>B1</b> (%) |
|-------|----------------------|--------------|--------------------|---------------------------------|
| 1.    | CuCl <sub>2</sub>    | acetonitrile | NCS                | 27                              |
| 2.    | CuCl                 | acetonitrile | NCS                | <5                              |
| 3.    | CuBr                 | acetonitrile | NCS                | 0                               |
| 4.    | CuI                  | acetonitrile | NCS                | 15                              |
| 5.    | Cu(OAc) <sub>2</sub> | acetonitrile | NCS                | 20                              |
| 6.    | Cu(OTf) <sub>2</sub> | acetonitrile | NCS                | trace                           |
| 7.    | FeCl <sub>3</sub>    | acetonitrile | NCS                | 13                              |
| 8.    | CoCl <sub>2</sub>    | acetonitrile | NCS                | 22                              |
| 9.    | CuCl <sub>2</sub>    | 1,4-dioxane  | NCS                | 0                               |
| 10.   | CuCl <sub>2</sub>    | DMF          | NCS                | 16                              |
| 11.   | CuCl <sub>2</sub>    | DMSO         | NCS                | 19                              |
| 12.   | CuCl <sub>2</sub>    | acetone      | NCS                | 0                               |
| 13.   | CuCl <sub>2</sub>    | toluene      | NCS                | 0                               |
| 14.   | CuCl <sub>2</sub>    | acetonitrile | AlCl <sub>3</sub>  | 16                              |
| 15.   | CuCl <sub>2</sub>    | acetonitrile | NH <sub>4</sub> Cl | trace                           |
| 16.   | CuCl <sub>2</sub>    | acetonitrile | LiCl               | 10                              |
| 17.   | CuCl <sub>2</sub>    | acetonitrile |                    | (59, 67, 52) <sup>b</sup>       |
| 18.   | CuCl <sub>2</sub>    | acetonitrile |                    | 54 <sup>c</sup>                 |

<sup>a</sup> Conditions: unless otherwise stated, all the reactions were performed with **A1** (0.5 mmol), catalyst (20 mol%), additive (1.0 equiv.), solvent (3.0 mL) at room temperature under air for 1 h; <sup>b</sup> 100 mol%, 120 mol% and 150 mol% of catalysts were used respectively; <sup>c</sup> The reaction was performed for 2 h and 120 mol% of catalyst was used.

#### 4. Typical procedure for the synthesis of B1.

The mixture of 1-methylindole **A1** (65.5 mg, 0.5 mmol), CuCl<sub>2</sub> (81.0 mg, 0.6 mmol) in acetonitrile (1.5 mL) was stirred at room temperature for 1 h under air. The resulting mixture was concentrated by removing the solvent under vacuum, and the residue was purified by preparative TLC on silica gel by using petroleum ether/ethyl acetate (20 :1) as the eluent to give **B1** as a yellow solid (49.2 mg, 67% yield).

**Scheme S1. Substrates employed for the synthesis of 3-halogenated 2,3'-biindoles.**

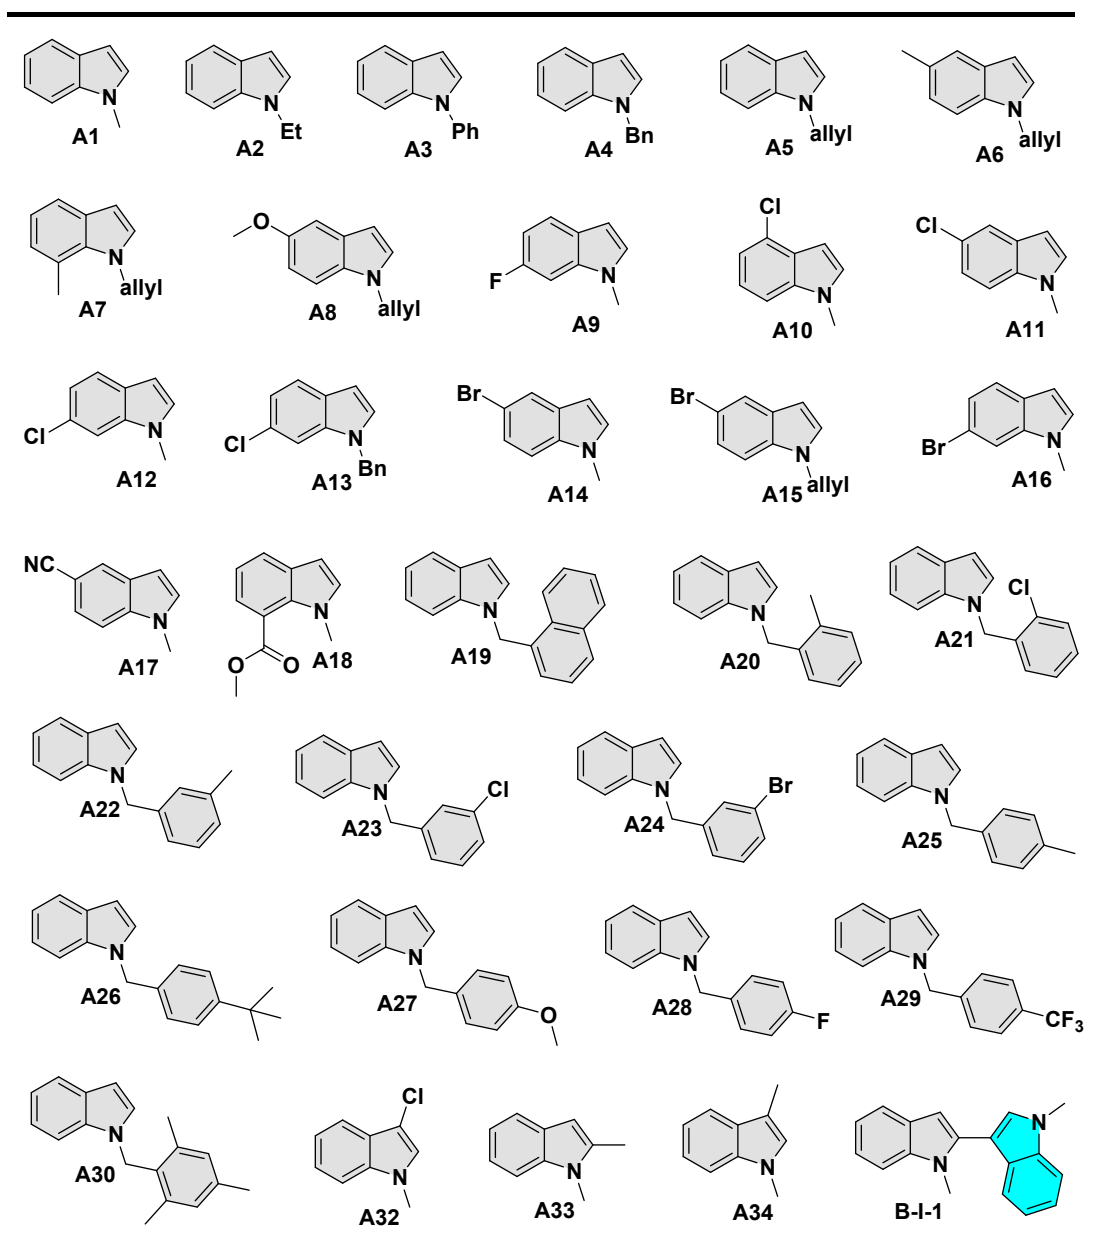

## 5. Synthetic utility.

The mixture of 3-bromo-1,1'-dimethyl-1*H*,1'*H*-2,3'-biindole **B31** (84.5 mg, 0.25 mmol), (4-(diphenylamino)phenyl)boronic acid (108.0 mg, 0.37 mmol), and Na<sub>2</sub>CO<sub>3</sub> (53.0 mg, 0.50 mmol) in toluene: water: ethanol (3 : 2 : 1) was stirred at 125 °C for 18 h under N<sub>2</sub>. The resulting mixture was concentrated by removing the solvent under vacuum, and the residue was purified by preparative TLC on silica gel by using petroleum ether/ethyl acetate (20 : 1) as the eluent to give **F** as a yellow solid, (35.0 mg, 28% yield).

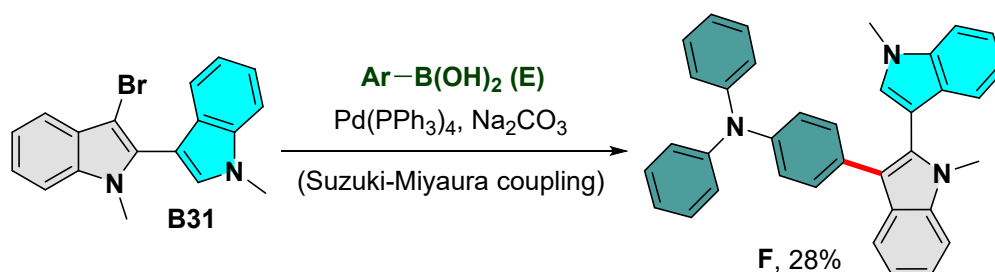

## 6. Control experiments.

(1) The preparation of **B-I-1** was similar to the literature procedures<sup>2</sup>. Under the optimized reaction conditions, the reaction of **B-I-1** (65.0 mg, 0.5 mmol) was carried. Then, the crude reaction mixture was analyzed by TLC, and only a trace of **B1** was observed.

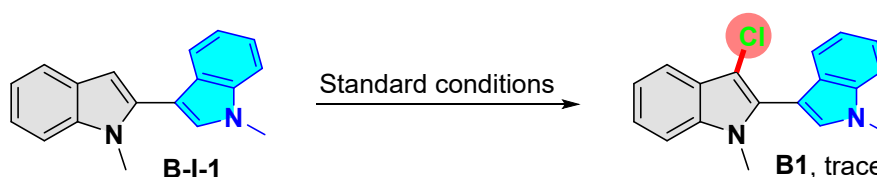

(2) The preparation of **A32** was similar to the literature procedures<sup>3</sup>. Under the optimized reaction conditions, the reaction of **A32** (41.3 mg, 0.25 mmol) and **A33** (36.3 mg, 0.25 mmol) was carried. Then, the reaction mixture was purified by preparative TLC on silica eluting with petroleum ether/ethyl acetate (20:1) to give product **B33** as white solid (26.2 mg, 34% yield) and product **B1** as yellow solid (14.0 mg, 19% yield).

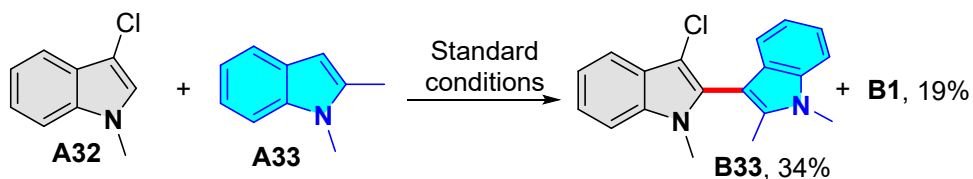

(3) Under the optimized reaction conditions, the reaction of **A34** (36.3 mg, 0.25 mmol) and **A33** (36.3 mg, 0.25 mmol) was carried. Then, the reaction mixture was purified by preparative TLC on silica eluting with petroleum ether/ethyl acetate (20:1) to give product **B34** as white solid (22.3mg, 31% yield).

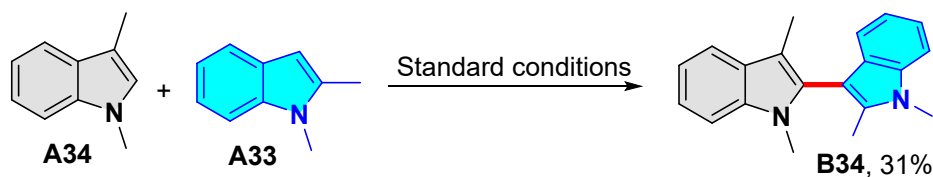

(4) Under the optimized reaction conditions, the model reaction was carried out by introducing 3.0 equivalent of TEMPO (2,2,6,6-tetramethyl-1-piperidinyloxy). Then, the reaction mixture was purified by preparative TLC on silica eluting with petroleum ether/ethyl acetate (20:1) to give product **B1** as yellow solid (44.8 mg, 61% yield).

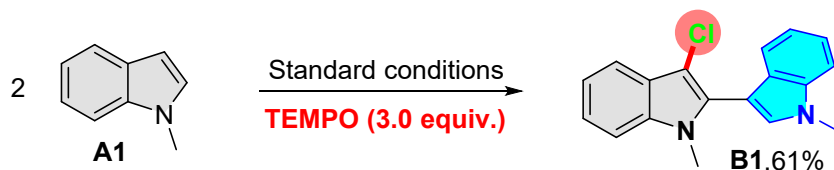

(5) Under the optimized reaction conditions, the model reaction was carried out by introducing 3.0 equivalent of BHT (2,6-di-tert-butyl-4-methylphenol). Then, the reaction mixture was purified by preparative TLC on silica eluting with petroleum ether/ethyl acetate (20:1) to give product **B1** as yellow solid (39.7 mg, 54% yield).

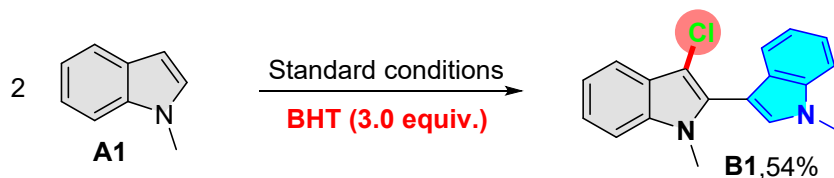

## 7. Single crystal X-ray diffraction of **B1**.

White block-like single crystals of **B1** were grown by layering a dichloromethane solution with *n*-hexane at ambient temperature. X-Ray diffraction data of one these

crystals were collected on a R-AXIS SPIDER diffractometer. The measurements were performed with Mo-K $\alpha$  radiation ( $\lambda = 0.71073 \text{ \AA}$ ). Data were collected at 293(2) K, using the  $\omega$ - and  $\varphi$ - scans to a maximum  $\theta$  value of 25.242°. The data were refined by full-matrix least-squares techniques on  $F^2$  with SHELXTL-2014. And the structures were solved by direct methods SHELXS-2014. All the non-hydrogen atoms were refined anisotropically. The hydrogen atoms were included at geometrically idealized positions. And an ORTEP representation of the structure is shown below.

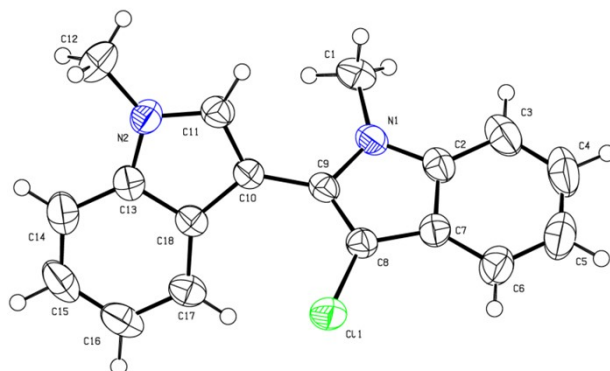

**Figure S1.** ORTEP drawing of **B1** with the numbering scheme.

**Table S2.** Crystal data and structure refinement for **B1**.

|                                     |                                                                  |                                |
|-------------------------------------|------------------------------------------------------------------|--------------------------------|
| Identification code                 | B1                                                               |                                |
| Empirical formula                   | $C_{18}H_{15}ClN_2$                                              |                                |
| Formula weight                      | 294.77                                                           |                                |
| Temperature                         | 293(2) K                                                         |                                |
| Crystal system                      | Monoclinic                                                       |                                |
| Space group                         | $P2_1/n$                                                         |                                |
| Unit cell dimensions                | $a = 13.1846(10) \text{ \AA}$                                    | $\square = 90^\circ$ .         |
|                                     | $b = 7.7958(7) \text{ \AA}$                                      | $\square = 113.389(9)^\circ$ . |
|                                     | $c = 15.6184(12) \text{ \AA}$                                    | $\square = 90^\circ$ .         |
| Volume                              | $1473.4(2) \text{ \AA}^3$                                        |                                |
| Z                                   | 4                                                                |                                |
| $\rho_{\text{calc}}$                | $1.329 \text{ cm}^3$                                             |                                |
| $\mu$                               | $0.253 \text{ mm}^{-1}$                                          |                                |
| F(000)                              | 616.0                                                            |                                |
| Crystal size                        | $0.22 \times 0.20 \times 0.18 \text{ mm}^3$                      |                                |
| Radiation                           | MoK $\alpha$ ( $\lambda = 0.71073$ )                             |                                |
| $2^\circ$ range for data collection | $7.372$ to $58.356^\circ$                                        |                                |
| Index ranges                        | $-16 \leq h \leq 12$ , $-5 \leq k \leq 9$ , $-19 \leq l \leq 19$ |                                |

|                                     |                                          |
|-------------------------------------|------------------------------------------|
| Reflections collected               | 6775                                     |
| Independent reflections             | 3375 [R(int) = 0.0292,R(sigma) = 0.0515] |
| Data / restraints / parameters      | 3375 / 0 / 192                           |
| Goodness-of-fit on F <sup>2</sup>   | 1.070                                    |
| Final R indices [I>=2 $\sigma$ (I)] | R1 = 0.0608, wR2 = 0.1305                |
| Final R indices (all data)          | R1 = 0.0887, wR2 = 0.1473                |
| Largest diff. peak and hole         | 0.27 and -0.36 e. $\text{\AA}^{-3}$      |

**Table S3.** Fractional Atomic Coordinates ( $\times 10^4$ ) and Equivalent Isotropic Displacement Parameters ( $\text{\AA}^2 \times 10^3$ ) for **B1**. U(eq) is defined as 1/3 of of the trace of the orthogonalised U<sup>ij</sup> tensor.

| Atom | x          | y         | z          | U(eq)    |
|------|------------|-----------|------------|----------|
| N2   | 9216.7(15) | 1892(3)   | 2641.7(14) | 43.6(5)  |
| C10  | 7394.7(17) | 1647(3)   | 2298.4(14) | 35.4(5)  |
| N1   | 6221.0(15) | 1240(3)   | 3199.6(12) | 40.0(5)  |
| C9   | 6341.4(17) | 1771(3)   | 2394.2(14) | 34.7(5)  |
| C2   | 5161.1(19) | 1609(3)   | 3108.0(16) | 41.9(6)  |
| C7   | 4579.1(18) | 2361(3)   | 2232.5(16) | 39.6(5)  |
| C18  | 7605.9(18) | 1081(3)   | 1503.4(15) | 35.7(5)  |
| C8   | 5344.1(18) | 2421(3)   | 1797.4(15) | 37.2(5)  |
| C13  | 8750.1(18) | 1250(3)   | 1752.8(16) | 39.4(5)  |
| C11  | 8401.8(18) | 2123(3)   | 2959.1(16) | 41.3(6)  |
| C17  | 6947(2)    | 454(3)    | 620.0(15)  | 44.4(6)  |
| C3   | 4663(2)    | 1355(4)   | 3736(2)    | 60.3(8)  |
| C1   | 7046(2)    | 434(4)    | 4012.2(15) | 49.6(6)  |
| C16  | 7438(2)    | 39(4)     | 15.2(17)   | 57.4(7)  |
| C12  | 10366(2)   | 2357(4)   | 3152(2)    | 61.7(8)  |
| C14  | 9245(2)    | 810(4)    | 1139.8(19) | 55.8(7)  |
| C4   | 3583(3)    | 1898(5)   | 3468(2)    | 73.1(10) |
| C6   | 3488(2)    | 2901(4)   | 1985(2)    | 55.5(7)  |
| C5   | 3007(2)    | 2671(5)   | 2610(2)    | 71.0(9)  |
| C15  | 8574(3)    | 215(4)    | 281.4(19)  | 63.3(8)  |
| C11  | 5071.8(5)  | 3368.9(9) | 732.7(4)   | 49.9(2)  |

**Table S4.** Anisotropic Displacement Parameters ( $\text{\AA}^2 \times 10^3$ ) for **B1**. The Anisotropic displacement factor exponent takes the form:  $-2\pi^2[h^2a^{*2}U_{11}+2hka^*b^*U_{12}+\dots]$ .



| Atom | U <sub>11</sub> | U <sub>22</sub> | U <sub>33</sub> | U <sub>23</sub> | U <sub>13</sub> | U <sub>12</sub> |
|------|-----------------|-----------------|-----------------|-----------------|-----------------|-----------------|
| N2   | 35.4(10)        | 46.2(13)        | 48.5(12)        | -3.3(10)        | 15.9(9)         | -1.5(9)         |
| C10  | 37.8(11)        | 35.2(13)        | 33.8(11)        | -0.2(10)        | 14.9(9)         | 0.9(9)          |
| N1   | 44.5(11)        | 44.8(13)        | 32.1(10)        | -0.9(9)         | 17.0(8)         | -1.2(9)         |
| C9   | 40.2(12)        | 34.7(13)        | 31.1(11)        | -4.2(9)         | 16.1(9)         | -4.9(10)        |
| C2   | 48.8(13)        | 39.2(14)        | 43.3(13)        | -9.3(11)        | 24.3(11)        | -10.1(11)       |
| C7   | 37.8(12)        | 39.3(14)        | 43.3(13)        | -11.0(11)       | 17.8(10)        | -9.1(10)        |
| C18  | 42.7(12)        | 30.3(12)        | 35.0(11)        | 3.7(9)          | 16.3(10)        | 2.7(9)          |
| C8   | 37.4(11)        | 39.2(14)        | 34.6(11)        | -3.6(10)        | 13.9(9)         | -4.0(10)        |
| C13  | 44.5(13)        | 34.2(13)        | 43.8(13)        | 6.4(10)         | 22.0(11)        | 5.1(10)         |
| C11  | 43.4(13)        | 41.9(15)        | 37.7(12)        | -5.0(10)        | 15.1(10)        | 0.2(10)         |
| C17  | 53.8(14)        | 39.3(15)        | 38.0(12)        | 1.4(11)         | 16.1(11)        | 2.1(11)         |
| C3   | 73.9(19)        | 65(2)           | 55.1(16)        | -9.4(14)        | 39.6(15)        | -14.6(15)       |
| C1   | 60.8(15)        | 49.9(17)        | 35.6(13)        | 4.9(12)         | 16.5(11)        | 3.0(13)         |
| C16  | 81(2)           | 55.2(19)        | 36.2(13)        | 0.6(12)         | 22.9(13)        | 14.7(15)        |
| C12  | 37.5(13)        | 65(2)           | 74.8(19)        | 3.1(16)         | 13.7(13)        | -5.0(13)        |
| C14  | 56.8(16)        | 60.3(19)        | 62.6(17)        | 14.3(14)        | 36.8(14)        | 14.4(13)        |
| C4   | 71(2)           | 86(3)           | 87(2)           | -19.7(19)       | 57.9(19)        | -21.8(18)       |
| C6   | 43.8(14)        | 60.9(19)        | 63.1(17)        | -12.1(14)       | 22.5(13)        | -6.2(13)        |
| C5   | 48.3(16)        | 83(3)           | 92(2)           | -20(2)          | 39.3(17)        | -7.3(16)        |
| C15  | 88(2)           | 68(2)           | 50.0(16)        | 9.8(14)         | 44.6(16)        | 25.1(17)        |
| Cl1  | 46.8(4)         | 59.5(5)         | 39.6(3)         | 8.7(3)          | 13.2(3)         | 3.4(3)          |

**Table S5.** Bond Lengths for **B1**.

| Atom | Atom | Length/Å | Atom | Atom | Length/Å |
|------|------|----------|------|------|----------|
| N2   | C11  | 1.362(3) | C7   | C6   | 1.398(3) |
| N2   | C13  | 1.370(3) | C7   | C8   | 1.423(3) |
| N2   | C12  | 1.451(3) | C18  | C17  | 1.395(3) |
| C10  | C11  | 1.370(3) | C18  | C13  | 1.407(3) |
| C10  | C18  | 1.445(3) | C8   | Cl1  | 1.722(2) |
| C10  | C9   | 1.458(3) | C13  | C14  | 1.399(3) |
| N1   | C2   | 1.377(3) | C17  | C16  | 1.379(3) |
| N1   | C9   | 1.392(3) | C3   | C4   | 1.381(4) |
| N1   | C1   | 1.446(3) | C16  | C15  | 1.392(4) |
| C9   | C8   | 1.372(3) | C14  | C15  | 1.362(4) |

|    |    |          |    |    |          |
|----|----|----------|----|----|----------|
| C2 | C3 | 1.395(3) | C4 | C5 | 1.389(5) |
| C2 | C7 | 1.403(3) | C6 | C5 | 1.372(4) |

**Table S6.** Bond Angles for **B1**.

| Atom | Atom | Atom | Angle/°    | Atom | Atom | Atom | Angle/°    |
|------|------|------|------------|------|------|------|------------|
| C11  | N2   | C13  | 108.36(18) | C17  | C18  | C13  | 119.0(2)   |
| C11  | N2   | C12  | 124.8(2)   | C17  | C18  | C10  | 134.4(2)   |
| C13  | N2   | C12  | 126.7(2)   | C13  | C18  | C10  | 106.54(19) |
| C11  | C10  | C18  | 105.66(18) | C9   | C8   | C7   | 109.5(2)   |
| C11  | C10  | C9   | 125.6(2)   | C9   | C8   | C11  | 126.21(16) |
| C18  | C10  | C9   | 128.66(19) | C7   | C8   | C11  | 124.02(18) |
| C2   | N1   | C9   | 108.60(18) | N2   | C13  | C14  | 129.7(2)   |
| C2   | N1   | C1   | 124.06(19) | N2   | C13  | C18  | 108.40(18) |
| C9   | N1   | C1   | 127.34(18) | C14  | C13  | C18  | 121.9(2)   |
| C8   | C9   | N1   | 107.55(18) | N2   | C11  | C10  | 111.0(2)   |
| C8   | C9   | C10  | 130.5(2)   | C16  | C17  | C18  | 118.8(2)   |
| N1   | C9   | C10  | 121.87(19) | C4   | C3   | C2   | 117.4(3)   |
| N1   | C2   | C3   | 129.7(2)   | C17  | C16  | C15  | 120.9(2)   |
| N1   | C2   | C7   | 109.16(19) | C15  | C14  | C13  | 117.4(2)   |
| C3   | C2   | C7   | 121.1(2)   | C3   | C4   | C5   | 121.9(2)   |
| C6   | C7   | C2   | 120.0(2)   | C5   | C6   | C7   | 118.7(3)   |
| C6   | C7   | C8   | 134.8(2)   | C6   | C5   | C4   | 120.9(3)   |
| C2   | C7   | C8   | 105.2(2)   | C14  | C15  | C16  | 122.0(2)   |

**Table S7.** Torsion Angles for **B1**.

| A   | B   | C  | D   | Angle/°   | A   | B   | C   | D   | Angle/°     |
|-----|-----|----|-----|-----------|-----|-----|-----|-----|-------------|
| C2  | N1  | C9 | C8  | -1.7(3)   | C2  | C7  | C8  | C11 | -175.36(18) |
| C1  | N1  | C9 | C8  | 178.3(2)  | C11 | N2  | C13 | C14 | 179.9(3)    |
| C2  | N1  | C9 | C10 | 176.4(2)  | C12 | N2  | C13 | C14 | 3.4(4)      |
| C1  | N1  | C9 | C10 | -3.6(4)   | C11 | N2  | C13 | C18 | 0.3(3)      |
| C11 | C10 | C9 | C8  | 132.1(3)  | C12 | N2  | C13 | C18 | -176.2(2)   |
| C18 | C10 | C9 | C8  | -45.3(4)  | C17 | C18 | C13 | N2  | 179.7(2)    |
| C11 | C10 | C9 | N1  | -45.5(3)  | C10 | C18 | C13 | N2  | -0.4(3)     |
| C18 | C10 | C9 | N1  | 137.1(2)  | C17 | C18 | C13 | C14 | 0.1(4)      |
| C9  | N1  | C2 | C3  | -178.4(3) | C10 | C18 | C13 | C14 | 180.0(2)    |
| C1  | N1  | C2 | C3  | 1.6(4)    | C13 | N2  | C11 | C10 | 0.0(3)      |
| C9  | N1  | C2 | C7  | 0.9(3)    | C12 | N2  | C11 | C10 | 176.6(2)    |
| C1  | N1  | C2 | C7  | -179.1(2) | C18 | C10 | C11 | N2  | -0.3(3)     |
| N1  | C2  | C7 | C6  | -178.0(2) | C9  | C10 | C11 | N2  | -178.1(2)   |
| C3  | C2  | C7 | C6  | 1.3(4)    | C13 | C18 | C17 | C16 | -0.8(4)     |

|               |            |              |           |
|---------------|------------|--------------|-----------|
| N1 C2 C7 C8   | 0.2(3)     | C10C18C17C16 | 179.4(3)  |
| C3 C2 C7 C8   | 179.6(2)   | N1 C2 C3 C4  | 178.1(3)  |
| C11C10C18C17  | -179.8(3)  | C7 C2 C3 C4  | -1.0(4)   |
| C9 C10C18C17  | -2.0(4)    | C18C17C16C15 | 0.9(4)    |
| C11C10C18C13  | 0.4(3)     | N2 C13C14C15 | -179.1(3) |
| C9 C10C18C13  | 178.2(2)   | C18C13C14C15 | 0.4(4)    |
| N1 C9 C8 C7   | 1.9(3)     | C2 C3 C4 C5  | -0.1(5)   |
| C10 C9 C8 C7  | -176.0(2)  | C2 C7 C6 C5  | -0.4(4)   |
| N1 C9 C8 C11  | 175.76(17) | C8 C7 C6 C5  | -178.0(3) |
| C10 C9 C8 C11 | -2.1(4)    | C7 C6 C5 C4  | -0.8(5)   |
| C6 C7 C8 C9   | 176.6(3)   | C3 C4 C5 C6  | 1.0(5)    |
| C2 C7 C8 C9   | -1.3(3)    | C13C14C15C16 | -0.2(4)   |
| C6 C7 C8 C11  | 2.5(4)     | C17C16C15C14 | -0.5(5)   |

**Table S8.** Hydrogen Atom Coordinates ( $\text{\AA}\times 10^4$ ) and Isotropic Displacement Parameters ( $\text{\AA}^2\times 10^3$ ) for B1.

| Atom | x     | y    | z    | U(eq) |
|------|-------|------|------|-------|
| H11  | 8514  | 2547 | 3546 | 50    |
| H17  | 6190  | 318  | 442  | 53    |
| H3   | 5043  | 840  | 4313 | 72    |
| H1A  | 7594  | -104 | 3842 | 74    |
| H1B  | 6700  | -415 | 4251 | 74    |
| H1C  | 7391  | 1286 | 4482 | 74    |
| H16  | 7005  | -364 | -579 | 69    |
| H12A | 10831 | 1420 | 3134 | 93    |
| H12B | 10493 | 2607 | 3788 | 93    |
| H12C | 10537 | 3350 | 2871 | 93    |
| H14  | 10003 | 920  | 1312 | 67    |
| H4   | 3232  | 1741 | 3874 | 88    |
| H6   | 3097  | 3407 | 1408 | 67    |
| H5   | 2284  | 3037 | 2457 | 85    |
| H15  | 8882  | -83  | -140 | 76    |

## 8. Reference.

1. X. Hong, Q. Tan, B. Liu and B. Xu, *Angew. Chem., Int. Ed.* 2017, **56**, 1–6.
2. Y. Li, K. Ji, H. Wang, X. Chen, Shaikat Aliand and Y. Liang, *J. Org. Chem.* 2011, **76**, 744–747.
3. J. Yang, S. Liu, J. Zheng and J. Zhou, *Eur. J. Org. Chem.* 2012, **31**, 6248–6259.



## 9. Analytic data of the obtained compounds.

### (1) 1,1'-dimethyl-1*H*,1'*H*-2,3'-biindole (B-I-1)

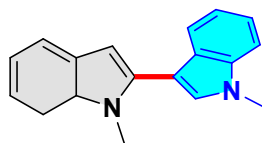

Known compounds, yellow solid, <sup>1</sup>H NMR (500 MHz, Chloroform-d) δ 7.74 (d, *J* = 8.0 Hz, 1H), 7.68 (d, *J* = 7.8 Hz, 1H), 7.44 (d, *J* = 8.2 Hz, 1H), 7.41 (d, *J* = 8.2 Hz, 1H), 7.35 (t, *J* = 7.2 Hz, 1H), 7.24 (m, 3H), 7.18 (t, *J* = 7.4 Hz, 1H), 6.66 (s, 1H), 3.92 (s, 3H), 3.79 (s, 3H). <sup>13</sup>C NMR (125 MHz, Chloroform-d) δ 137.98, 136.97, 135.11, 128.44, 128.42, 127.72, 122.35, 121.00, 120.38, 120.23, 120.04, 119.57, 109.55, 109.37, 107.36, 101.43, 33.04, 31.01.

### (2) 3-chloro-1-methyl-1*H*-indole (A32)

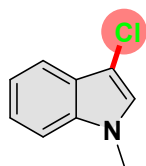

Known compounds, brownish solid, <sup>1</sup>H NMR (500 MHz, Chloroform-d) δ 7.68 (d, *J* = 7.9 Hz, 1H), 7.34–7.29 (m, 2H), 7.24 (d, *J* = 8.0 Hz, 1H), 7.01 (s, 1H), 3.73 (s, 3H). <sup>13</sup>C NMR (125 MHz, Chloroform-d) δ 135.88, 125.77, 125.31, 122.66, 119.96, 118.39, 109.58, 104.38, 32.95.

### (3) 3-chloro-1,1'-dimethyl-1*H*,1'*H*-2,3'-biindole (B1)

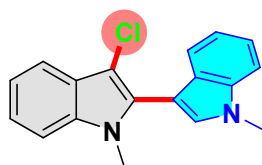

Yellow solid, (49.0 mg, 67% yield), m.p.: 110-112 °C; <sup>1</sup>H NMR (500 MHz, Chloroform-d) δ 7.63 (d, *J* = 7.8 Hz, 1H), 7.48 (d, *J* = 8.0 Hz, 1H), 7.39 (d, *J* = 8.3 Hz, 1H), 7.34 (d, *J* = 8.2 Hz, 1H), 7.30–7.27 (m, 1H), 7.26 (s, 1H), 7.24 (t, *J* = 15 Hz, 1H), 7.19 (t, *J* = 15 Hz, 1H), 7.15 (t, *J* = 15 Hz, 1H), 3.87 (s, 3H), 3.63 (s, 3H). <sup>13</sup>C NMR (125 MHz, Chloroform-d) δ 136.93, 136.33, 131.16, 130.24, 127.51, 125.95, 122.30,

122.22, 120.51, 120.33, 120.10, 117.96, 109.76, 109.58, 103.73, 103.72, 33.18, 31.52.

HRMS (ESI): Calcd. for  $C_{18}H_{15}ClN_2$   $[M+H]^+$ : 295.0996; found: 295.0996.

**(4) 3-chloro-1,1'-diethyl-1*H*,1'*H*-2,3'-biindole (B2)**

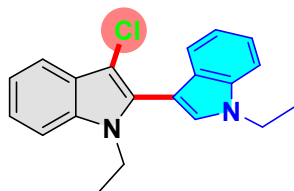

Brownish solid, (45.0 mg, 56% yield); m.p.: 112-115 °C;  $^1H$  NMR (500 MHz, Chloroform-*d*)  $\delta$  7.78 (d,  $J$  = 8.0 Hz, 1H), 7.60 (d,  $J$  = 8.0 Hz, 1H), 7.53 (d,  $J$  = 8.3 Hz, 1H), 7.49 (d,  $J$  = 8.1 Hz, 1H), 7.41 (s, 1H), 7.40–7.34 (m, 2H), 7.31 (t,  $J$  = 7.4 Hz, 1H), 7.26 (t,  $J$  = 8.0 Hz, 1H), 4.33 (q,  $J$  = 7.3 Hz, 2H), 4.25 (q,  $J$  = 7.1 Hz, 2H), 1.63 (t,  $J$  = 7.3 Hz, 3H), 1.26 (t,  $J$  = 7.2 Hz, 3H).  $^{13}C$  NMR (125 MHz, Chloroform-*d*)  $\delta$  136.06, 135.21, 130.44, 128.19, 127.79, 126.37, 122.22, 122.21, 120.55, 120.25, 120.05, 118.16, 109.98, 109.87, 103.97, 41.38, 39.49, 15.53, 15.52. HRMS (ESI): Calcd. for  $C_{20}H_{19}ClN_2$   $[M+H]^+$ : 323.1309; found: 323.1309.

**(5) 3-chloro-1,1'-diphenyl-1*H*,1'*H*-2,3'-biindole (B3)**

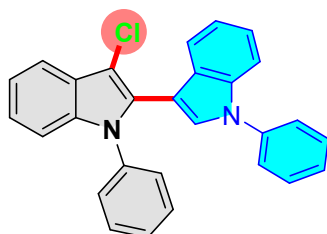

Yellow solid, (41.0 mg, 39% yield); m.p.: 103-105 °C;  $^1H$  NMR (500 MHz, Chloroform-*d*)  $\delta$  7.78 (d,  $J$  = 7.2 Hz, 1H), 7.61 (d,  $J$  = 8.0 Hz, 1H), 7.54 (d,  $J$  = 8.3 Hz, 1H), 7.51–7.48 (m, 2H), 7.39–7.34 (m, 6H), 7.32 (m, 2H), 7.30–7.28 (m, 2H), 7.26 (s, 1H), 7.25–7.22 (m, 1H), 7.16 (d,  $J$  = 7.2 Hz, 1H), 7.14 (s, 1H).  $^{13}C$  NMR (125 MHz, Chloroform-*d*)  $\delta$  139.13, 138.13, 136.71, 135.86, 129.66, 129.19, 129.10, 127.79, 127.68, 127.36, 126.90, 126.37, 124.49, 123.11, 122.84, 121.34, 121.05, 120.83, 118.09, 110.67, 110.60, 106.61. HRMS (ESI): Calcd. for  $C_{28}H_{19}ClN_2$   $[M+H]^+$ : 419.1309; found: 419.1309.

**(6) 1,1'-dibenzyl-3-chloro-1*H*,1'*H*-2,3'-biindole (B4)**

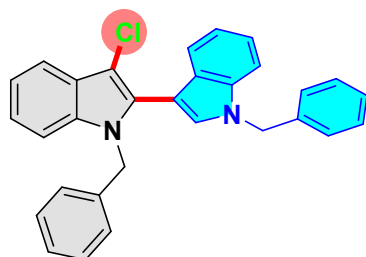

Brownish solid, (70.0 mg, 63% yield), m.p.: 135-137 °C; <sup>1</sup>H NMR (500 MHz, Chloroform-d) δ 7.75 (d, *J* = 9.0 Hz, 1H), 7.61 (d, *J* = 7.9 Hz, 1H), 7.38 (d, *J* = 8.2 Hz, 1H), 7.33–7.28 (m, 5H), 7.26–7.24 (m, 2H), 7.22–7.19 (m, 4H), 7.14 (s, 1H), 7.13–7.11 (m, 2H), 6.93–6.91 (m, 2H), 5.34 (s, 4H). <sup>13</sup>C NMR (125 MHz, Chloroform-d) δ 138.18, 136.83, 136.43, 135.98, 129.50, 128.88, 128.62, 127.84, 127.71, 127.18, 126.91, 126.04, 122.56, 122.52, 120.66, 120.53, 120.35, 118.10, 110.40, 110.19, 104.28, 50.34, 48.06. HRMS (ESI): Calcd. for C<sub>30</sub>H<sub>23</sub>ClN<sub>2</sub> [M+H]<sup>+</sup>: 447.1622; found: 447.1622.

**(7) 1,1'-diallyl-3-chloro-1*H*,1'*H*-2,3'-biindole (B5)**

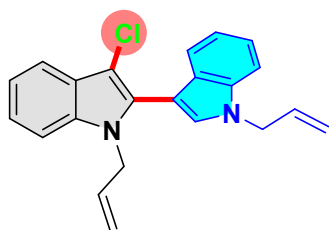

Red solid, (67.0 mg, 78% yield), m.p.: 116-119 °C; <sup>1</sup>H NMR (500 MHz, Chloroform-d) δ 7.71 (d, *J* = 7.8 Hz, 1H), 7.57 (d, *J* = 8.0 Hz, 1H), 7.42 (d, *J* = 8.3 Hz, 1H), 7.36 (d, *J* = 7.9 Hz, 1H), 7.32 (s, 1H), 7.32–7.26 (m, 2H), 7.24 (t, *J* = 7.0 Hz, 1H), 7.20 (t, *J* = 7.5 Hz, 1H), 6.11–6.03 (m, 1H), 5.91–5.83 (m, 1H), 5.28 (d, *J* = 10.2 Hz, 1H), 5.17 (d, *J* = 17.1 Hz, 1H), 5.12 (d, *J* = 10.4 Hz, 1H), 4.92 (d, *J* = 17.2 Hz, 1H), 4.82 (d, *J* = 5.3 Hz, 2H), 4.72–4.68 (m, 2H). <sup>13</sup>C NMR (125 MHz, Chloroform-d) δ 136.32, 135.82, 133.94, 133.08, 130.64, 129.02, 127.71, 126.23, 122.39, 122.37, 120.73, 120.39, 120.26, 118.07, 117.83, 116.46, 110.43, 110.10, 104.10, 49.08, 46.98. HRMS (ESI): Calcd. for C<sub>22</sub>H<sub>19</sub>ClN<sub>2</sub> [M+H]<sup>+</sup>: 347.1309; found: 347.1309.

**(8) 1,1'-diallyl-3-chloro-5,5'-dimethyl-1*H*,1'*H*-2,3'-biindole (B6)**

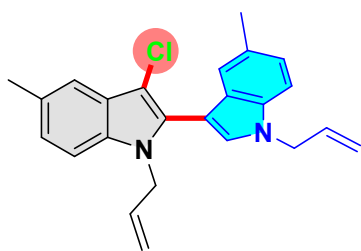

Yellow solid, (31.0 mg, 33% yield); m.p.: 105-107 °C; <sup>1</sup>H NMR (500 MHz, Chloroform-d) δ 7.50 (s, 1H), 7.35 (s, 1H), 7.32 (d, *J* = 8.4 Hz, 1H), 7.29 (s, 1H), 7.27 (d, *J* = 8.9 Hz, 1H), 7.15–7.11 (m, 2H), 6.12–6.04 (m, 1H), 5.91–5.84 (m, 1H), 5.28 (d, *J* = 10.3 Hz, 1H), 5.18 (d, *J* = 17.1 Hz, 1H), 5.13 (d, *J* = 10.4 Hz, 1H), 4.93 (d, *J* = 17.2 Hz, 1H), 4.82 (d, *J* = 5.3 Hz, 2H), 4.71–4.67 (m, 2H), 2.55 (s, 3H), 2.47 (s, 3H). <sup>13</sup>C NMR (125 MHz, Chloroform-d) δ 134.68, 134.17, 134.06, 133.19, 130.80, 129.72, 129.63, 129.02, 127.97, 126.37, 123.95, 123.87, 120.27, 117.62, 117.60, 116.28, 110.12, 109.72, 103.63, 49.08, 46.99, 21.50, 21.49. HRMS (ESI): Calcd. for C<sub>24</sub>H<sub>23</sub>ClN<sub>2</sub> [M+H]<sup>+</sup>: 375.1622; found: 375.1622.

**(9) 1,1'-diallyl-3-chloro-7,7'-dimethyl-1*H*,1'*H*-2,3'-biindole (B7)**

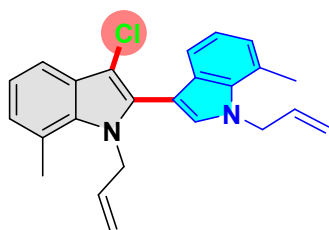

Yellow solid, (26.0 mg, 28% yield), m.p.: 113-117 °C; <sup>1</sup>H NMR (500 MHz, Chloroform-d) δ 7.57 (d, *J* = 7.9 Hz, 1H), 7.38 (d, *J* = 7.9 Hz, 1H), 7.26 (s, 1H), 7.14 (t, *J* = 7.5 Hz, 1H), 7.08 (d, *J* = 7.8 Hz, 1H), 7.03–7.02 (m, 2H), 6.18–6.10 (m, 1H), 5.88–5.81 (m, 1H), 5.24 (d, *J* = 10.4 Hz, 1H), 5.04 (d, *J* = 10.5 Hz, 4H), 4.88 (d, *J* = 17.1 Hz, 1H), 4.72 (d, *J* = 17.0 Hz, 1H), 4.61 (d, *J* = 17.2 Hz, 1H), 2.77 (s, 3H), 2.74 (s, 3H). <sup>13</sup>C NMR (125 MHz, Chloroform-d) δ 136.67, 136.15, 134.08, 133.22, 132.25, 132.20, 128.30, 125.61, 124.15, 122.08, 121.94, 120.40, 117.69, 117.61, 116.29, 110.27, 109.93, 104.12, 48.90, 46.78, 22.00, 21.92. HRMS (ESI): Calcd. for C<sub>24</sub>H<sub>23</sub>ClN<sub>2</sub> [M+H]<sup>+</sup>: 375.1622; found: 375.1622.



**(10) 1,1'-diallyl-3-chloro-5,5'-dimethoxy-1*H*,1'*H*-2,3'-biindole (B8)**

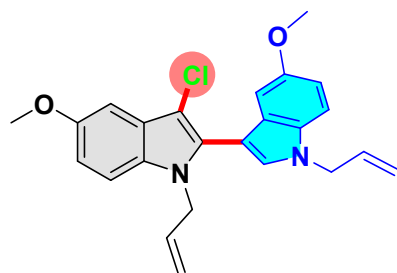

Brownish solid, (21.0 mg, 21% yield), m.p.: 119-121 °C; <sup>1</sup>H NMR (500 MHz, Chloroform-*d*) δ 7.32 (d, *J* = 8.9 Hz, 1H), 7.30 (s, 1H), 7.28 (d, *J* = 8.7 Hz, 1H), 7.16 (d, *J* = 2.4 Hz, 1H), 7.01 (d, *J* = 2.4 Hz, 1H), 6.98–6.94 (m, 2H), 6.12–6.05 (m, 1H), 5.95–5.88 (m, 1H), 5.29 (d, *J* = 10.1 Hz, 1H), 5.21–5.15 (m, 2H), 4.97 (d, *J* = 17.2 Hz, 1H), 4.81 (d, *J* = 5.4 Hz, 2H), 4.69 (s, 2H), 3.95 (s, 3H), 3.83 (s, 3H). <sup>13</sup>C NMR (125 MHz, Chloroform-*d*) δ 154.77, 154.76, 134.12, 133.16, 131.42, 130.94, 129.23, 128.10, 126.50, 117.75, 116.38, 113.02, 112.80, 111.43, 110.88, 103.75, 101.88, 99.31, 55.92, 55.84, 49.27, 47.08. HRMS (ESI): Calcd. for C<sub>24</sub>H<sub>23</sub>ClN<sub>2</sub>O<sub>2</sub> [M+H]<sup>+</sup>: 407.1520; found: 407.1520.

**(11) 3-chloro-6,6'-difluoro-1,1'-dimethyl-1*H*,1'*H*-2,3'-biindole (B9)**

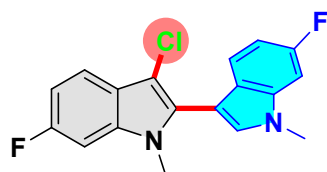

White solid, (59.0 mg, 71% yield); m.p.: 135-139 °C; <sup>1</sup>H NMR (500 MHz, Chloroform-*d*) δ 7.58 (dd, *J* = 8.6, 5.3 Hz, 1H), 7.42 (dd, *J* = 8.7, 5.2 Hz, 1H), 7.26 (s, 1H), 7.10 (dd, *J* = 9.6, 2.2 Hz, 1H), 7.06 (dd, *J* = 9.7, 2.2 Hz, 1H), 7.02–6.95 (m, 2H), 3.86 (s, 3H), 3.61 (s, 3H). <sup>13</sup>C NMR (125 MHz, Chloroform-*d*) δ 161.17 (d, *J* = 8.75 Hz), 159.26 (d, *J* = 8.75 Hz), 137.00 (d, *J* = 11.25 Hz), 136.36 (d, *J* = 12.5 Hz), 130.97 (d, *J* = 3.75 Hz), 130.42 (d, *J* = 2.5 Hz), 123.87, 122.46, 121.31 (d, *J* = 10 Hz), 118.94 (d, *J* = 10 Hz), 109.19 (d, *J* = 23.75 Hz), 108.89 (d, *J* = 25 Hz), 104.03, 103.87, 96.31 (d, *J* = 6.25 Hz), 96.10 (d, *J* = 6.25 Hz), 33.29, 31.59. <sup>19</sup>F NMR (471 MHz, Chloroform-*d*) δ -119.64, -119.83. HRMS (ESI): Calcd. for C<sub>18</sub>H<sub>13</sub>ClF<sub>2</sub>N<sub>2</sub> [M+H]<sup>+</sup>: 331.0808; found: 331.0808.

**(12) 3,4,4'-trichloro-1,1'-dimethyl-1*H*,1'*H*-2,3'-biindole (B10)**

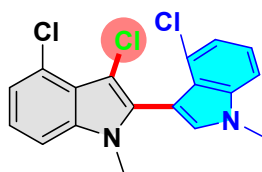

White solid, (53.0 mg, 59% yield), m.p.: 127-133 °C; <sup>1</sup>H NMR (500 MHz, Chloroform-d) δ 7.35 (d, *J* = 8.2 Hz, 1H), 7.27 (t, *J* = 5.0 Hz, 1H), 7.26 (d, *J* = 2.7 Hz, 1H), 7.23 (t, *J* = 7.9 Hz, 1H), 7.17–7.15 (m, 3H), 3.92 (s, 3H), 3.56 (s, 3H). <sup>13</sup>C NMR (125 MHz, Chloroform-d) δ 138.17, 136.99, 132.12, 131.86, 125.96, 125.36, 125.27, 122.97, 122.39, 121.53, 121.17, 108.59, 108.41, 104.53, 102.45, 33.49, 31.46. HRMS (ESI): Calcd. for C<sub>18</sub>H<sub>13</sub>Cl<sub>3</sub>N<sub>2</sub> [M+H]<sup>+</sup>: 363.0217; found: 363.0217.

**(13) 3,5,5'-trichloro-1,1'-dimethyl-1*H*,1'*H*-2,3'-biindole (B11)**

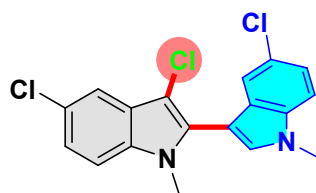

Brownish solid, (67.0 mg, 74% yield), m.p.: 139-143 °C; <sup>1</sup>H NMR (500 MHz, Chloroform-d) δ 7.63 (s, 1H), 7.46 (s, 1H), 7.34 (d, *J* = 8.7 Hz, 1H), 7.32 (s, 1H), 7.28 (s, 1H), 7.26 (d, *J* = 3.0 Hz, 1H), 7.24 (d, *J* = 6.7 Hz, 1H), 3.91 (s, 3H), 3.65 (s, 3H). <sup>13</sup>C NMR (125 MHz, Chloroform-d) δ 135.36, 134.77, 131.74, 131.49, 128.32, 126.80, 126.52, 126.10, 122.86, 122.75, 119.71, 117.49, 110.94, 110.75, 103.49, 103.06, 33.43, 31.70. HRMS (ESI): Calcd. for C<sub>18</sub>H<sub>13</sub>Cl<sub>3</sub>N<sub>2</sub> [M+H]<sup>+</sup>: 363.0217; found: 363.0217.

**(14) 3,6,6'-trichloro-1,1'-dimethyl-1*H*,1'*H*-2,3'-biindole (B12)**

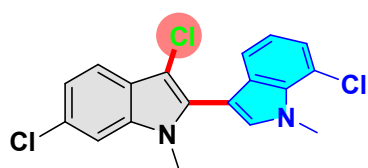

Brownish solid, (66.0 mg, 73% yield), m.p.: 187-189 °C; <sup>1</sup>H NMR (500 MHz, Chloroform-d) δ 7.55 (d, *J* = 8.4 Hz, 1H), 7.42 (s, 1H), 7.40 (d, *J* = 8.5 Hz, 1H), 7.36

(s, 1H), 7.28 (s, 1H), 7.20–7.15 (m, 2H), 3.88 (s, 3H), 3.61 (s, 3H). <sup>13</sup>C NMR (125 MHz, Chloroform-d) δ 137.34, 136.69, 131.17, 130.80, 128.60, 128.43, 125.87, 124.47, 121.31, 121.19, 120.91, 118.96, 109.92, 109.69, 104.19, 103.69, 33.31, 31.56. HRMS (ESI): Calcd. for C<sub>18</sub>H<sub>13</sub>Cl<sub>3</sub>N<sub>2</sub> [M+H]<sup>+</sup>: 363.0217; found: 363.0217.

**(15) 1,1'-dibenzyl-3,6,6'-trichloro-1*H*,1'*H*-2,3'-biindole (B13)**

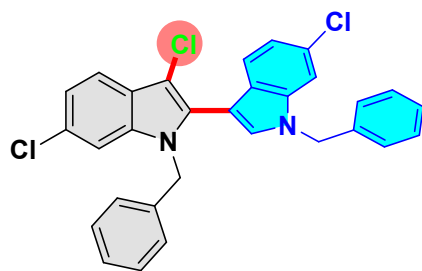

Brownish solid, (102.0 mg, 79% yield), m.p.: 141-144 °C; <sup>1</sup>H NMR (500 MHz, Chloroform-d) δ 7.65 (d, *J* = 8.5 Hz, 1H), 7.48 (d, *J* = 8.5 Hz, 1H), 7.39 (s, 1H), 7.36 – 7.35 (m, 3H), 7.31 (s, 1H), 7.26–7.23 (m, 4H), 7.19 (d, *J* = 10.3 Hz, 1H), 7.12–7.10 (m, 2H), 7.09 (s, 1H), 6.90–6.88 (m, 2H), 5.29 (d, *J* = 5.3 Hz, 4H). <sup>13</sup>C NMR (125 MHz, Chloroform-d) δ 137.43, 136.81, 136.39, 136.14, 130.86, 129.97, 129.02, 128.80, 128.79, 128.11, 127.48, 126.88, 126.07, 125.84, 124.75, 121.50, 121.43, 121.26, 119.15, 110.32, 110.24, 104.21, 50.44, 48.08. HRMS (ESI): Calcd. for C<sub>30</sub>H<sub>21</sub>Cl<sub>3</sub>N<sub>2</sub> [M+H]<sup>+</sup>: 515.0843; found: 515.0843.

**(16) 5,5'-dibromo-3-chloro-1,1'-dimethyl-1*H*,1'*H*-2,3'-biindole (B14)**

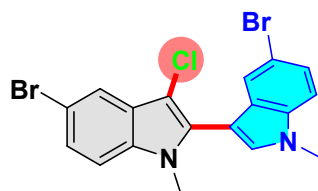

Brownish solid, (76.0 mg, 68% yield), m.p.: 132-135 °C; <sup>1</sup>H NMR (500 MHz, Chloroform-d) δ 7.78 (s, 1H), 7.60 (s, 1H), 7.39 (d, *J* = 10.5 Hz, 1H), 7.38–7.35 (m, 1H), 7.29 (t, *J* = 4.3 Hz, 2H), 7.23 (d, *J* = 8.6 Hz, 1H), 3.90 (s, 3H), 3.64 (s, 3H). <sup>13</sup>C NMR (125 MHz, Chloroform-d) δ 135.63, 135.05, 131.59, 131.38, 128.93, 127.40, 125.41, 125.31, 122.78, 120.54, 114.03, 113.55, 111.42, 111.22, 103.36, 102.88, 33.42, 31.69. HRMS (ESI): Calcd. for C<sub>18</sub>H<sub>13</sub>Br<sub>2</sub>ClN<sub>2</sub> [M+H]<sup>+</sup>: 450.9206; found: 450.9206.

**(17) 1,1'-diallyl-5,5'-dibromo-3-chloro-1*H*,1'*H*-2,3'-biindole (B15)**

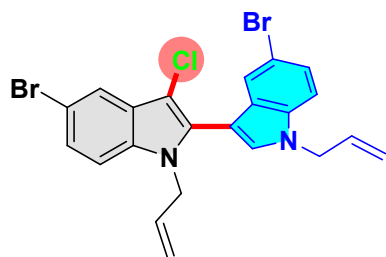

Brownish solid, (102.0 mg, 81% yield); m.p.: 116-117 °C; <sup>1</sup>H NMR (500 MHz, Chloroform-d) δ 7.84 (s, 1H), 7.68 (s, 1H), 7.39 (d, *J* = 10.6 Hz, 1H), 7.36 (d, *J* = 10.6 Hz, 1H), 7.33 (s, 1H), 7.30 (d, *J* = 8.7 Hz, 1H), 7.23 (d, *J* = 8.7 Hz, 1H), 6.11 – 6.03 (m, 1H), 5.89–5.82 (m, 1H), 5.33–5.30 (m, 1H), 5.19–5.14 (m, 2H), 4.91–4.86 (m, 1H), 4.83–4.82 (m, 2H), 4.67 (s, 2H). <sup>13</sup>C NMR (125 MHz, Chloroform-d) δ 134.98, 134.48, 133.31, 132.52, 131.03, 130.12, 129.09, 127.65, 125.49, 125.48, 123.03, 120.71, 118.19, 116.77, 114.03, 113.70, 111.96, 111.68, 104.23, 103.24, 49.28, 47.05. HRMS (ESI): Calcd. for C<sub>22</sub>H<sub>17</sub>Br<sub>2</sub>ClN<sub>2</sub> [M+H]<sup>+</sup>: 502.9519; found: 502.9519.

**(18) 6,6'-dibromo-3-chloro-1,1'-dimethyl-1*H*,1'*H*-2,3'-biindole (B16)**

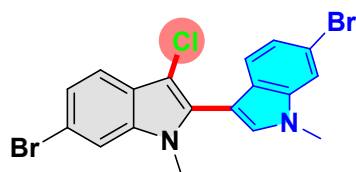

White solid, (77.0 mg, 68% yield), m.p.: 139-141 °C; <sup>1</sup>H NMR (500 MHz, Chloroform-d) δ 7.59 (s, 1H), 7.53 (s, 1H), 7.50 (d, *J* = 8.4 Hz, 1H), 7.34 (d, *J* = 8.5 Hz, 1H), 7.32–7.29 (m, 2H), 7.26 (s, 1H), 3.88 (s, 3H), 3.61 (s, 3H). <sup>13</sup>C NMR (125 MHz, Chloroform-d) δ 137.73, 137.08, 131.05, 130.73, 126.18, 124.77, 123.77, 123.48, 121.64, 119.31, 116.17, 116.01, 112.95, 112.68, 104.28, 103.68, 33.33, 31.57. HRMS (ESI): Calcd. for C<sub>18</sub>H<sub>13</sub>Br<sub>2</sub>ClN<sub>2</sub> [M+H]<sup>+</sup>: 450.9206; found: 450.9206.

**(19) 3-chloro-1,1'-dimethyl-1*H*,1'*H*-[2,3'-biindole]-5,5'-dicarbonitrile (B17)**

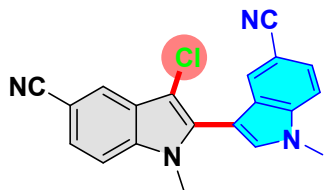

Yellow solid, (61.0 mg, 71% yield), m.p.: 239-243 °C; <sup>1</sup>H NMR (500 MHz, Chloroform-d) δ 7.99 (s, 1H), 7.83 (s, 1H), 7.55 (d, *J* = 10.2 Hz, 1H), 7.53–7.50 (m, 2H), 7.46 (s, 1H), 7.44 (d, *J* = 8.6 Hz, 1H), 3.98 (s, 3H), 3.70 (s, 3H). <sup>13</sup>C NMR (125 MHz, Chloroform-d) δ 138.44, 137.83, 132.58, 131.85, 126.95, 125.74, 125.67, 125.63, 125.57, 123.77, 120.29, 120.15, 111.01, 110.67, 105.53, 104.10, 103.92, 103.63, 33.60, 31.82. HRMS (ESI): Calcd. for C<sub>20</sub>H<sub>13</sub>ClN<sub>4</sub> [M+H]<sup>+</sup>: 345.0901; found: 345.0901.

**(20) dimethyl 3-chloro-1,1'-dimethyl-1*H*,1'*H*-[2,3'-biindole]-7,7'-dicarboxylate (B18)**

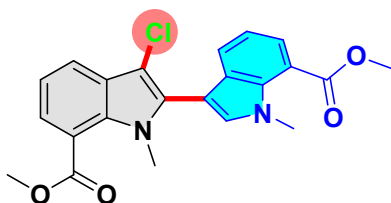

Yellow solid, (60.0 mg, 59% yield), m.p.: 221-224 °C; <sup>1</sup>H NMR (500 MHz, ) δ 7.34 (d, *J* = 3.9 Hz, 1H), 7.32 (d, *J* = 3.8 Hz, 1H), 7.21 (d, *J* = 2.3 Hz, 2H), 7.18 (s, 1H), 7.04 (d, *J* = 2.4 Hz, 1H), 6.97 (d, *J* = 11.2 Hz, 1H), 3.95 (s, 3H), 3.89 (s, 3H), 3.87 (s, 3H), 3.77 (s, 3H). <sup>13</sup>C NMR (125 MHz, Chloroform-d) δ 164.13, 154.82, 154.26, 136.39, 133.34, 132.22, 128.87, 128.67, 128.04, 112.89, 111.03, 110.41, 110.07, 106.89, 102.05, 101.65, 56.04, 55.96, 33.20, 31.09. HRMS (ESI): Calcd. for C<sub>22</sub>H<sub>19</sub>ClN<sub>2</sub>O<sub>4</sub> [M+H]<sup>+</sup>: 411.1106; found: 411.1106.

**(21) 3-chloro-1,1'-bis(naphthalen-1-ylmethyl)-1*H*,1'*H*-2,3'-biindole (B19)**

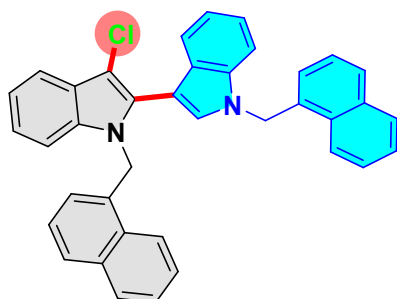

Brownish solid, (85.0 mg, 62% yield), m.p.: 157-159 °C; <sup>1</sup>H NMR (500 MHz, Chloroform-d) δ 7.92 (d, *J* = 8.1 Hz, 1H), 7.81–7.72 (m, 5H), 7.69 (d, *J* = 8.3 Hz, 1H), 7.66 (d, *J* = 8.3 Hz, 1H), 7.56 (t, *J* = 7.4 Hz, 1H), 7.50 (t, *J* = 7.2 Hz, 1H), 7.42 (d, *J* = 8.0 Hz, 1H), 7.39 (d, *J* = 7.6 Hz, 1H), 7.34–7.29 (m, 2H), 7.26 (t, *J* = 7.4 Hz, 2H), 7.19–7.13 (m, 3H), 7.06–7.02 (m, 1H), 6.89 (s, 1H), 6.72 (d, *J* = 7.0 Hz, 1H), 6.62 (d, *J* = 7.1 Hz, 1H), 5.71 (s, 2H), 5.62 (s, 2H). <sup>13</sup>C NMR (125 MHz, Chloroform-d) δ 136.57, 136.11, 133.53, 133.45, 133.10, 131.24, 128.94, 128.82, 128.71, 128.55, 127.64, 127.60, 126.58, 126.30, 126.25, 125.91, 125.82, 125.54, 125.46, 125.25, 122.87, 122.60, 122.58, 122.28, 122.15, 121.04, 120.59, 120.42, 118.09, 110.37, 110.01, 47.93, 45.73. HRMS (ESI): Calcd. for C<sub>38</sub>H<sub>27</sub>ClN<sub>2</sub> [M+H]<sup>+</sup>: 475.1935; found: 475.1935.

**(22) 3-chloro-1,1'-bis(2-methylbenzyl)-1*H*,1'*H*-2,3'-biindole (B20)**

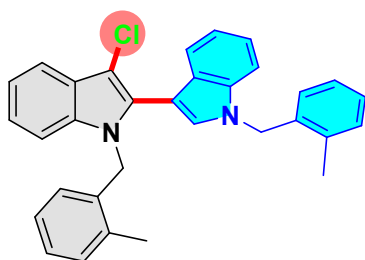

Brownish solid, (55.0 mg, 46% yield), m.p.: 138-139 °C; <sup>1</sup>H NMR (500 MHz, Chloroform-d) δ 7.78 (d, *J* = 7.5 Hz, 1H), 7.66 (d, *J* = 7.9 Hz, 1H), 7.40 (d, *J* = 8.2 Hz, 1H), 7.32–7.29 (m, 2H), 7.28–7.22 (m, 3H), 7.21–7.18 (m, 2H), 7.14–7.09 (m, 3H), 6.99 (d, *J* = 16.4 Hz, 1H), 6.89 (s, 1H), 6.80 (d, *J* = 7.6 Hz, 1H), 6.52 (d, *J* = 7.7 Hz, 1H), 5.26 (d, *J* = 3.1 Hz, 4H), 2.23 (s, 3H), 2.17 (s, 3H). <sup>13</sup>C NMR (125 MHz, Chloroform-d) δ 136.51, 136.04, 135.94, 134.27, 134.10, 130.60, 130.13, 128.70,

128.09, 127.88, 127.55, 126.97, 126.46, 126.39, 125.21, 122.56, 122.47, 120.92, 120.48, 120.37, 118.08, 110.30, 110.02, 104.16, 48.35, 45.99, 19.06, 18.96. HRMS (ESI): Calcd. for C<sub>32</sub>H<sub>27</sub>ClN<sub>2</sub> [M+H]<sup>+</sup>: 475.1935; found: 475.1935.

**(23) 3-chloro-1,1'-bis(2-chlorobenzyl)-1*H*,1'*H*-2,3'-biindole (B21)**

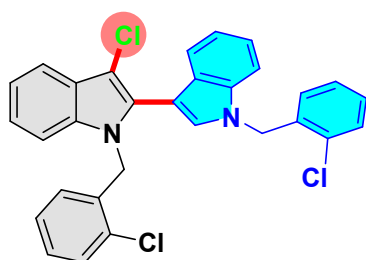

Red solid, (93.0 mg, 72% yield), m.p.: 141-143 °C; <sup>1</sup>H NMR (500 MHz, Chloroform-d) δ 7.79 (d, *J* = 7.4 Hz, 1H), 7.65 (d, *J* = 8.0 Hz, 1H), 7.42 (d, *J* = 8.0 Hz, 1H), 7.38–7.35 (m, 2H), 7.31 – 7.27 (m, 3H), 7.25–7.22 (m, 3H), 7.18–7.12 (m, 2H), 7.06 (d, *J* = 8.9 Hz, 2H), 6.72 (d, *J* = 7.7 Hz, 1H), 6.57 (d, *J* = 7.7 Hz, 1H), 5.42 (s, 4H). <sup>13</sup>C NMR (125 MHz, Chloroform-d) δ 136.41, 135.92, 135.57, 134.25, 132.77, 131.65, 129.67, 129.37, 129.16, 128.98, 128.42, 127.58, 127.36, 127.23, 127.05, 126.28, 122.86, 122.78, 120.86, 120.71, 120.65, 118.22, 110.22, 110.11, 104.30, 47.95, 45.77. HRMS (ESI): Calcd. for C<sub>30</sub>H<sub>21</sub>Cl<sub>3</sub>N<sub>2</sub> [M+H]<sup>+</sup>: 515.0843; found: 515.0843.

**(24) 3-chloro-1,1'-bis(3-methylbenzyl)-1*H*,1'*H*-2,3'-biindole (B22)**

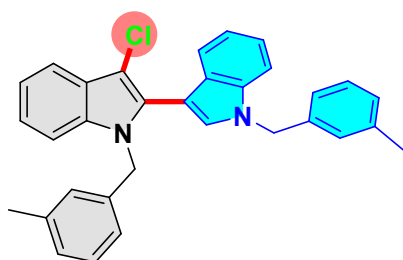

White solid, (62.0 mg, 52% yield), m.p.: 150-152 °C; <sup>1</sup>H NMR (500 MHz, Chloroform-d) δ 7.78 (d, *J* = 9.0 Hz, 1H), 7.64 (d, *J* = 7.9 Hz, 1H), 7.43 (d, *J* = 8.2 Hz, 1H), 7.34–7.27 (m, 4H), 7.24 (t, *J* = 7.5 Hz, 2H), 7.19 (s, 1H), 7.15–7.11 (m, 2H), 7.04 (d, *J* = 7.5 Hz, 1H), 7.02 (s, 1H), 6.95 (d, *J* = 7.6 Hz, 1H), 6.82 (s, 1H), 6.76 (d, *J* = 7.6 Hz, 1H), 5.34 (d, *J* = 4.5 Hz, 4H), 2.35 (s, 3H), 2.26 (s, 3H). <sup>13</sup>C NMR (125 MHz, Chloroform-

d)  $\delta$  138.60, 138.29, 138.12, 136.77, 136.49, 135.98, 129.46, 128.78, 128.62, 128.53, 127.97, 127.75, 127.68, 126.74, 124.05, 123.15, 122.51, 122.48, 120.72, 120.46, 120.31, 118.04, 110.48, 110.20, 104.25, 50.32, 48.06, 21.42, 21.41. HRMS (ESI): Calcd. for  $C_{32}H_{27}ClN_2$   $[M+H]^+$ : 475.1935; found: 475.1935.

**(25) 3-chloro-1,1'-bis(3-chlorobenzyl)-1*H*,1'*H*-2,3'-biindole (B23)**

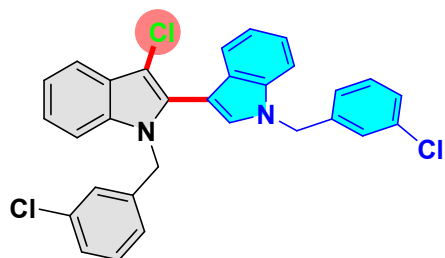

Brownish solid, (89.0 mg, 69% yield), m.p.: 167-169 °C;  $^1H$  NMR (500 MHz, Chloroform-*d*)  $\delta$  7.74 (d,  $J$  = 9.7 Hz, 1H), 7.57 (d,  $J$  = 7.9 Hz, 1H), 7.35 (d,  $J$  = 8.2 Hz, 1H), 7.30–7.26 (m, 4H), 7.26 (s, 1H), 7.24–7.18 (m, 2H), 7.16 (d,  $J$  = 9.3 Hz, 2H), 7.13–7.09 (m, 2H), 6.95 (d,  $J$  = 7.5 Hz, 1H), 6.93 (s, 1H), 6.74 (d,  $J$  = 7.6 Hz, 1H), 5.30 (d,  $J$  = 7.3 Hz, 4H).  $^{13}C$  NMR (125 MHz, Chloroform-*d*)  $\delta$  140.17, 138.81, 136.37, 135.89, 134.86, 134.60, 130.26, 129.98, 129.25, 128.19, 127.53, 127.05, 126.20, 124.98, 124.18, 122.86, 120.84, 120.65, 120.62, 118.30, 110.20, 110.10, 104.51, 49.77, 47.56. HRMS (ESI): Calcd. for  $C_{30}H_{21}Cl_3N_2$   $[M+H]^+$ : 515.0843; found: 515.0843.

**(26) 1,1'-bis(3-bromobenzyl)-3-chloro-1*H*,1'*H*-2,3'-biindole (B24)**

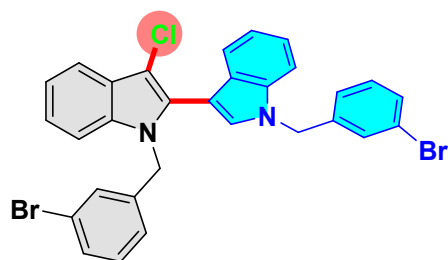

Brownish solid, (92.0 mg, 61% yield), m.p.: 150-152 °C;  $^1H$  NMR (500 MHz, Chloroform-*d*)  $\delta$  7.72 (d,  $J$  = 9.8 Hz, 1H), 7.55 (d,  $J$  = 7.9 Hz, 1H), 7.42 (d,  $J$  = 7.9 Hz, 1H), 7.33 (d,  $J$  = 8.3 Hz, 1H), 7.31 (s, 1H), 7.29–7.24 (m, 5H), 7.21–7.15 (m, 2H), 7.09 (s, 2H), 7.03 (t,  $J$  = 7.8 Hz, 1H), 6.97 (d,  $J$  = 7.7 Hz, 1H), 6.76 (d,  $J$  = 7.7 Hz, 1H), 5.28



(d,  $J = 7.3$  Hz, 4H).  $^{13}\text{C}$  NMR (125 MHz, Chloroform- $d$ )  $\delta$  140.41, 139.06, 136.36, 135.88, 131.13, 130.56, 130.46, 130.28, 129.97, 129.23, 129.14, 127.67, 126.32, 125.45, 124.65, 123.02, 122.88, 122.78, 120.85, 120.64, 120.62, 118.30, 110.19, 110.09, 104.52, 49.70, 47.50. HRMS (ESI): Calcd. for  $\text{C}_{30}\text{H}_{21}\text{Br}_2\text{ClN}_2$   $[\text{M}+\text{H}]^+$ : 602.9832; found: 602.9832.

**(27) 3-chloro-1,1'-bis(4-methylbenzyl)-1*H*,1'*H*-2,3'-biindole (B25)**

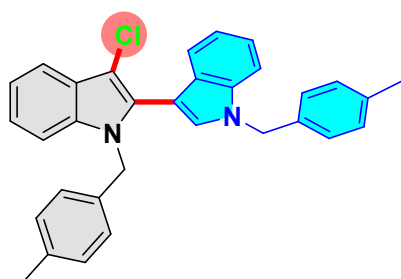

Brownish solid, (60.0 mg, 51% yield), m.p.: 139-141 °C;  $^1\text{H}$  NMR (500 MHz, Chloroform- $d$ )  $\delta$  7.74 (d,  $J = 9.0$  Hz, 1H), 7.60 (d,  $J = 7.9$  Hz, 1H), 7.38 (d,  $J = 8.2$  Hz, 1H), 7.30–7.27 (m, 2H), 7.25–7.23 (m, 2H), 7.21 (d,  $J = 8.0$  Hz, 1H), 7.13 (d,  $J = 8.2$  Hz, 3H), 7.03 (d,  $J = 8.1$  Hz, 2H), 7.01 (d,  $J = 7.9$  Hz, 2H), 6.82 (d,  $J = 8.0$  Hz, 2H), 5.29 (d,  $J = 6.5$  Hz, 4H), 2.36 (s, 3H), 2.30 (s, 3H).  $^{13}\text{C}$  NMR (125 MHz, Chloroform- $d$ )  $\delta$  137.57, 136.75, 136.44, 135.97, 135.17, 133.80, 129.54, 129.47, 129.29, 127.76, 127.03, 126.31, 126.04, 122.49, 122.45, 120.70, 120.47, 120.30, 118.07, 110.50, 110.23, 104.20, 50.16, 47.87, 21.17, 21.10. HRMS (ESI): Calcd. for  $\text{C}_{32}\text{H}_{27}\text{ClN}_2$   $[\text{M}+\text{H}]^+$ : 475.1935; found: 475.1935.

**(28) 1,1'-bis(4-(tert-butyl)benzyl)-3-chloro-1*H*,1'*H*-2,3'-biindole (B26)**

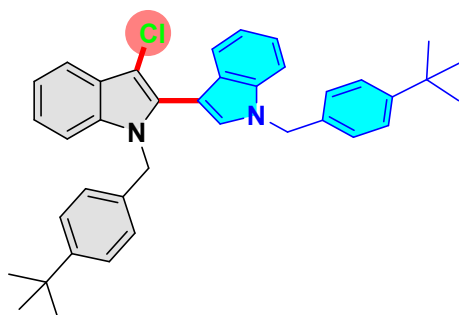

Brownish solid, (60.0 mg, 43% yield), m.p.: 151-153 °C;  $^1\text{H}$  NMR (500 MHz, Chloroform- $d$ )  $\delta$  7.71 (d,  $J = 9.0$  Hz, 1H), 7.56 (d,  $J = 7.9$  Hz, 1H), 7.37 (d,  $J = 8.3$  Hz, 1H),

1H), 7.35–7.32 (m, 2H), 7.31–7.29 (m, 1H), 7.25 (d,  $J = 1.9$  Hz, 1H), 7.23–7.21 (m, 2H), 7.20–7.18 (m, 2H), 7.18–7.14 (m, 2H), 7.06 (d,  $J = 8.3$  Hz, 2H), 6.85 (d,  $J = 8.3$  Hz, 2H), 5.30 (d,  $J = 3.0$  Hz, 4H), 1.31 (s, 9H), 1.25 (s, 9H).  $^{13}\text{C}$  NMR (125 MHz, Chloroform-d)  $\delta$  150.82, 150.09, 136.45, 135.96, 135.17, 134.01, 129.62, 127.72, 126.61, 126.28, 125.94, 125.77, 125.47, 122.44, 122.42, 120.66, 120.42, 120.25, 118.05, 110.52, 110.21, 104.26, 50.01, 47.80, 34.57, 34.45, 31.35, 31.34. HRMS (ESI): Calcd. for  $\text{C}_{38}\text{H}_{39}\text{ClN}_2$   $[\text{M}+\text{H}]^+$ : 559.2874; found: 559.2874.

**(29) 3-chloro-1,1'-bis(4-methoxybenzyl)-1*H*,1'*H*-2,3'-biindole (B27)**

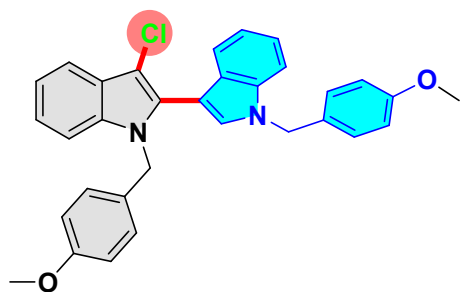

Brownish solid, (73.0 mg, 58% yield), m.p.: 133-136 °C;  $^1\text{H}$  NMR (500 MHz, Chloroform-d)  $\delta$  7.71 (d,  $J = 9.0$  Hz, 1H), 7.57 (d,  $J = 7.9$  Hz, 1H), 7.39 (d,  $J = 8.2$  Hz, 1H), 7.29–7.27 (m, 1H), 7.25–7.16 (m, 4H), 7.10 (s, 1H), 7.07 (d,  $J = 8.6$  Hz, 2H), 6.84 (d,  $J = 8.7$  Hz, 2H), 6.81 (d,  $J = 8.7$  Hz, 2H), 6.70 (d,  $J = 8.7$  Hz, 2H), 5.25 (d,  $J = 4.9$  Hz, 4H), 3.80 (s, 3H), 3.74 (s, 3H).  $^{13}\text{C}$  NMR (125 MHz, Chloroform-d)  $\delta$  159.27, 158.68, 136.39, 135.91, 130.22, 129.30, 128.74, 128.47, 127.74, 127.30, 122.47, 122.43, 120.68, 120.47, 120.28, 118.06, 114.25, 113.97, 110.45, 110.20, 104.18, 55.30, 55.22, 49.84, 47.52. HRMS (ESI): Calcd. for  $\text{C}_{32}\text{H}_{27}\text{ClN}_2\text{O}_2$   $[\text{M}+\text{H}]^+$ : 507.1833; found: 507.1833.

**(30) 3-chloro-1,1'-bis(4-fluorobenzyl)-1*H*,1'*H*-2,3'-biindole (B28)**

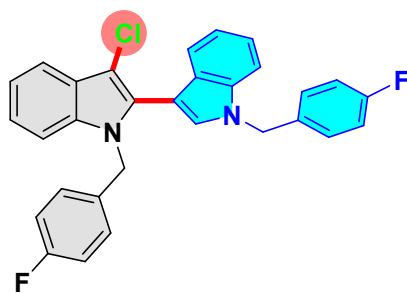

Brownish solid, (81.0 mg, 67% yield), m.p.: 141-143 °C;  $^1\text{H}$  NMR (500 MHz, Chloroform- $d$ )  $\delta$  7.76 (d,  $J$  = 8.8 Hz, 1H), 7.60 (d,  $J$  = 7.9 Hz, 1H), 7.39 (d,  $J$  = 8.3 Hz, 1H), 7.32–7.27 (m, 4H), 7.24 (d,  $J$  = 7.1 Hz, 1H), 7.12–7.09 (m, 3H), 7.05–7.01 (m, 2H), 6.91–6.84 (m, 4H), 5.31 (s, 4H).  $^{13}\text{C}$  NMR (125 MHz, Chloroform- $d$ )  $\delta$  137.11, 136.33, 135.82 (d,  $J$  = 11.25 Hz), 132.07, 131.74, 131.59, 130.48, 130.01, 129.20, 128.30, 128.60, 127.66 (d,  $J$  = 8.75 Hz), 126.33, 122.81 (d,  $J$  = 3.75 Hz), 121.91, 121.07, 120.72 (d,  $J$  = 25 Hz), 118.29, 110.17 (d,  $J$  = 15 Hz), 105.36, 104.46, 49.73, 47.51.  $^{19}\text{F}$  NMR (471 MHz, Chloroform- $d$ )  $\delta$  -114.09, -115.17. HRMS (ESI): Calcd. for  $\text{C}_{30}\text{H}_{21}\text{ClF}_2\text{N}_2$   $[\text{M}+\text{H}]^+$ : 483.1434; found: 483.1434.

**(31) 3-chloro-1,1'-bis(4-(trifluoromethyl)benzyl)-1H,1'H-2,3'-biindole (B29)**

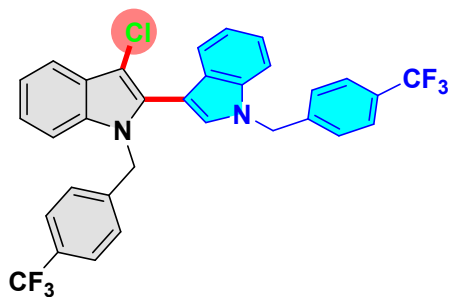

Brownish solid, (96.0 mg, 66% yield), m.p.: 137-139 °C;  $^1\text{H}$  NMR (500 MHz, Chloroform- $d$ )  $\delta$  7.78 (d,  $J$  = 8.8 Hz, 1H), 7.58 (t,  $J$  = 8.7 Hz, 3H), 7.45 (d,  $J$  = 8.2 Hz, 2H), 7.34 (d,  $J$  = 8.1 Hz, 1H), 7.32 – 7.27 (m, 3H), 7.26 – 7.22 (m, 2H), 7.17 (d,  $J$  = 8.1 Hz, 2H), 7.14 (s, 1H), 6.98 (d,  $J$  = 8.1 Hz, 2H), 5.38 (d,  $J$  = 5.2 Hz, 4H).  $^{13}\text{C}$  NMR (125 MHz, Chloroform- $d$ )  $\delta$  142.13, 140.89, 136.40 (d,  $J$  = 25 Hz), 135.91 (d,  $J$  = 3.75 Hz), 130.43 (d,  $J$  = 2.5 Hz), 130.16, 129.77, 129.51, 129.33, 127.68, 127.02, 126.29 (d,  $J$  = 25 Hz), 125.92 (d,  $J$  = 3.75 Hz), 125.63 (d,  $J$  = 3.75 Hz), 121.03, 120.82, 120.61, 118.42, 110.18 (d,  $J$  = 11.25 Hz), 105.67, 104.64, 49.81, 47.70.  $^{19}\text{F}$  NMR (471 MHz,

Chloroform-d)  $\delta$  -62.49, -62.58. HRMS (ESI): Calcd. for  $C_{32}H_{21}ClF_6N_2$   $[M+H]^+$ : 583.1370; found: 583.1370.

**(32) 3-chloro-1,1'-bis(2,4,6-trimethylbenzyl)-1*H*,1'*H*-2,3'-biindole (B30)**

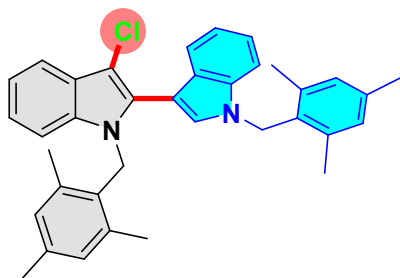

Brownish solid, (78.0 mg, 59% yield), m.p.: 136-138 °C;  $^1H$  NMR (500 MHz, Chloroform-d)  $\delta$  7.69 – 7.59 (m, 3H), 7.42 (t,  $J$  = 7.7 Hz, 1H), 7.32 (t,  $J$  = 7.5 Hz, 1H), 7.15 (t,  $J$  = 7.4 Hz, 1H), 7.03 (d,  $J$  = 6.6 Hz, 3H), 6.92 (s, 1H), 6.81 (d,  $J$  = 19.6 Hz, 3H), 5.38 (s, 4H), 2.40 (s, 3H), 2.33 (s, 6H), 2.28 (s, 3H), 2.04 (s, 6H).  $^{13}C$  NMR (125 MHz, Chloroform-d)  $\delta$  138.11, 137.06, 136.73, 135.24, 130.01, 129.58, 129.57, 128.40, 128.30, 128.01, 126.12, 122.23, 122.08, 120.64, 120.60, 119.77, 117.83, 110.95, 109.89, 104.20, 45.18, 44.23, 21.12, 20.92, 20.18, 19.69. HRMS (ESI): Calcd. for  $C_{36}H_{35}ClN_2$   $[M+H]^+$ : 531.2561; found: 531.2561.

**(33) 3-bromo-1,1'-dimethyl-1*H*,1'*H*-2,3'-biindole (B31)**

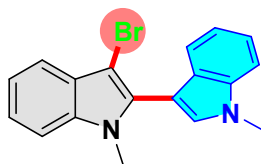

Yellow solid, (57.0 mg, 68% yield), m.p.: 116-119 °C;  $^1H$  NMR (500 MHz, Chloroform-d)  $\delta$  7.66 (d,  $J$  = 7.8 Hz, 1H), 7.54 (d,  $J$  = 8.0 Hz, 1H), 7.47 (d,  $J$  = 8.3 Hz, 1H), 7.41 (d,  $J$  = 8.1 Hz, 1H), 7.36 (t,  $J$  = 8.3 Hz, 1H), 7.35 (s, 1H), 7.33 (t,  $J$  = 8.3 Hz, 1H), 7.29 (t,  $J$  = 7.8 Hz, 1H), 7.23 (t,  $J$  = 7.5 Hz, 1H), 3.95 (s, 3H), 3.72 (s, 3H).  $^{13}C$  NMR (125 MHz, Chloroform-d)  $\delta$  138.11, 137.06, 136.73, 135.24, 130.01, 129.58, 129.57, 128.40, 128.30, 128.01, 126.12, 122.23, 122.08, 120.64, 120.60, 119.77,

117.83, 110.95, 109.89, 104.20, 45.18, 44.23, 21.12, 20.92, 20.18, 19.69. HRMS (ESI):  
Calcd. for  $C_{18}H_{15}BrN_2 [M+H]^+$ : 339.0491; found: 339.0491.

**(34) 3-chloro-1,1',2'-trimethyl-1*H*,1'*H*-2,3'-biindole (B33)**

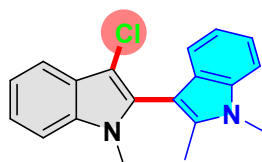

White solid, (26.0 mg, 34% yield), m.p.: 119-121 °C;  $^1H$  NMR (500 MHz, Chloroform-*d*)  $\delta$  7.72 (d,  $J = 7.8$  Hz, 1H), 7.42 (t,  $J = 8.0$  Hz, 2H), 7.36 (d,  $J = 7.7$  Hz, 1H), 7.33 (d,  $J = 8.2$  Hz, 1H), 7.28 – 7.25 (m, 2H), 7.17 (t,  $J = 7.9$  Hz, 1H), 3.83 (s, 3H), 3.63 (s, 3H), 2.44 (s, 3H).  $^{13}C$  NMR (125 MHz, Chloroform-*d*)  $\delta$  137.74, 136.91, 136.38, 131.51, 127.60, 125.91, 122.12, 121.35, 120.20, 119.93, 119.22, 117.92, 109.53, 109.15, 104.51, 101.48, 31.24, 29.94, 11.66. HRMS (ESI): Calcd. for  $C_{19}H_{17}ClN_2 [M+H]^+$ : 309.1153; found: 309.1153.

**(35) 3-chloro-1,1',2'-trimethyl-1*H*,1'*H*-2,3'-biindole (B34)**

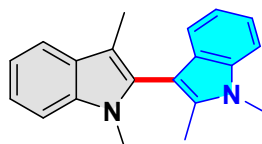

White solid, (22.0 mg, 31% yield), m.p.: 110-112 °C;  $^1H$  NMR (500 MHz, Chloroform-*d*)  $\delta$  7.66 (d,  $J = 7.8$  Hz, 1H), 7.39 (t,  $J = 8.0$  Hz, 2H), 7.33 (d,  $J = 7.8$  Hz, 1H), 7.30 – 7.25 (m, 3H), 7.19 (t,  $J = 7.4$  Hz, 1H), 7.13 (t,  $J = 7.8$  Hz, 1H), 3.83 (s, 3H), 3.56 (s, 3H), 2.37 (s, 3H), 2.20 (s, 3H).  $^{13}C$  NMR (125 MHz, Chloroform-*d*)  $\delta$  137.39, 136.83, 136.79, 131.99, 128.72, 128.26, 121.11, 120.95, 119.85, 119.40, 118.58, 118.45, 109.54, 109.03, 108.88, 103.72, 30.59, 29.89, 11.30, 9.66. HRMS (ESI): Calcd. for  $C_{20}H_{20}N_2 [M+H]^+$ : 289.1699; found: 289.1699.

**(36) 4-(1,1'-dimethyl-1*H*,1'*H*-[2,3'-biindol]-3-yl)-*N,N*-diphenylaniline (F)**

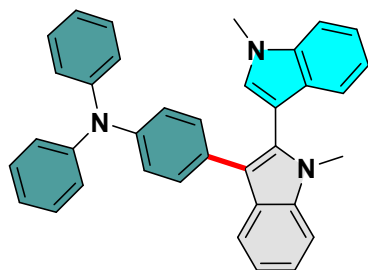

Yellow solid, (35.0 mg, 28% yield), m.p.: 130-132 °C;  $^1\text{H}$  NMR (500 MHz, )  $\delta$  7.88 (d,  $J = 7.9$  Hz, 1H), 7.44 (d,  $J = 8.1$  Hz, 1H), 7.39 (d,  $J = 8.2$  Hz, 1H), 7.32–7.30 (m, 3H), 7.27 (d,  $J = 8.2$  Hz, 1H), 7.26 (s, 1H), 7.24–7.22 (m, 5H), 7.12–7.10 (m, 2H), 7.08–7.06 (m, 4H), 6.99–6.94 (m, 4H), 3.88 (s, 3H), 3.71 (s, 3H).  $^{13}\text{C}$  NMR (125 MHz, Chloroform-d)  $\delta$  147.97, 144.95, 137.50, 136.89, 130.86, 130.14, 129.83, 129.07, 128.19, 127.17, 124.36, 123.83, 122.26, 121.98, 121.66, 120.61, 119.92, 119.82, 119.39, 109.46, 109.42, 105.96, 33.05, 30.83. HRMS (ESI): Calcd. for  $\text{C}_{36}\text{H}_{29}\text{N}_3$   $[\text{M}+\text{H}]^+$ : 504.2434; found: 504.2434.

## 10. NMR spectra of the obtained compounds.

### (1) $^1\text{H-NMR}$ (500 MHz, $\text{CDCl}_3$ ) spectrum of B-I-1

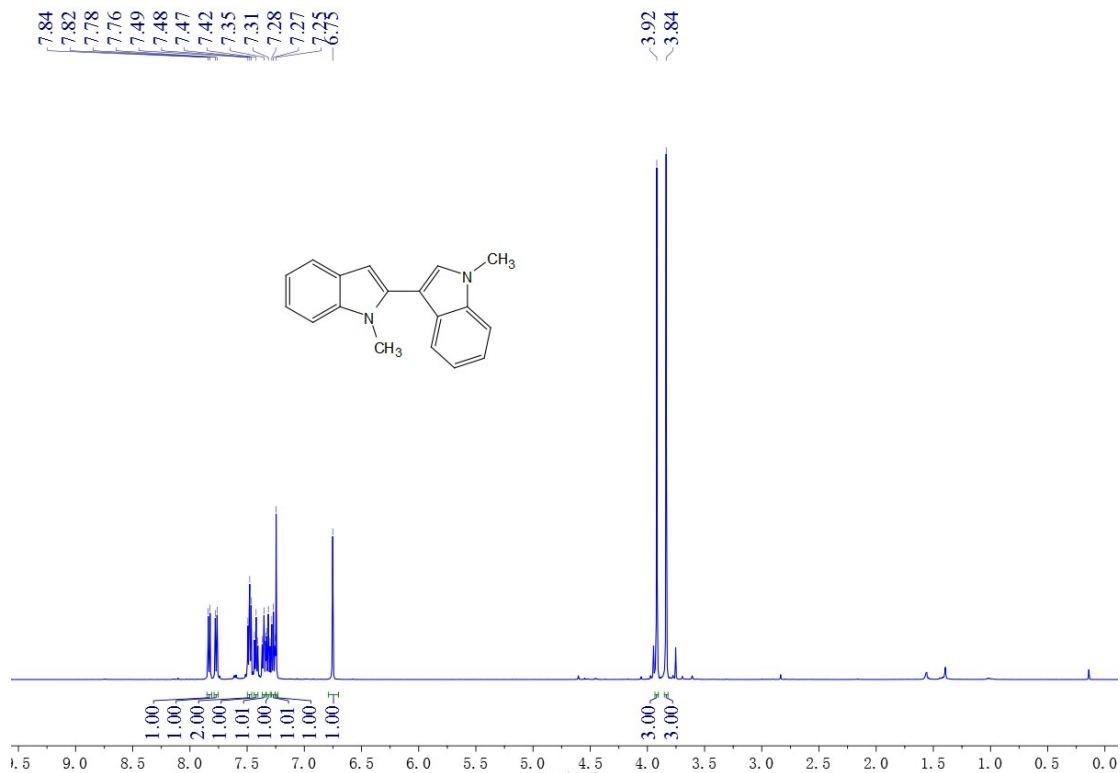

### (2) $^{13}\text{C-NMR}$ (125 MHz, $\text{CDCl}_3$ ) spectrum of B1-1

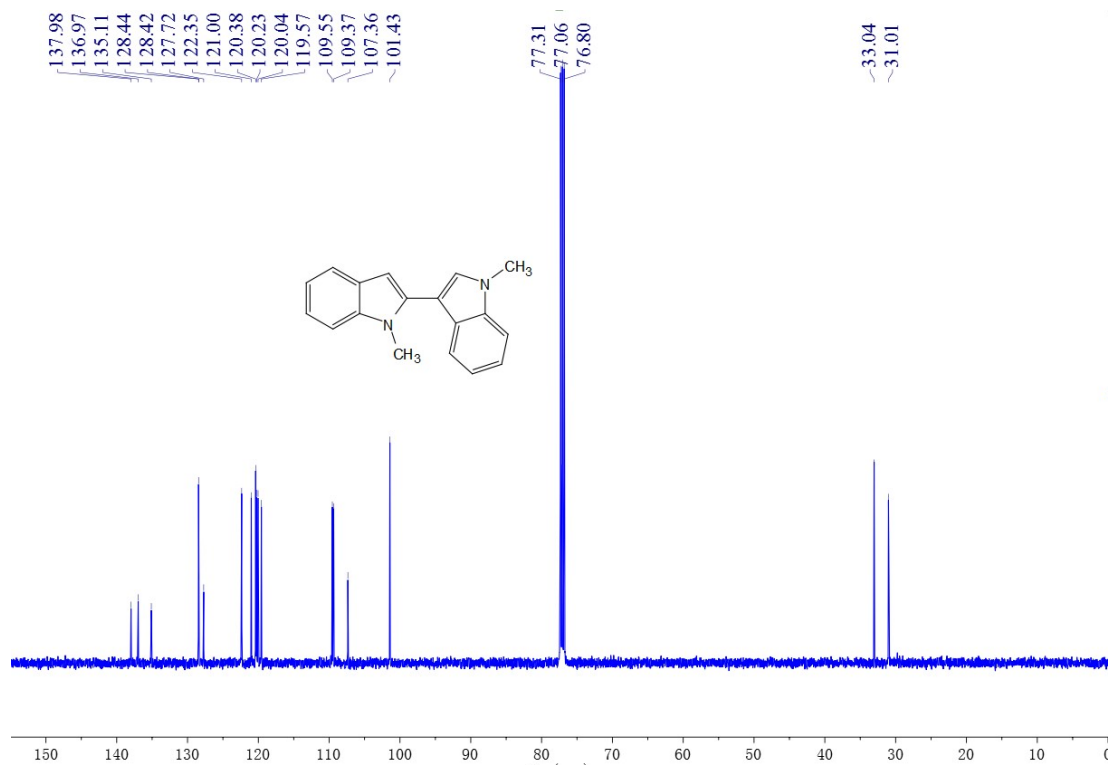

**(3)  $^1\text{H-NMR}$  (500 MHz,  $\text{CDCl}_3$ ) spectrum of A32**

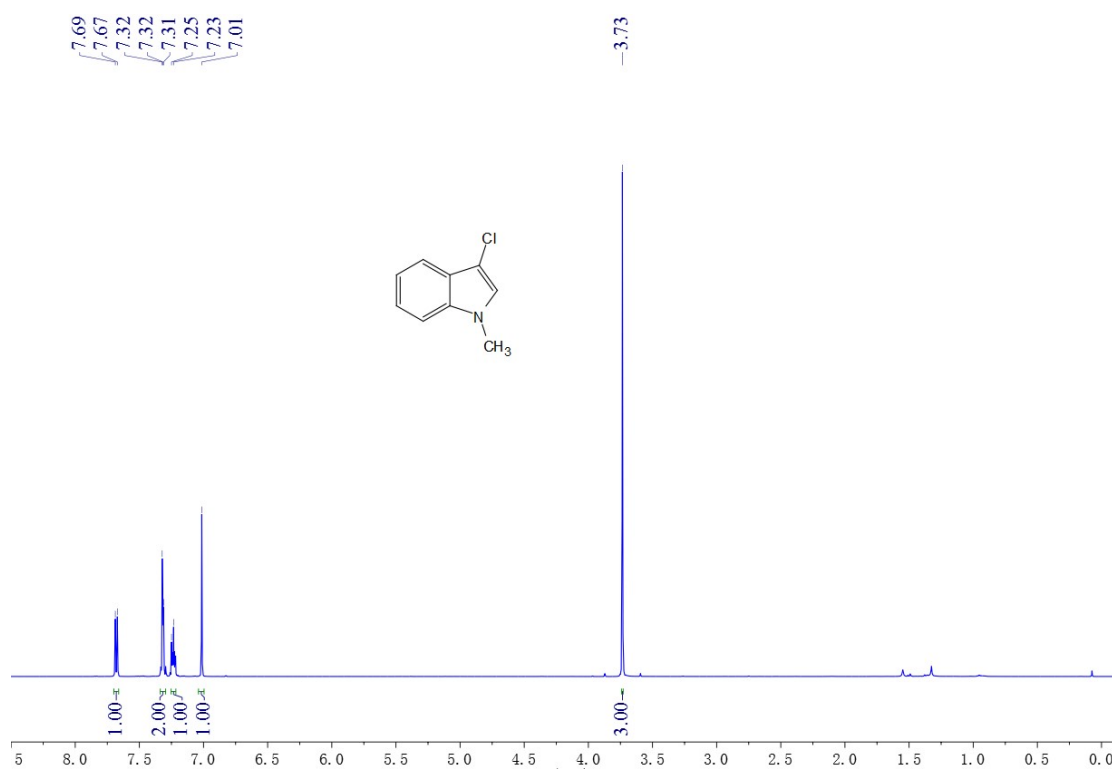

**(4)  $^{13}\text{C-NMR}$  (125 MHz,  $\text{CDCl}_3$ ) spectrum of A32**

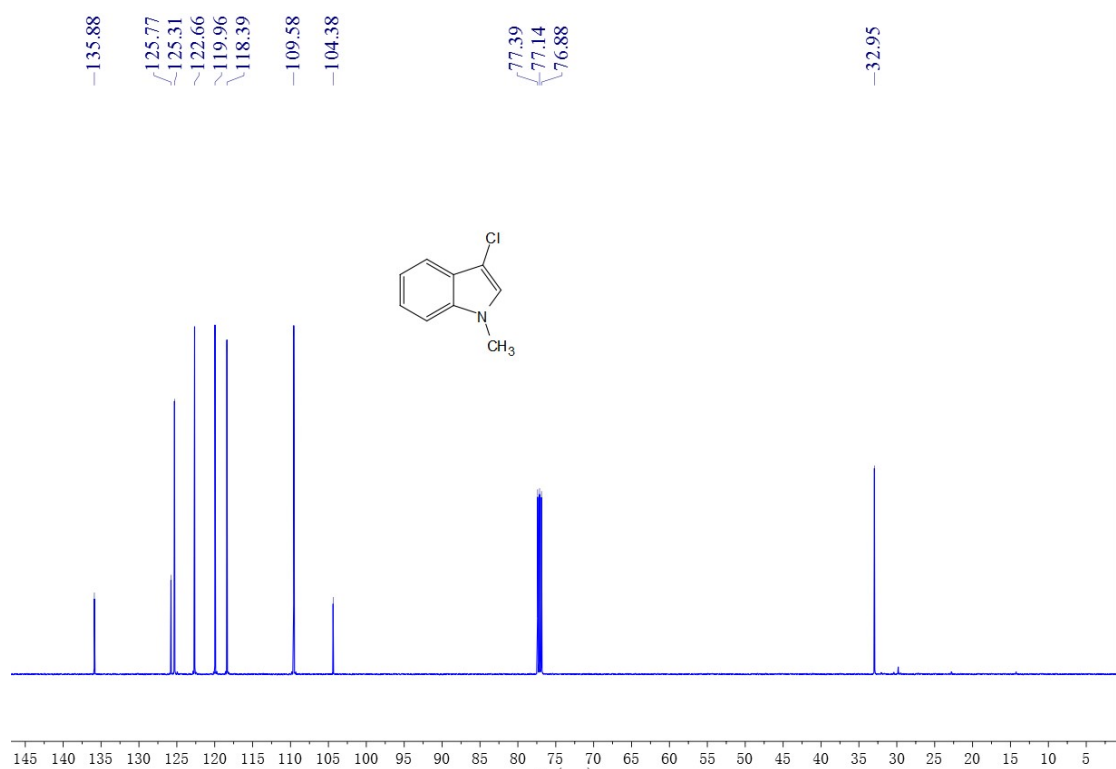



(5)  $^1\text{H-NMR}$  (500 MHz,  $\text{CDCl}_3$ ) spectrum of B1

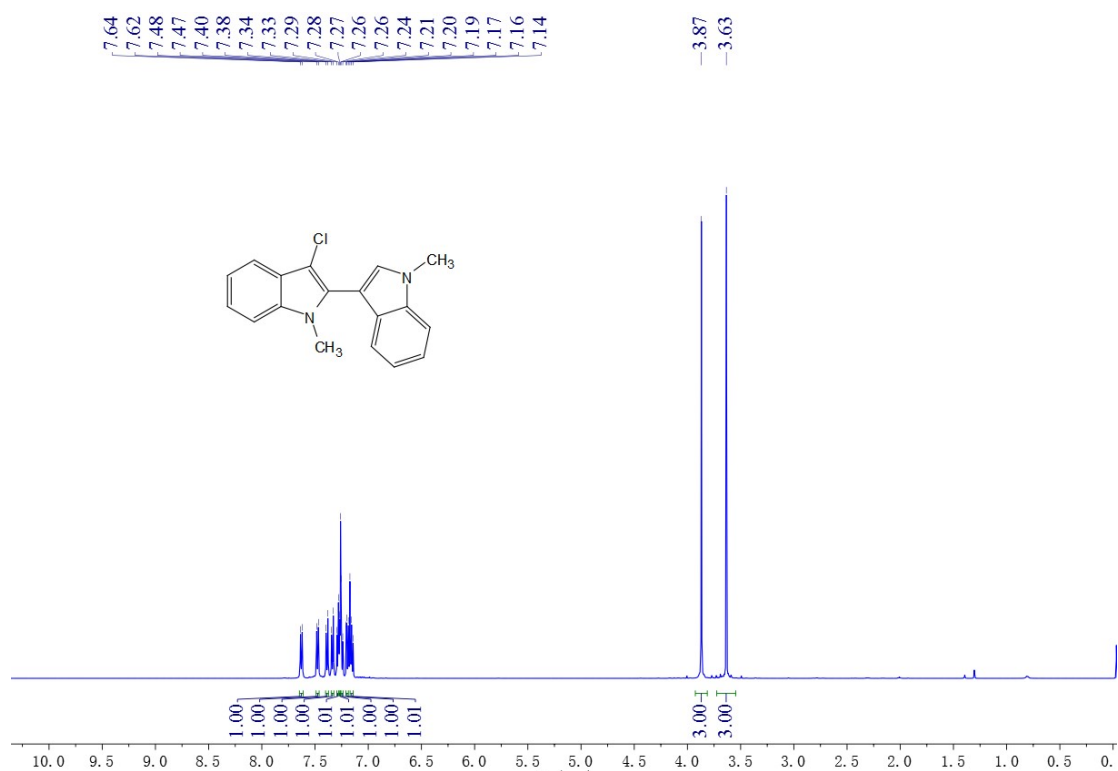

(6)  $^{13}\text{C-NMR}$  (125 MHz,  $\text{CDCl}_3$ ) spectrum of B1

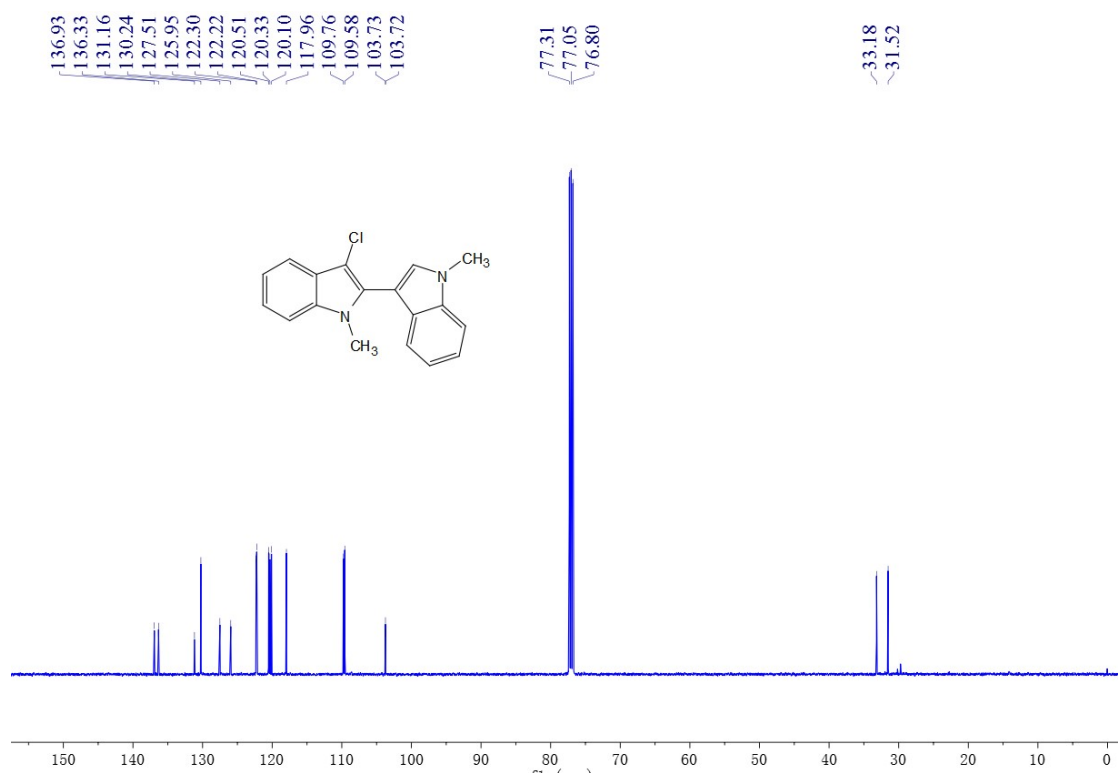

**(7)  $^1\text{H-NMR}$  (500 MHz,  $\text{CDCl}_3$ ) spectrum of B2**

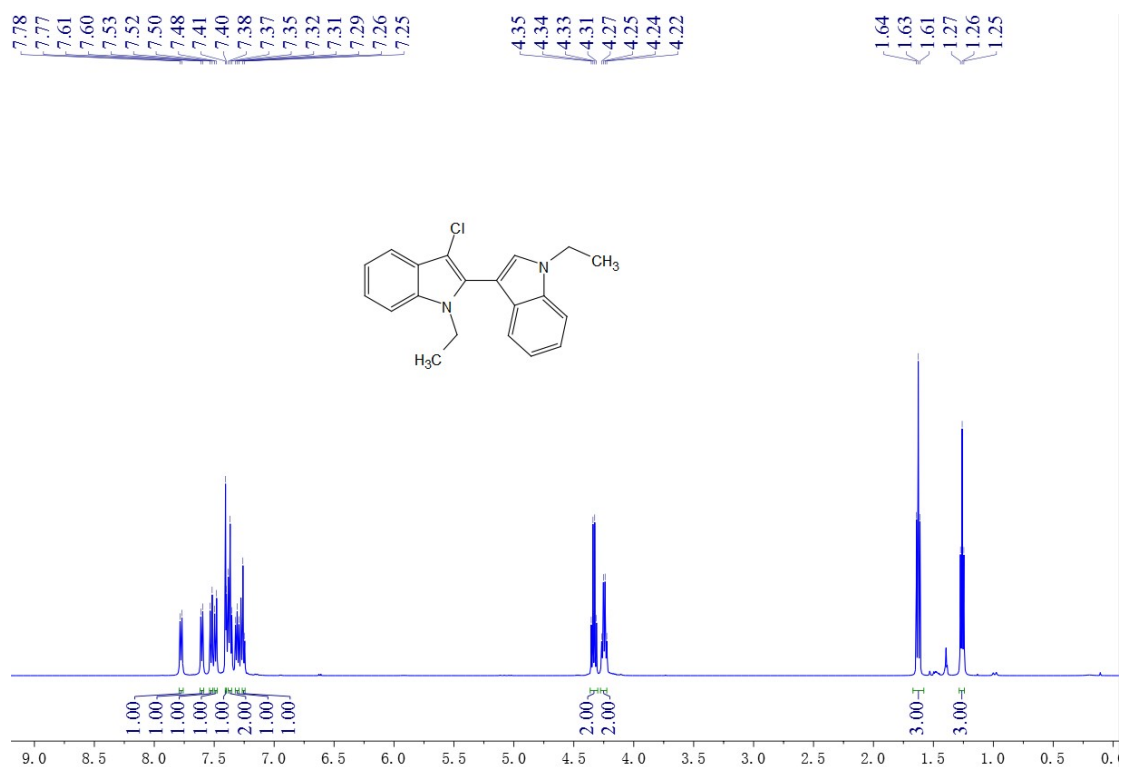

**(8)  $^{13}\text{C-NMR}$  (125 MHz,  $\text{CDCl}_3$ ) spectrum of B2**

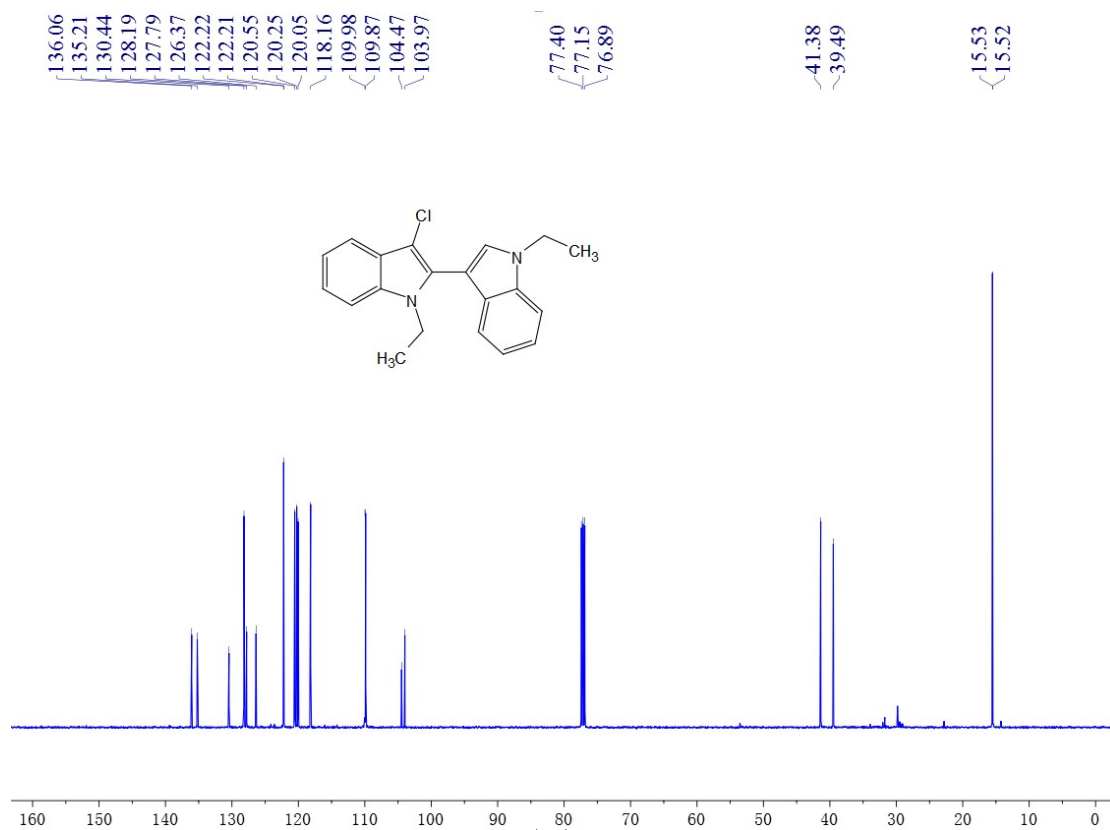

**(9)  $^1\text{H-NMR}$  (500 MHz,  $\text{CDCl}_3$ ) spectrum of B3**

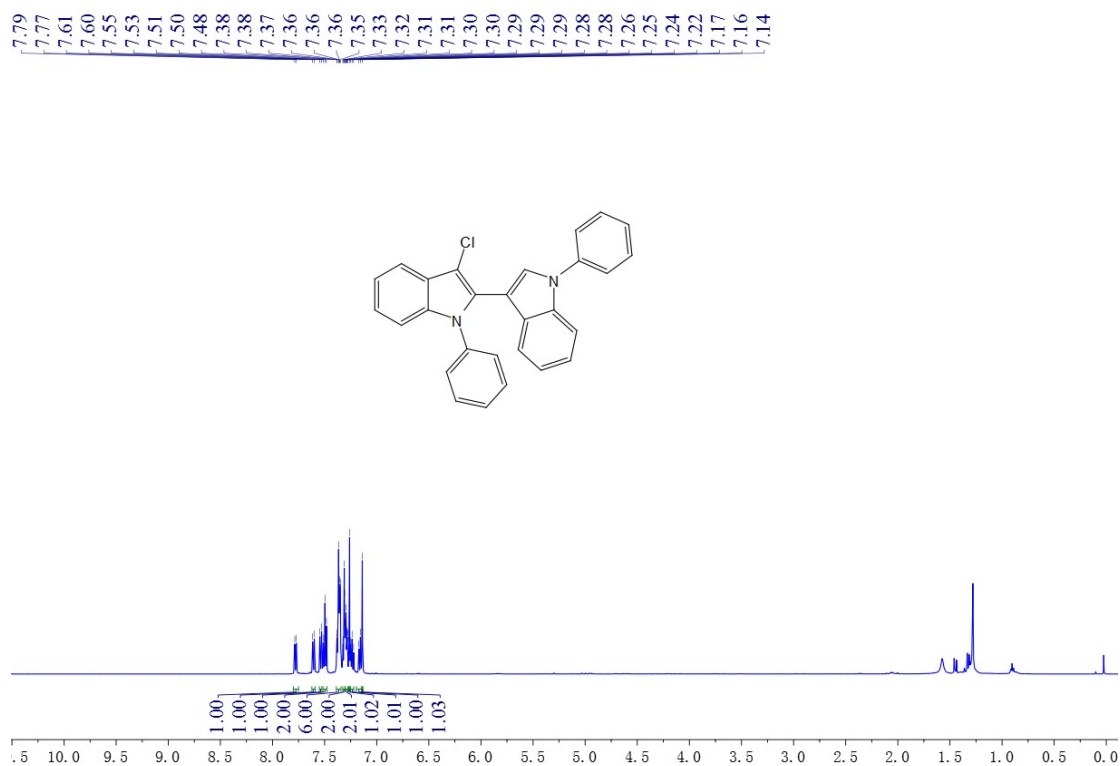

**(10)  $^{13}\text{C-NMR}$  (125 MHz,  $\text{CDCl}_3$ ) spectrum of B3**

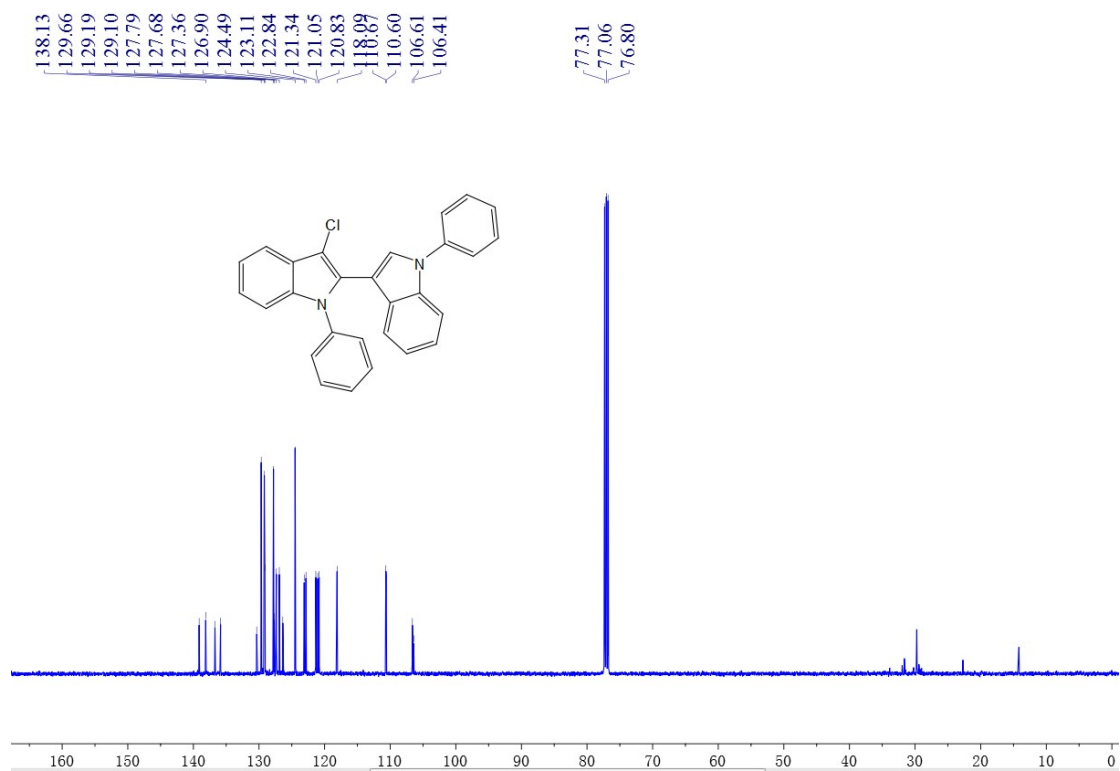

**(11)  $^1\text{H-NMR}$  (500 MHz,  $\text{CDCl}_3$ ) spectrum of B4**

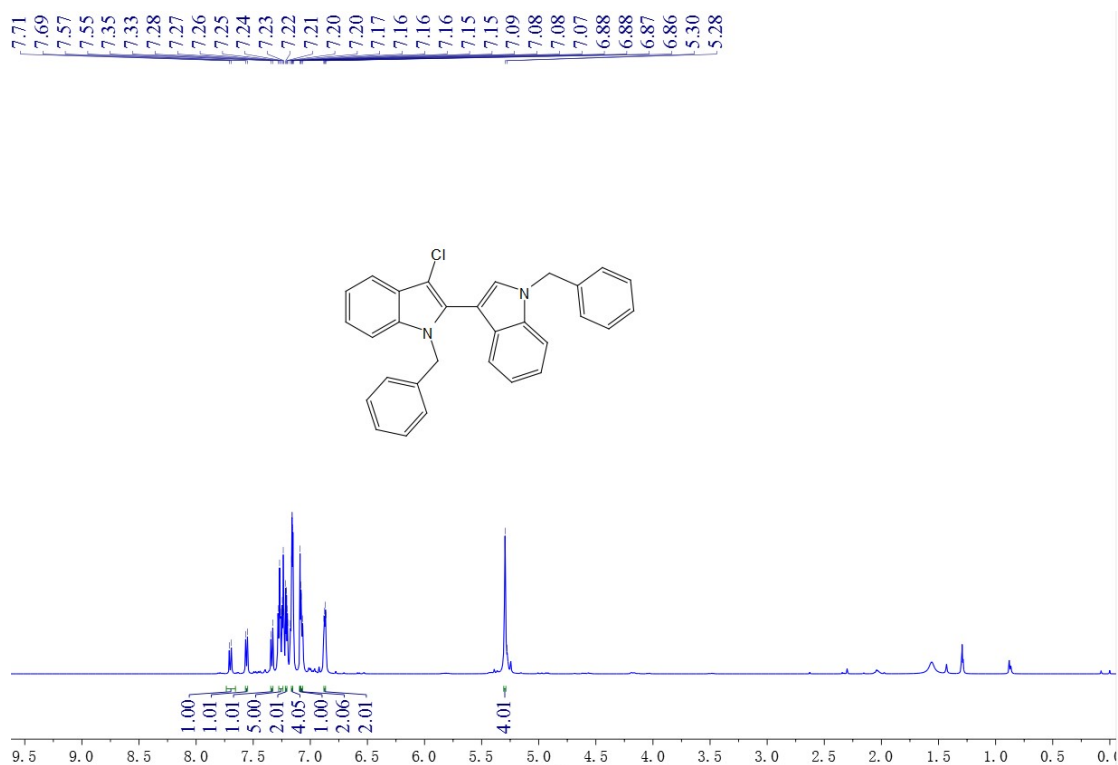

**(12)  $^{13}\text{C-NMR}$  (125 MHz,  $\text{CDCl}_3$ ) spectrum of B4**

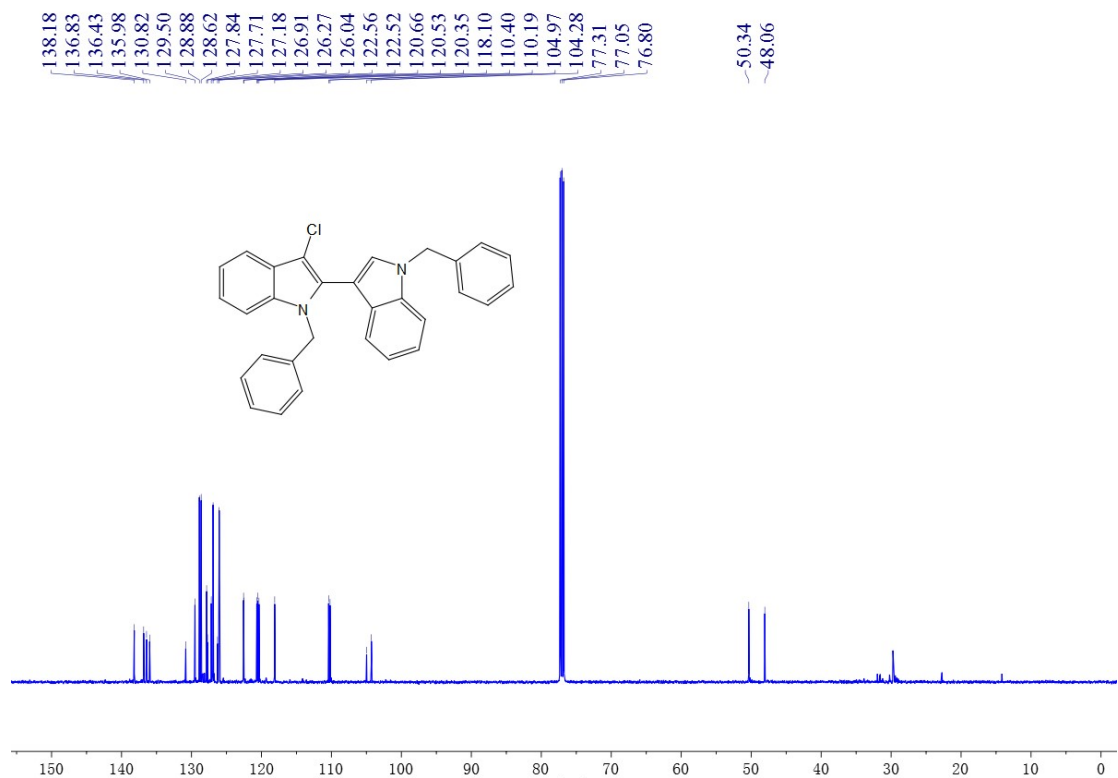

**(13)  $^1\text{H-NMR}$  (500 MHz,  $\text{CDCl}_3$ ) spectrum of B5**

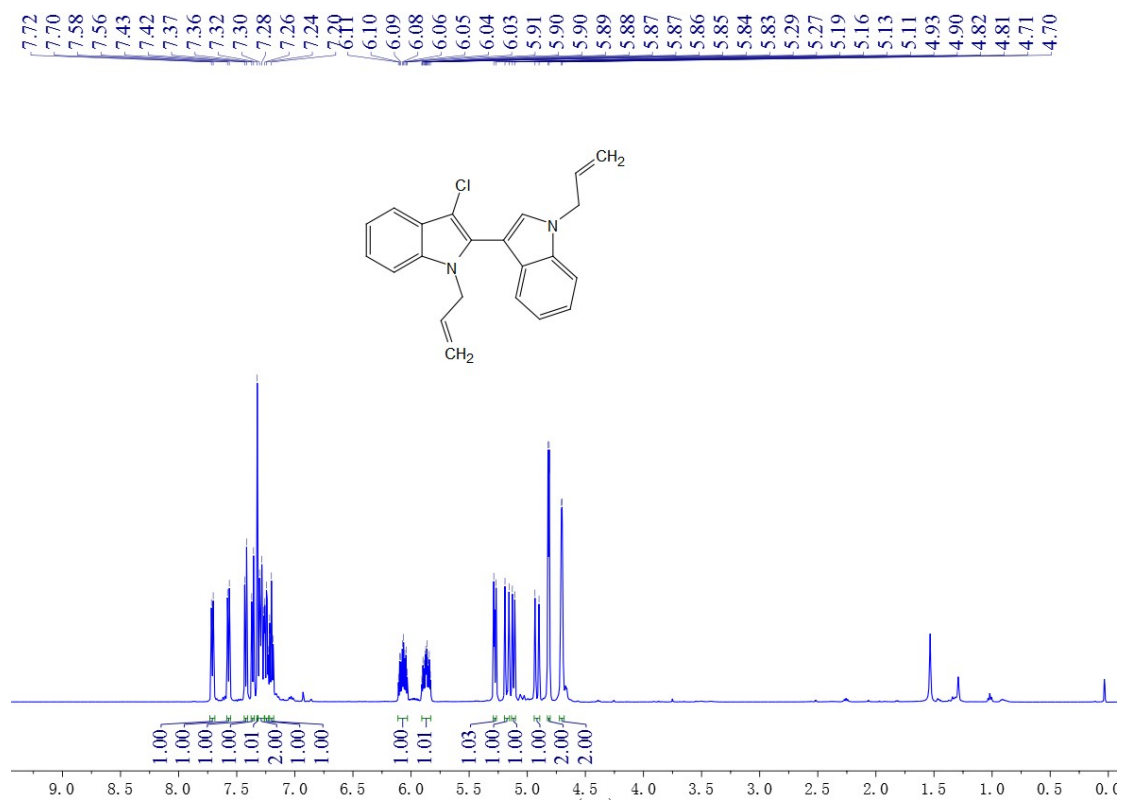

**(14)  $^{13}\text{C-NMR}$  (125 MHz,  $\text{CDCl}_3$ ) spectrum of B5**

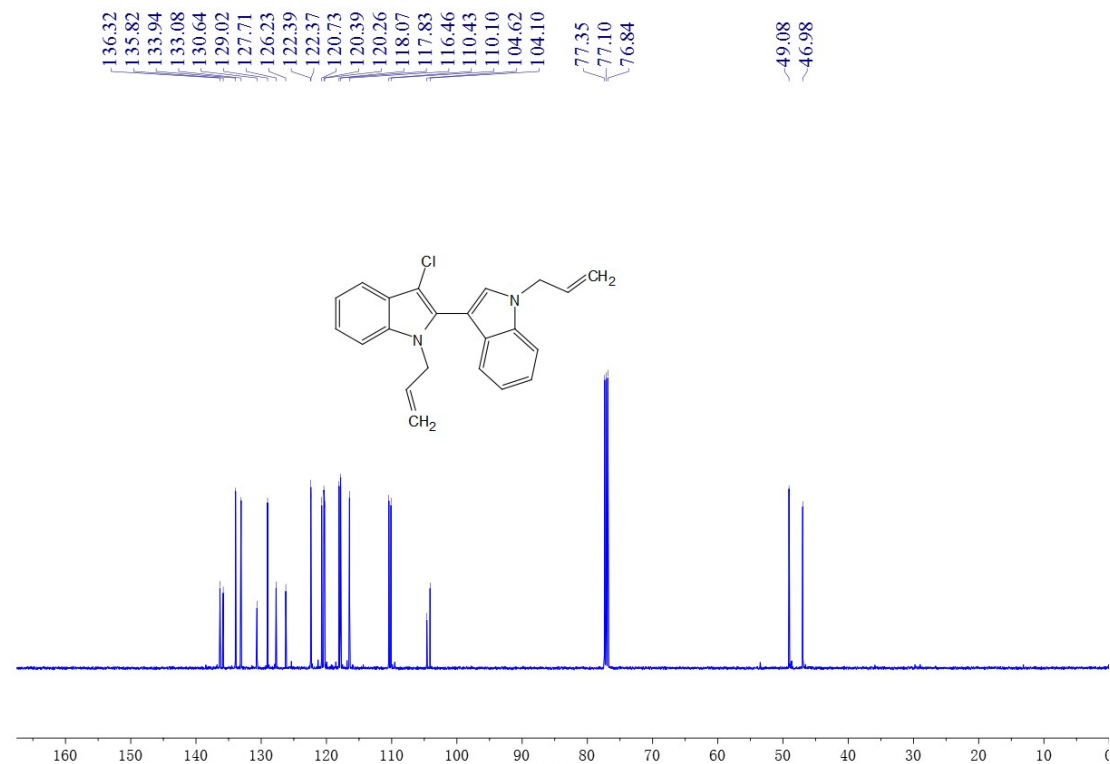

**(15)  $^1\text{H-NMR}$  (500 MHz,  $\text{CDCl}_3$ ) spectrum of B6**

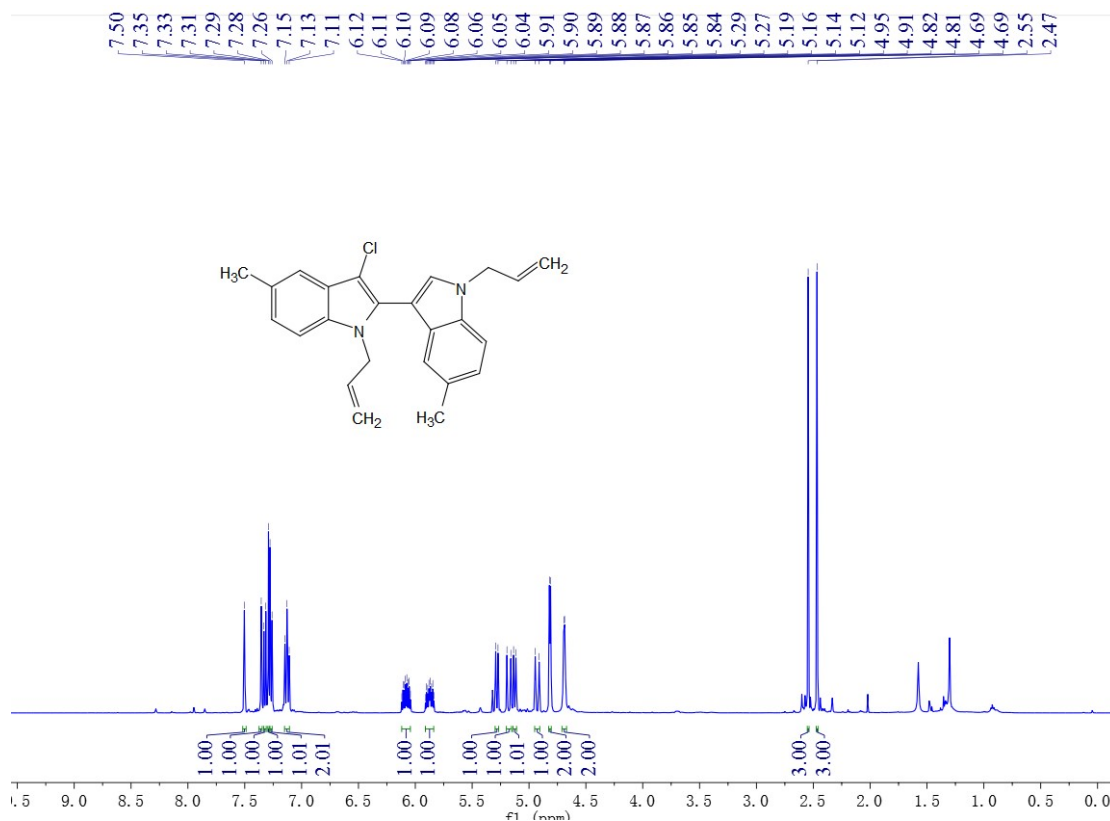

**(16)  $^{13}\text{C-NMR}$  (125 MHz,  $\text{CDCl}_3$ ) spectrum of B6**

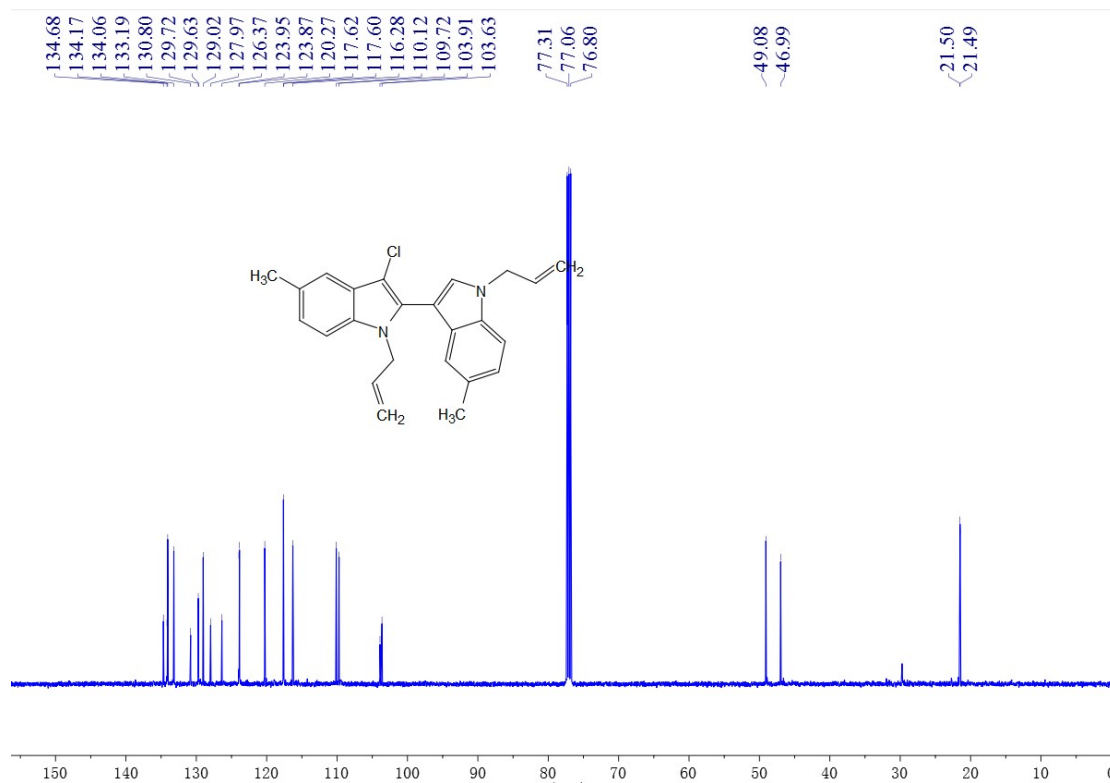

**(17)  $^1\text{H-NMR}$  (500 MHz,  $\text{CDCl}_3$ ) spectrum of B7**

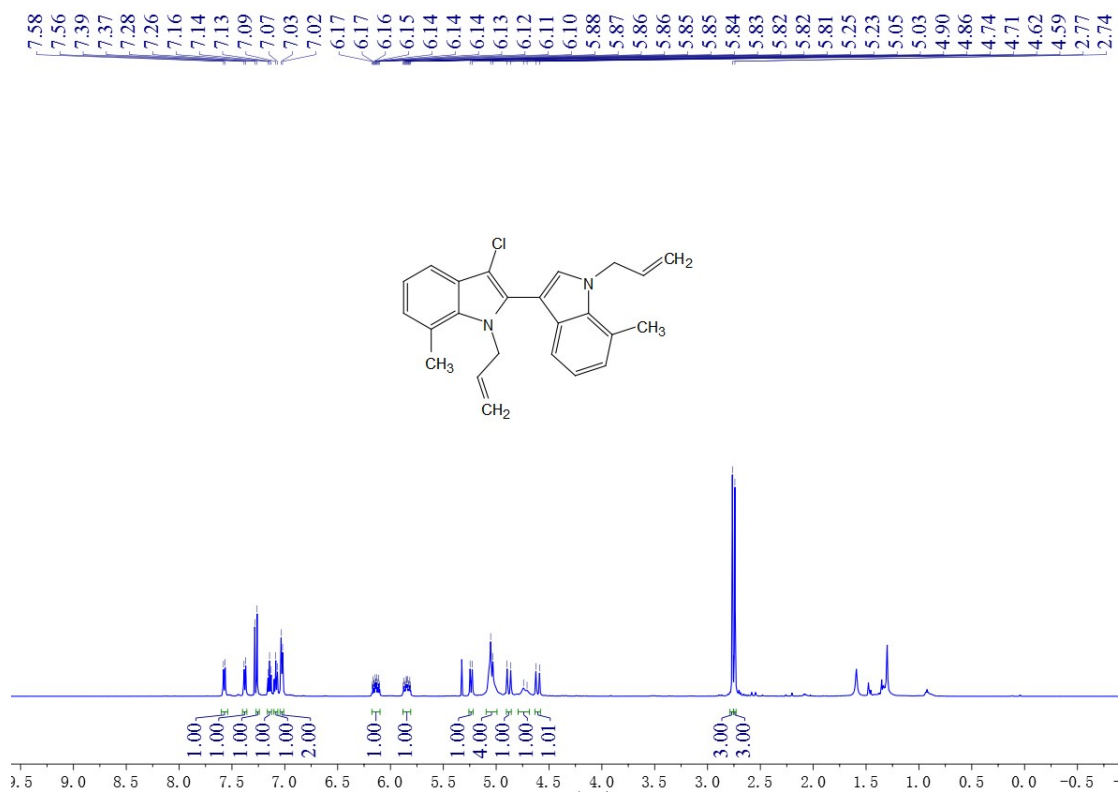

**(18)  $^{13}\text{C-NMR}$  (125 MHz,  $\text{CDCl}_3$ ) spectrum of B7**

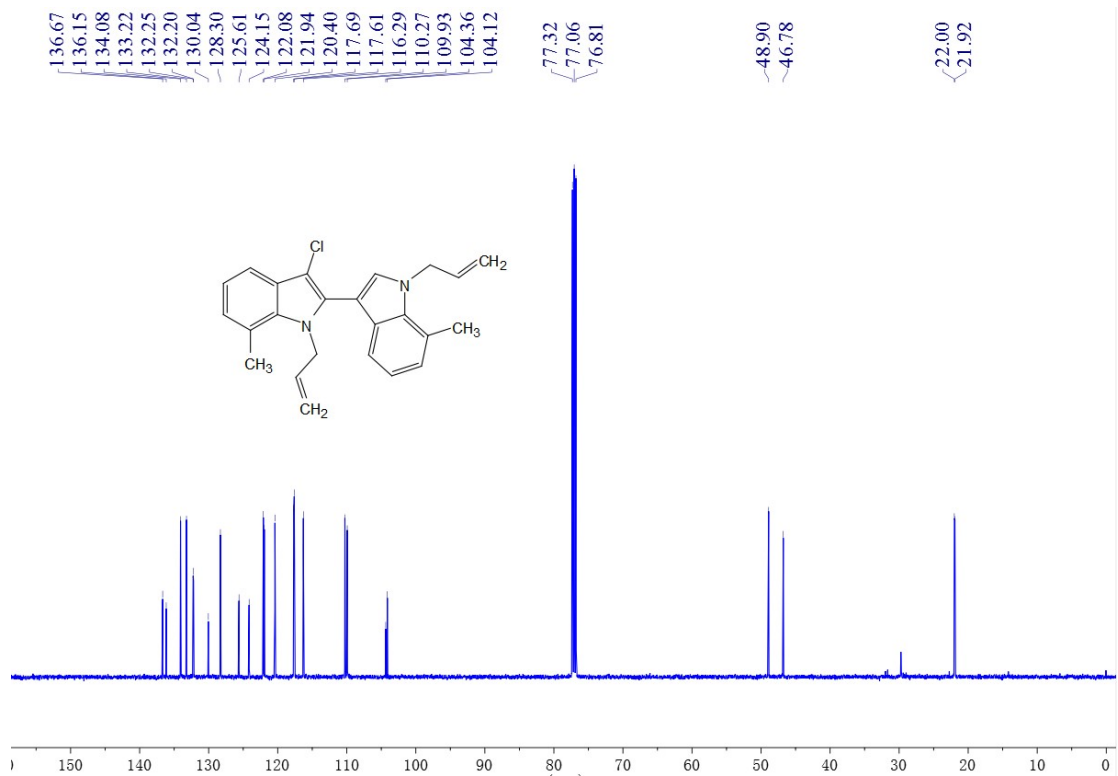

**(19)  $^1\text{H-NMR}$  (500 MHz,  $\text{CDCl}_3$ ) spectrum of B8**

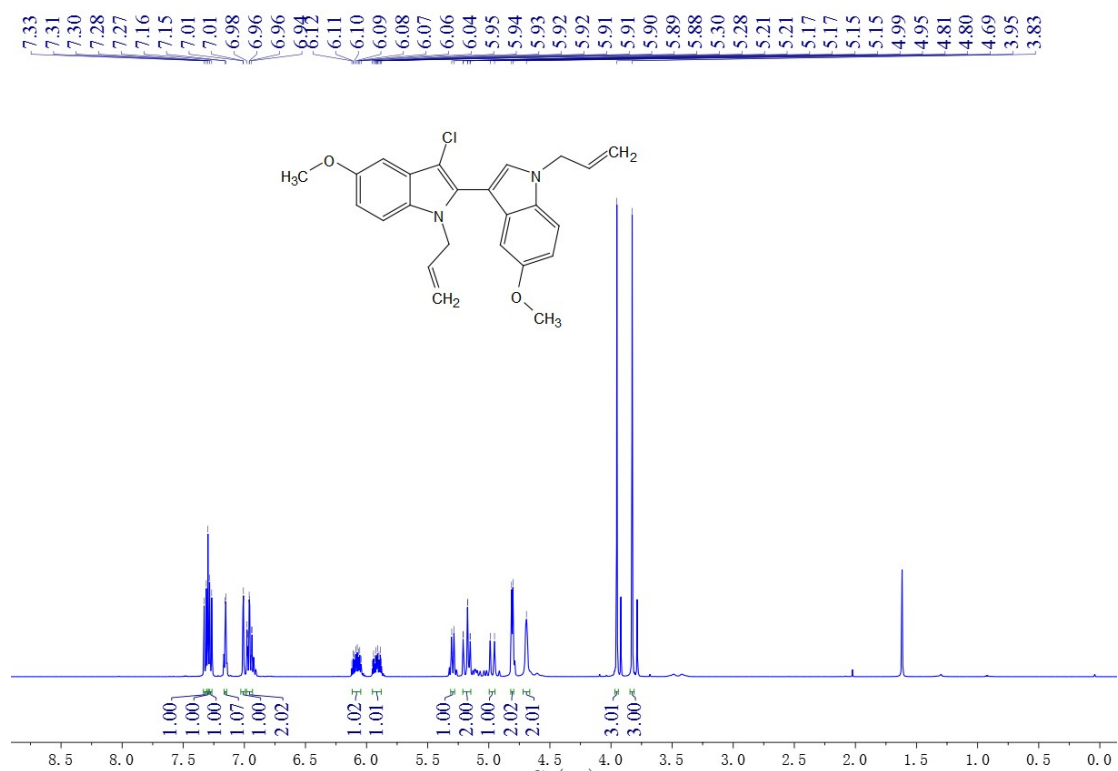

**(20)  $^{13}\text{C-NMR}$  (125 MHz,  $\text{CDCl}_3$ ) spectrum of B8**

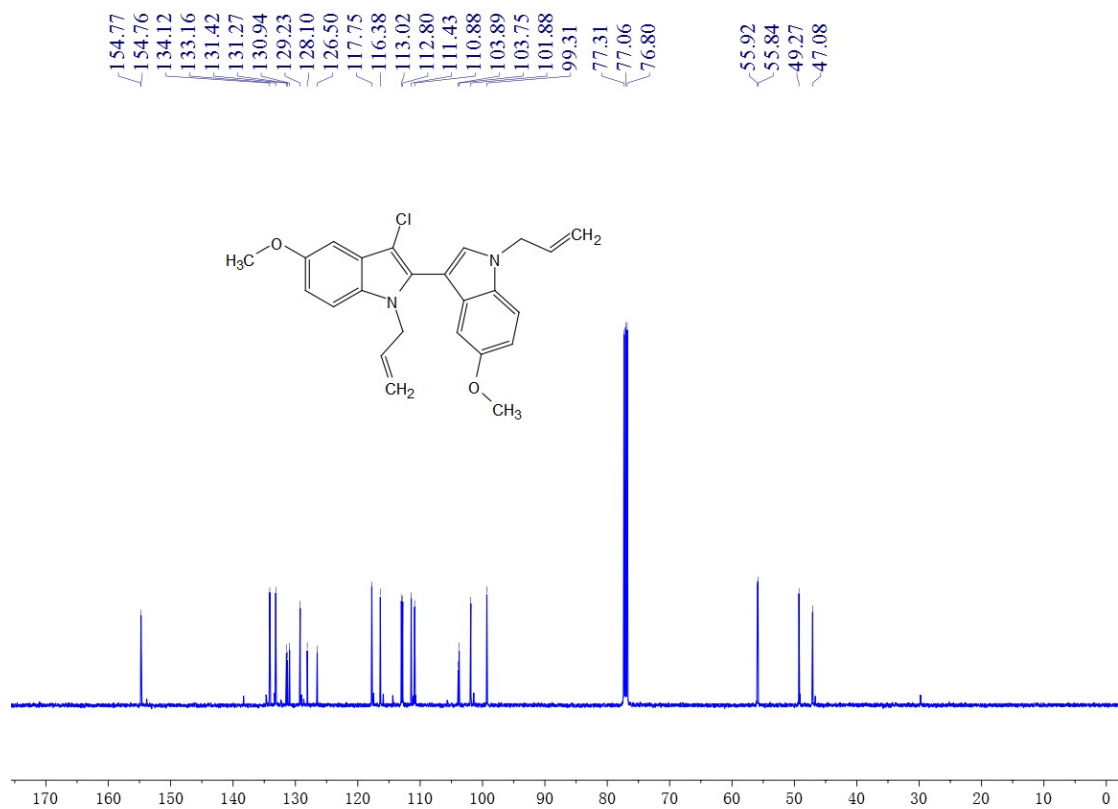



**(21)  $^1\text{H-NMR}$  (500 MHz,  $\text{CDCl}_3$ ) spectrum of B9**

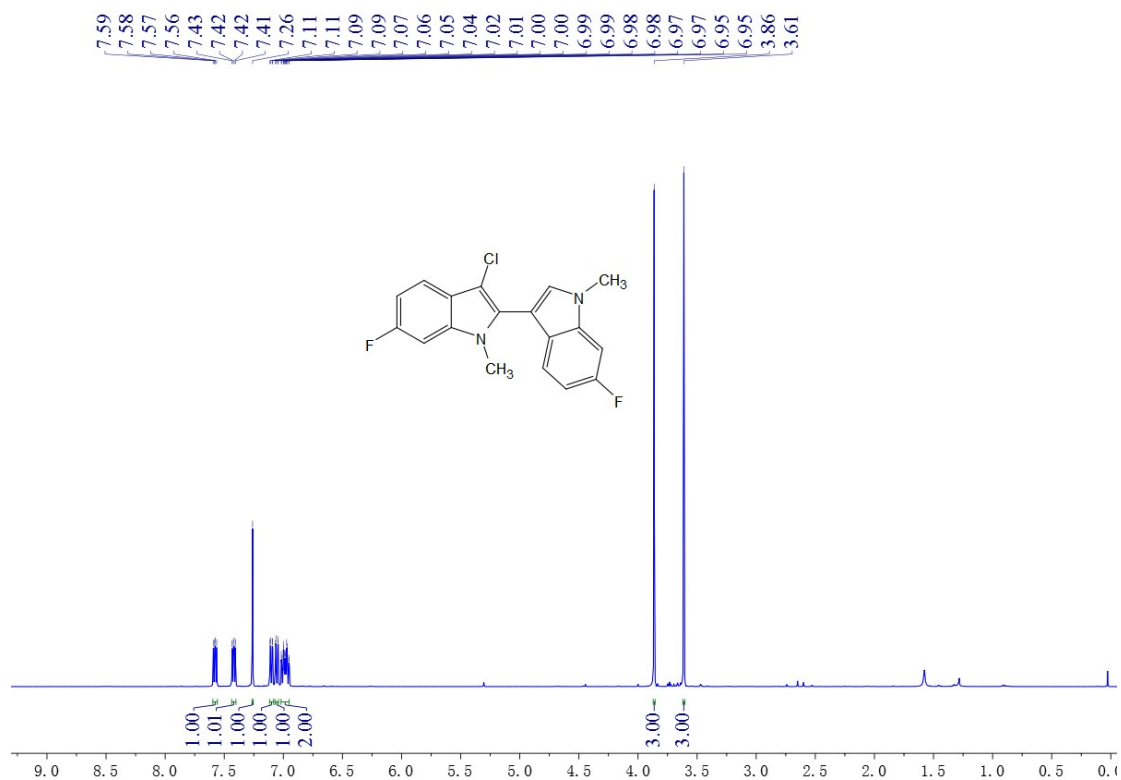

**(22)  $^{13}\text{C-NMR}$  (125 MHz,  $\text{CDCl}_3$ ) spectrum of B9**

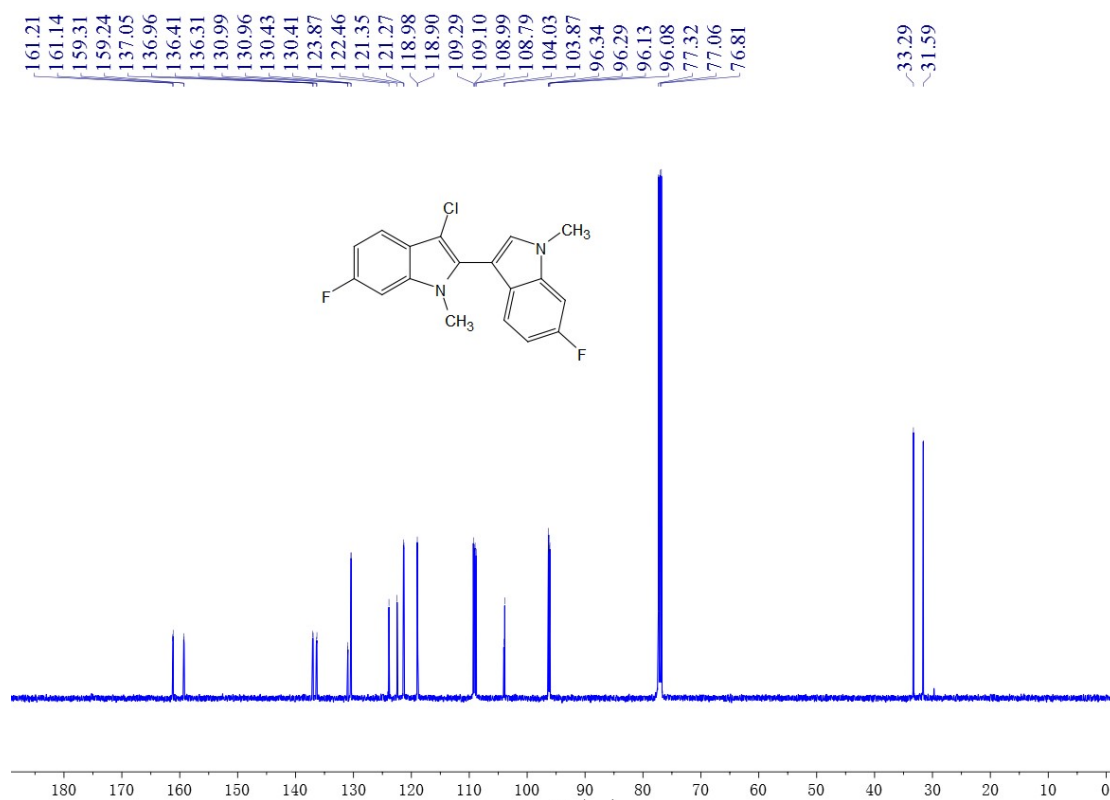

(23)  $^{19}\text{F}$ -NMR (471 MHz,  $\text{CDCl}_3$ ) spectrum of B9

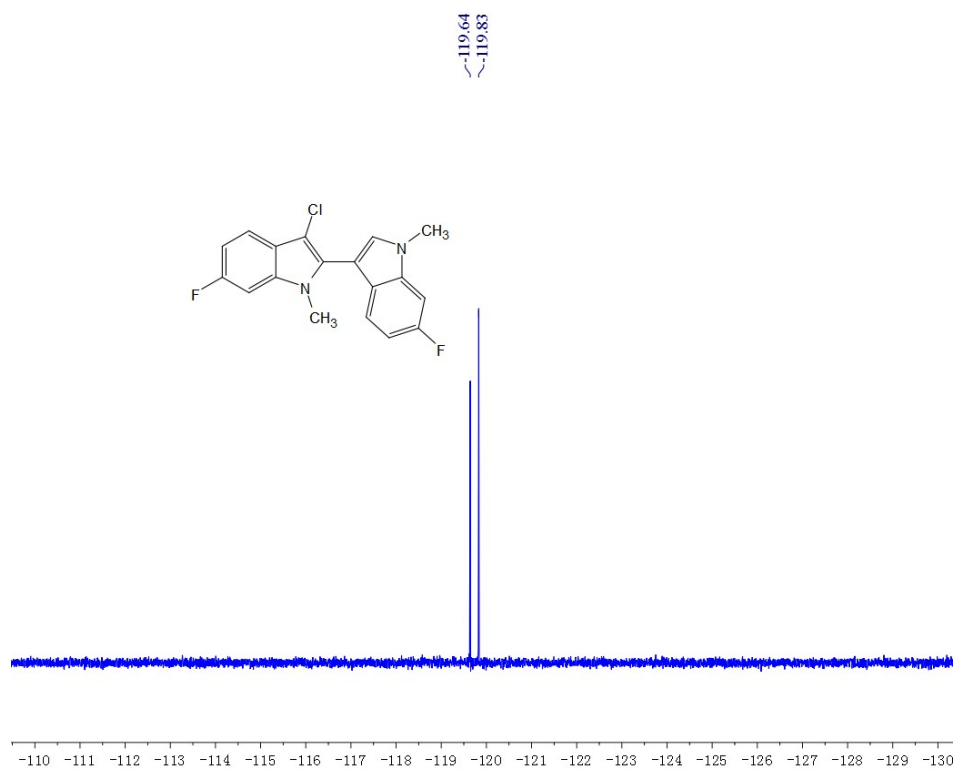

**(24)  $^1\text{H-NMR}$  (500 MHz,  $\text{CDCl}_3$ ) spectrum of B10**

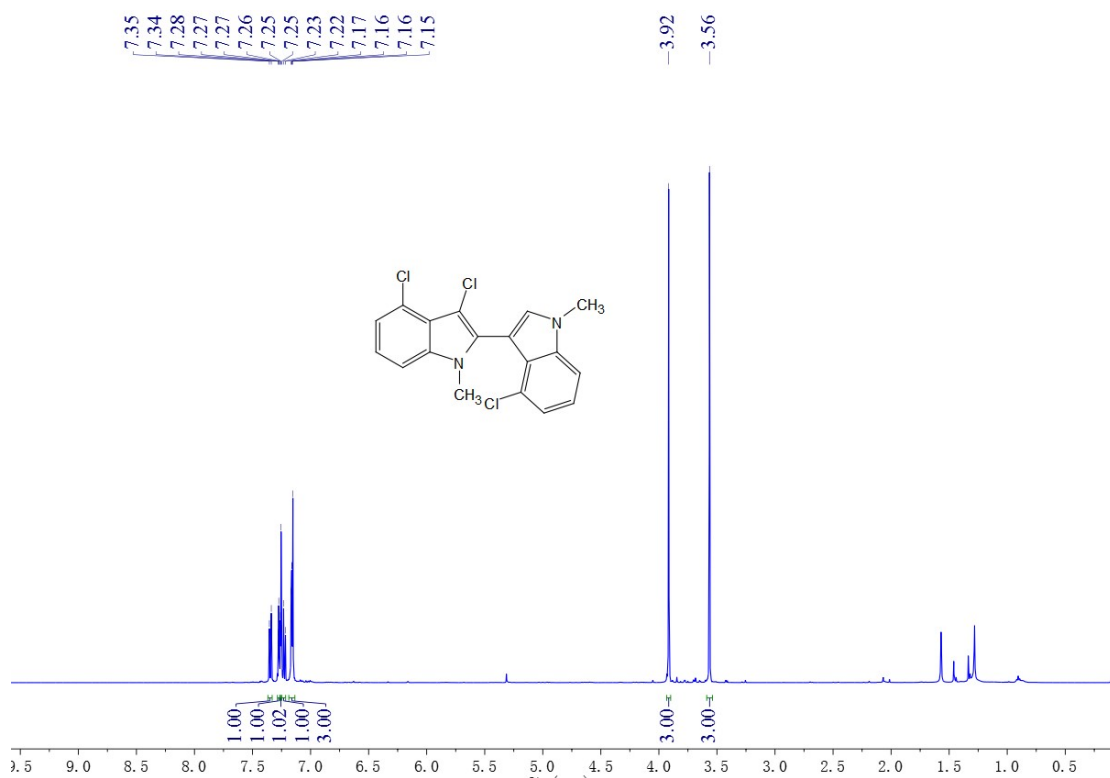

**(25)  $^{13}\text{C-NMR}$  (125 MHz,  $\text{CDCl}_3$ ) spectrum of B10**

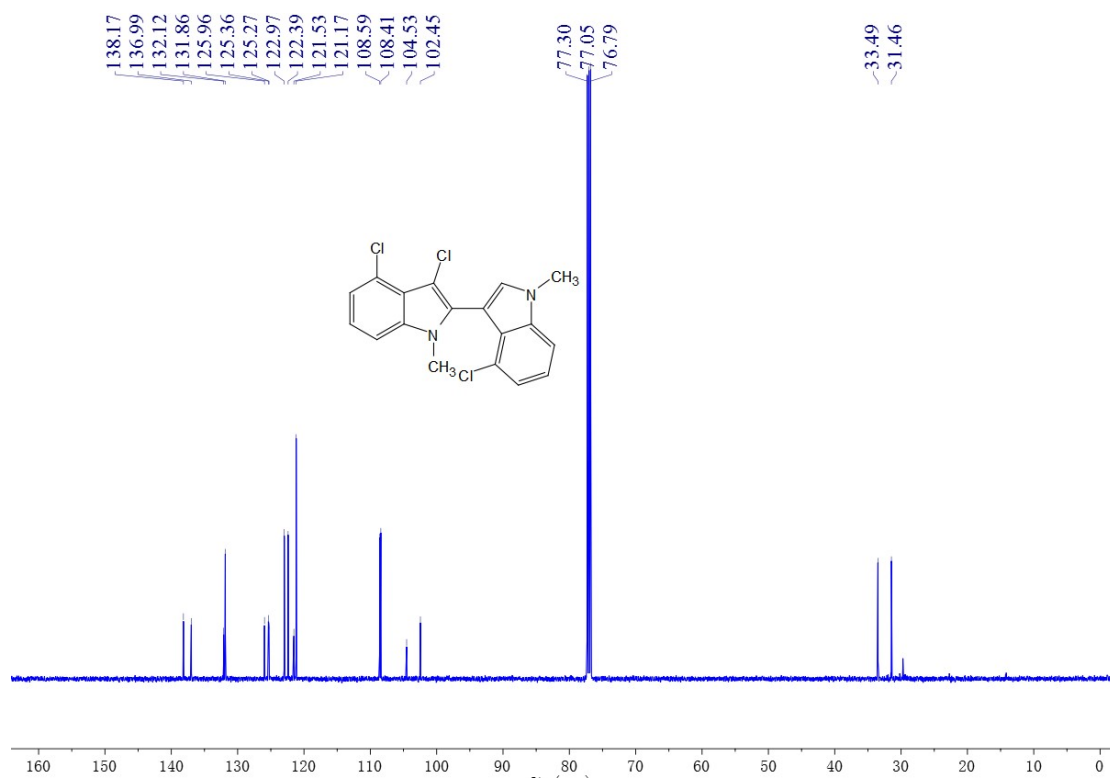

(26)  $^1\text{H-NMR}$  (500 MHz,  $\text{CDCl}_3$ ) spectrum of B11

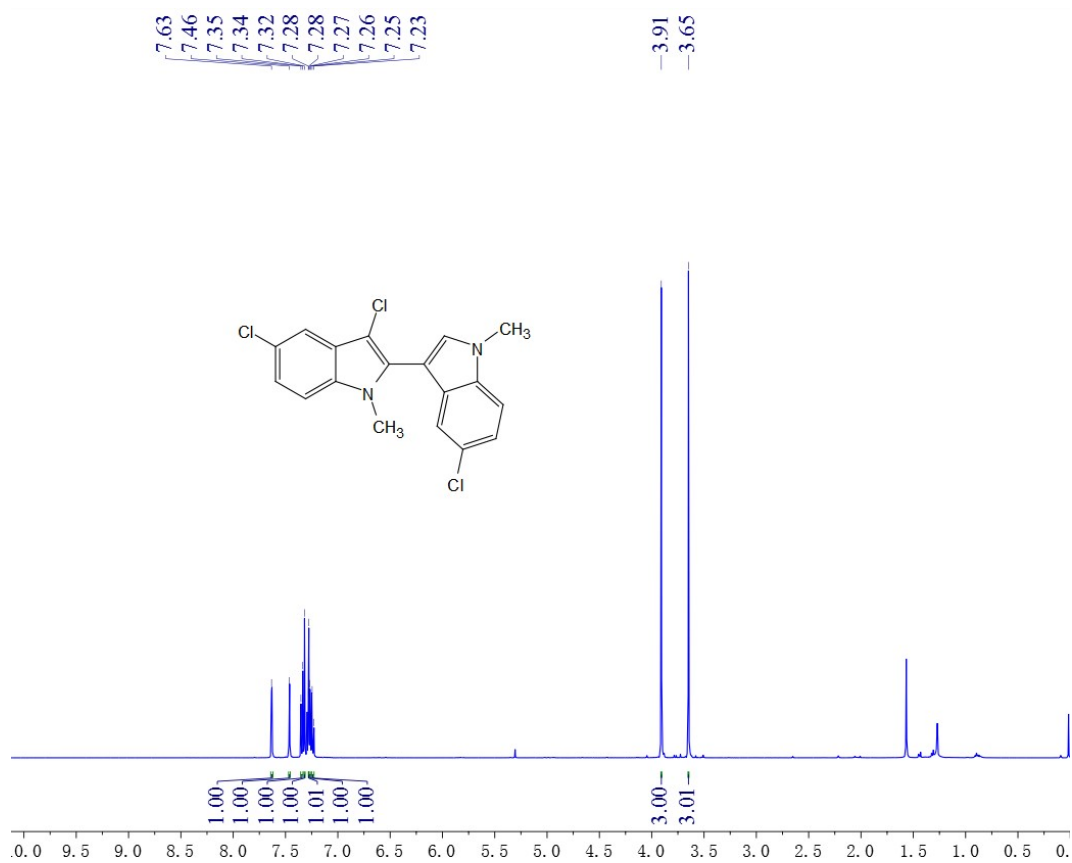

(27)  $^{13}\text{C-NMR}$  (125 MHz,  $\text{CDCl}_3$ ) spectrum of B11

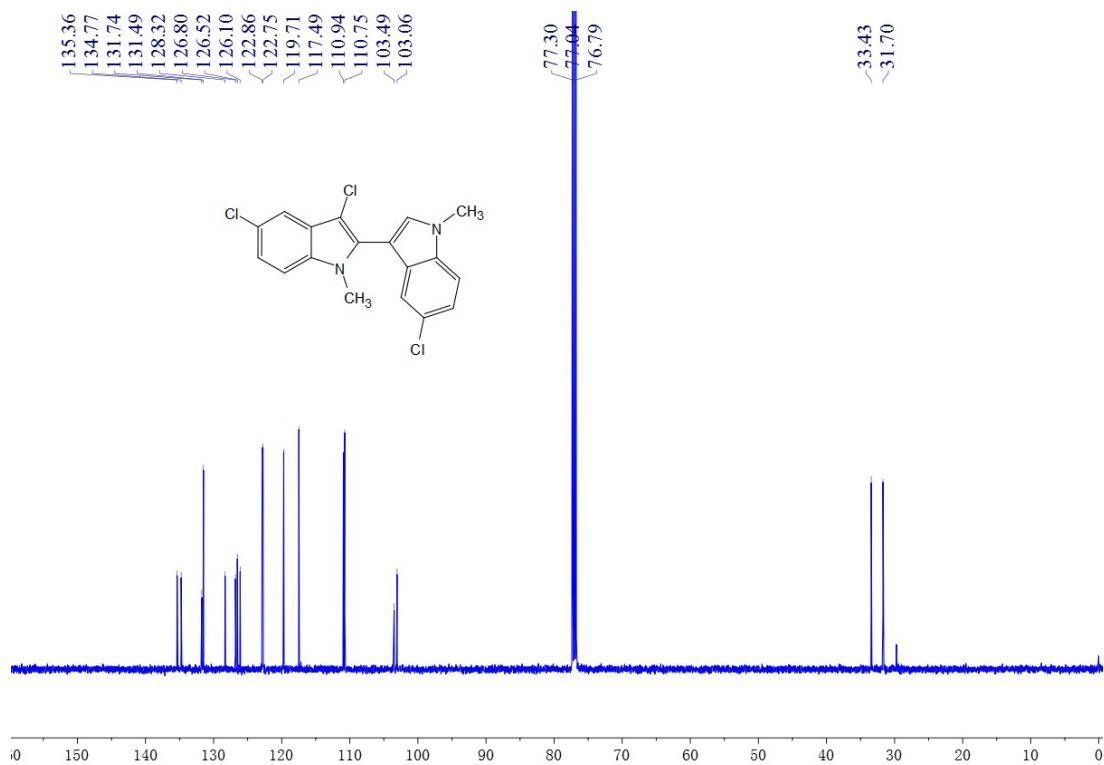

**(28)  $^1\text{H-NMR}$  (500 MHz,  $\text{CDCl}_3$ ) spectrum of B12**

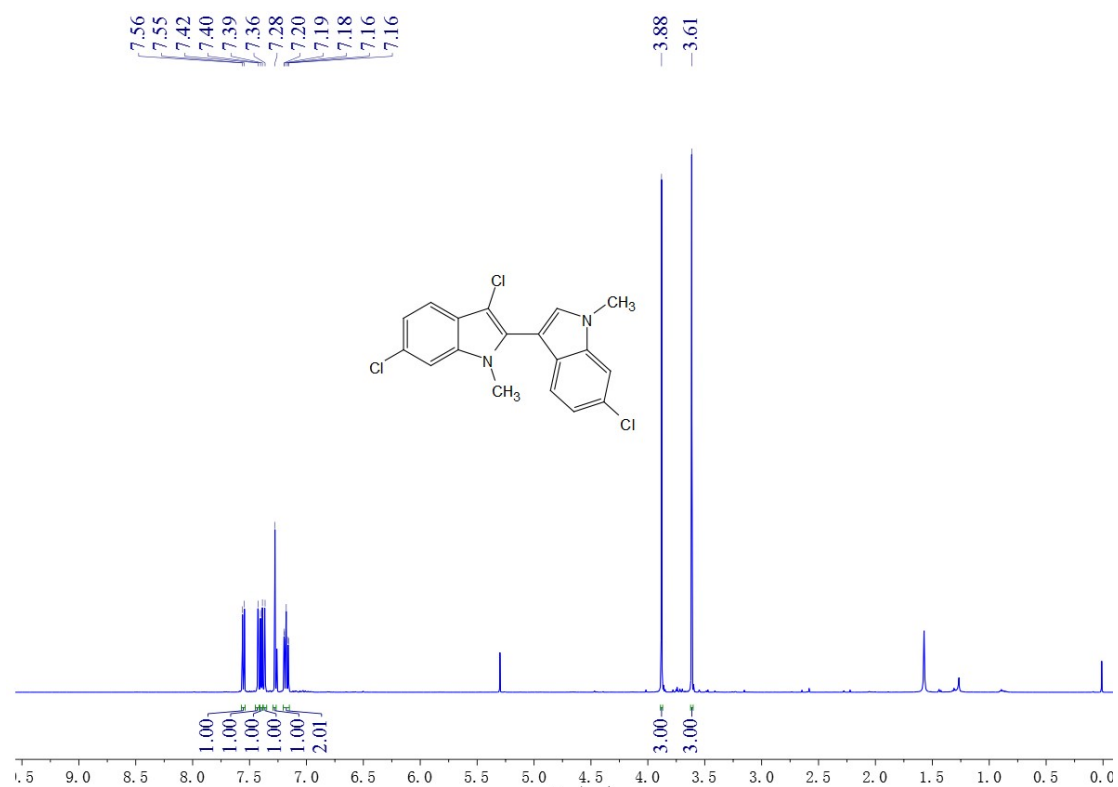

**(29)  $^{13}\text{C-NMR}$  (125 MHz,  $\text{CDCl}_3$ ) spectrum of B12**

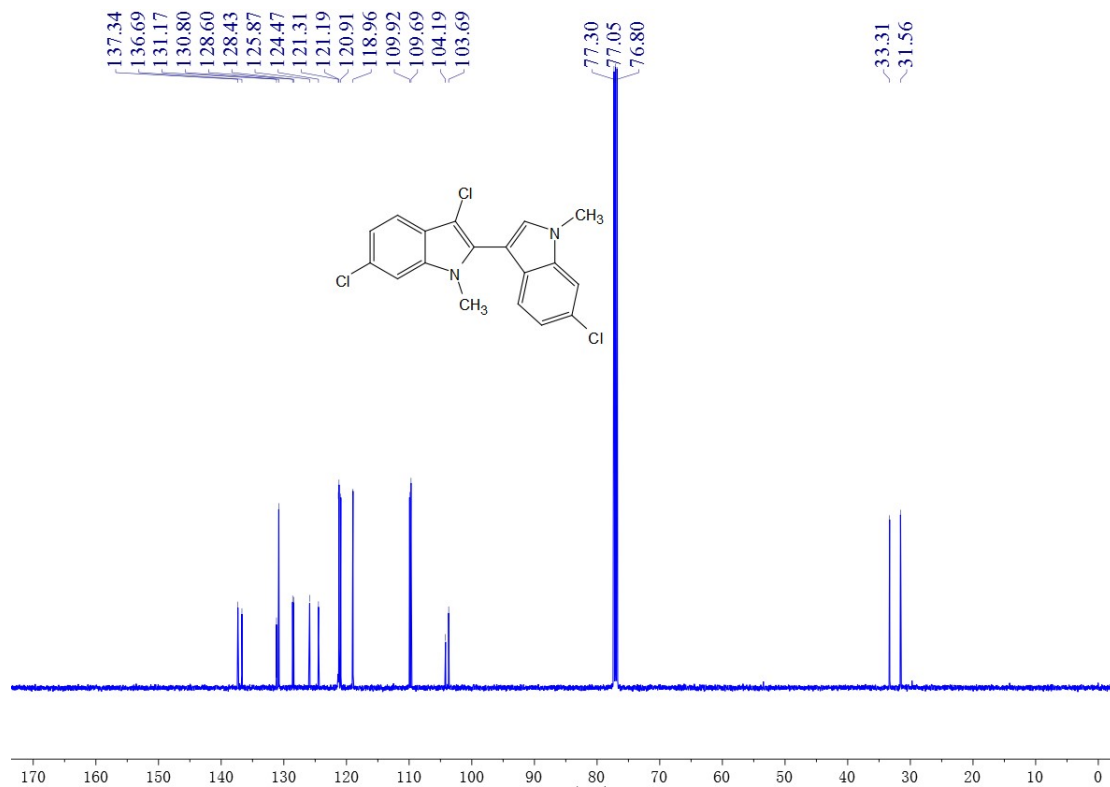

**(30)  $^1\text{H-NMR}$  (500 MHz,  $\text{CDCl}_3$ ) spectrum of B13**

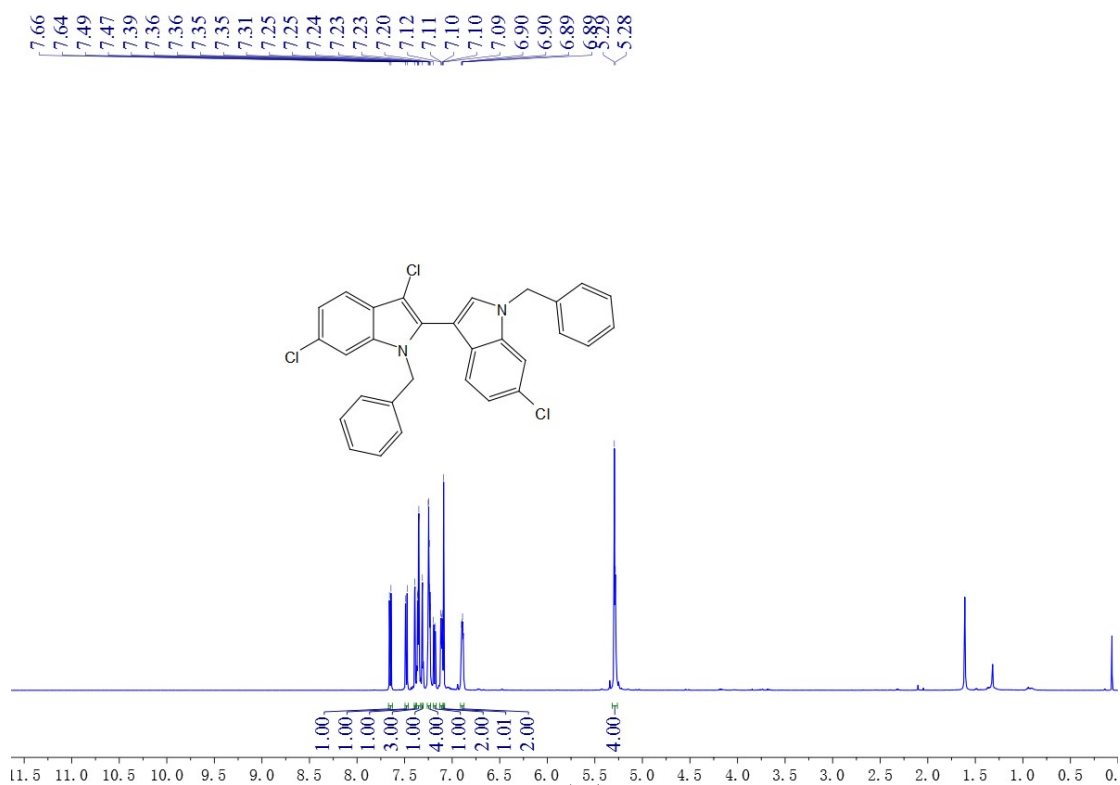

**(31)  $^{13}\text{C-NMR}$  (125 MHz,  $\text{CDCl}_3$ ) spectrum of B13**

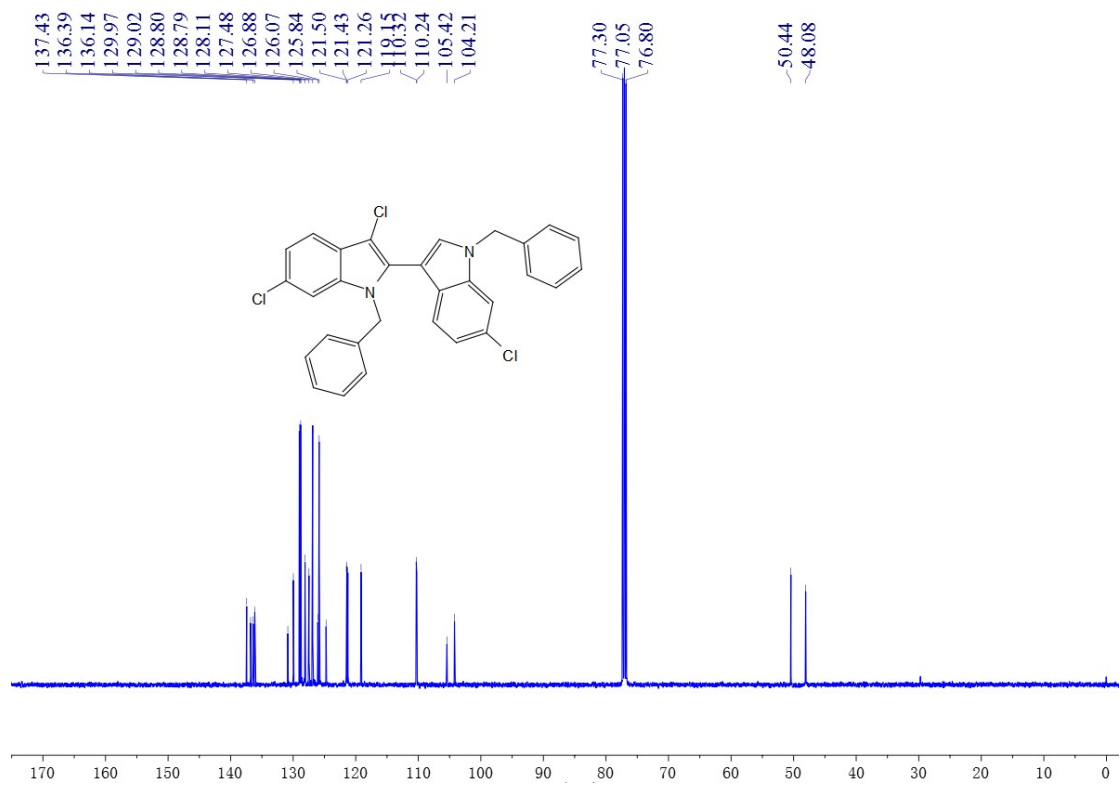

**(32)  $^1\text{H-NMR}$  (500 MHz,  $\text{CDCl}_3$ ) spectrum of B14**

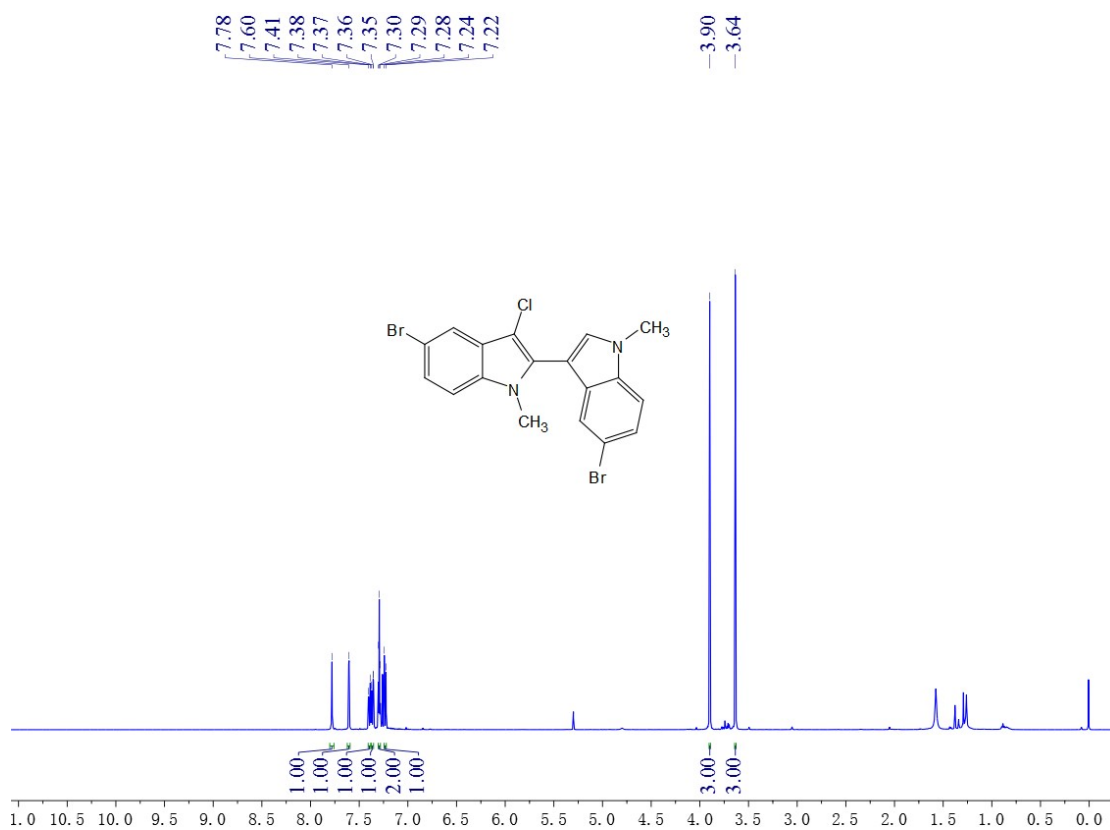

**(33)  $^{13}\text{C-NMR}$  (125 MHz,  $\text{CDCl}_3$ ) spectrum of B14**

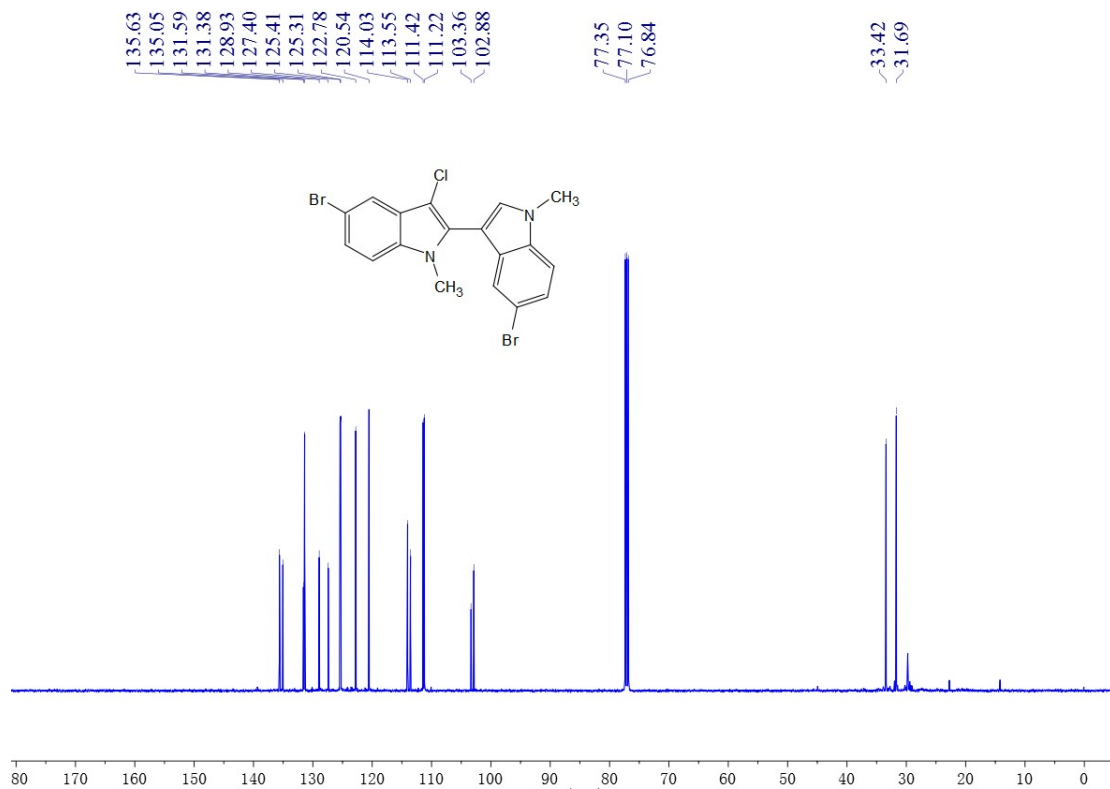

**(34)  $^1\text{H-NMR}$  (500 MHz,  $\text{CDCl}_3$ ) spectrum of B15**

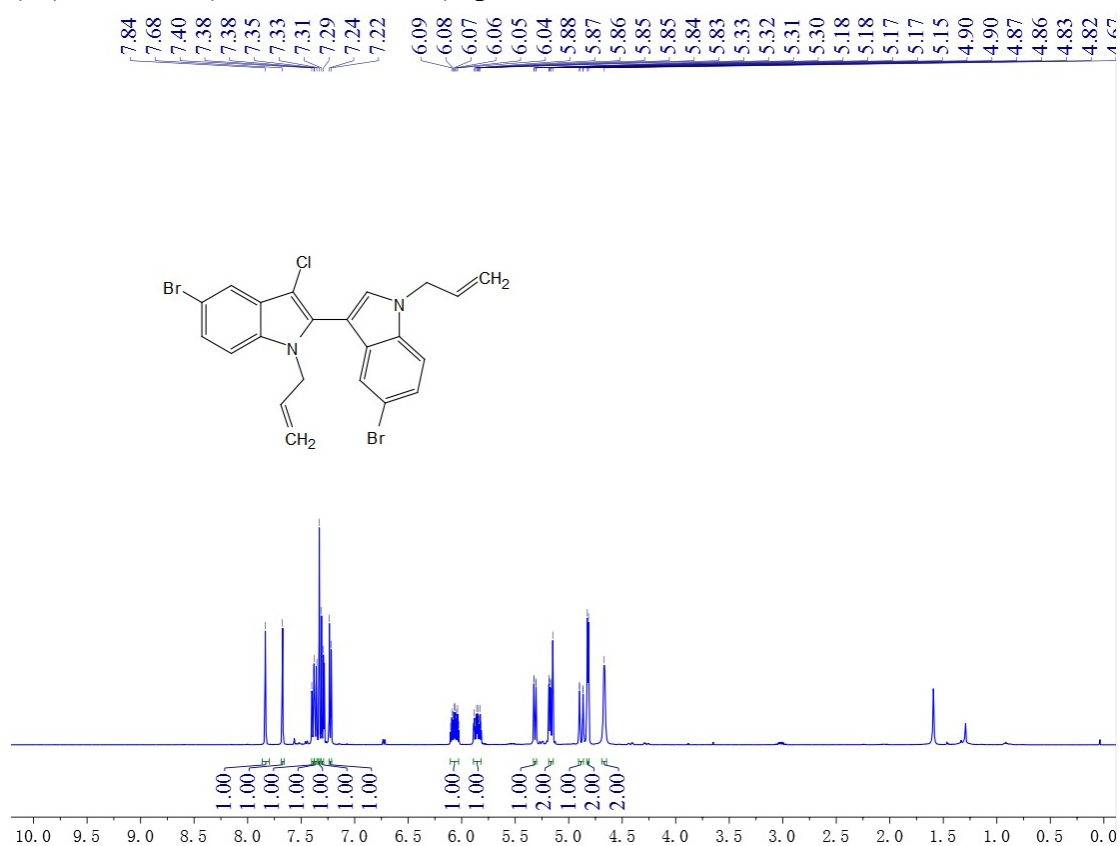

**(35)  $^{13}\text{C-NMR}$  (125 MHz,  $\text{CDCl}_3$ ) spectrum of B15**

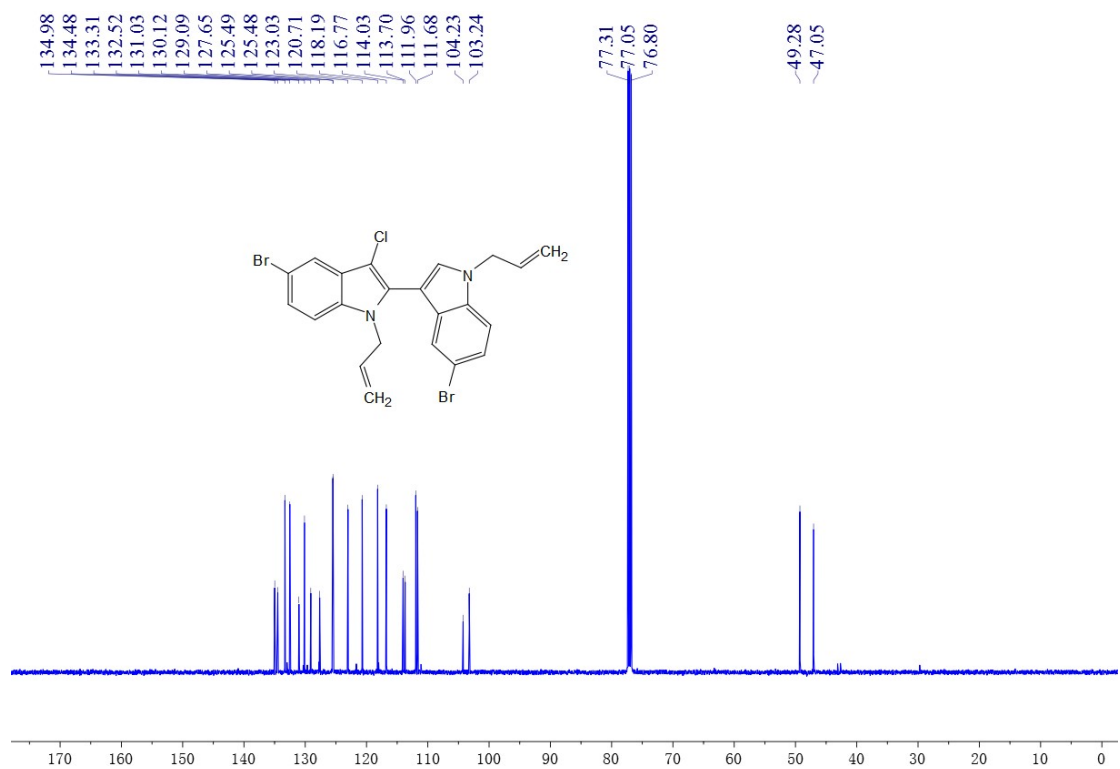

**(36)  $^1\text{H-NMR}$  (500 MHz,  $\text{CDCl}_3$ ) spectrum of B16**



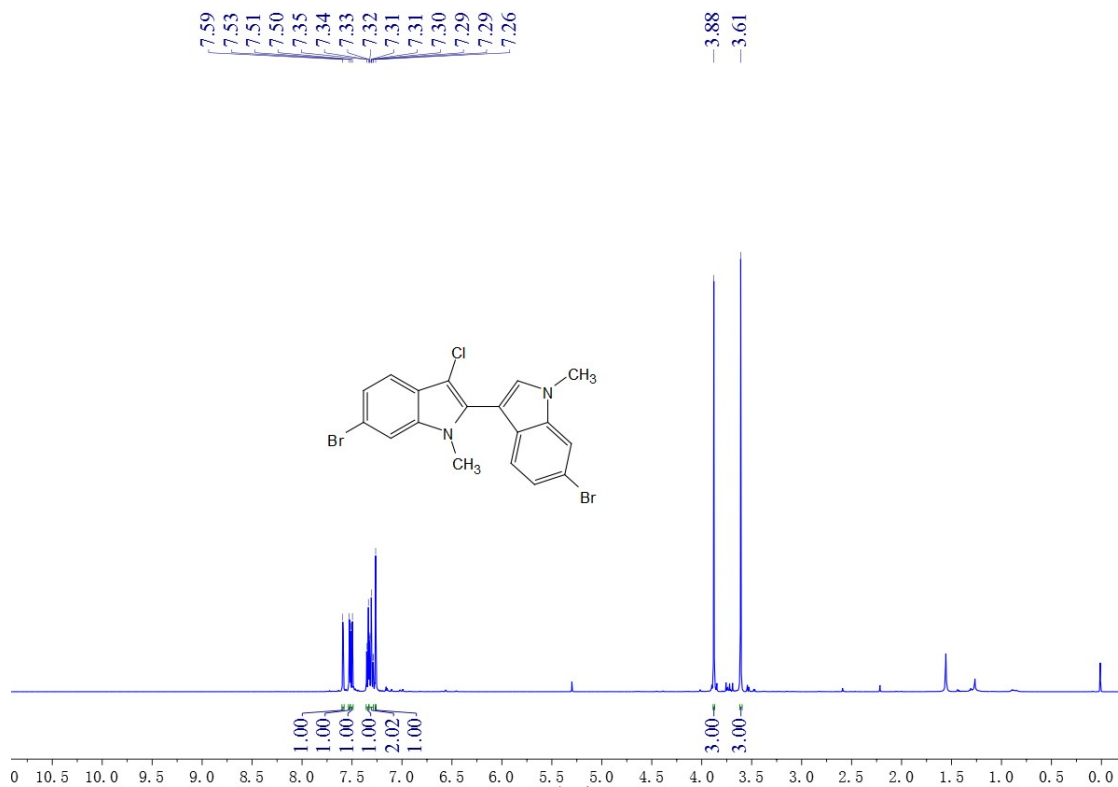

(37)  $^{13}\text{C-NMR}$  (125 MHz,  $\text{CDCl}_3$ ) spectrum of B16

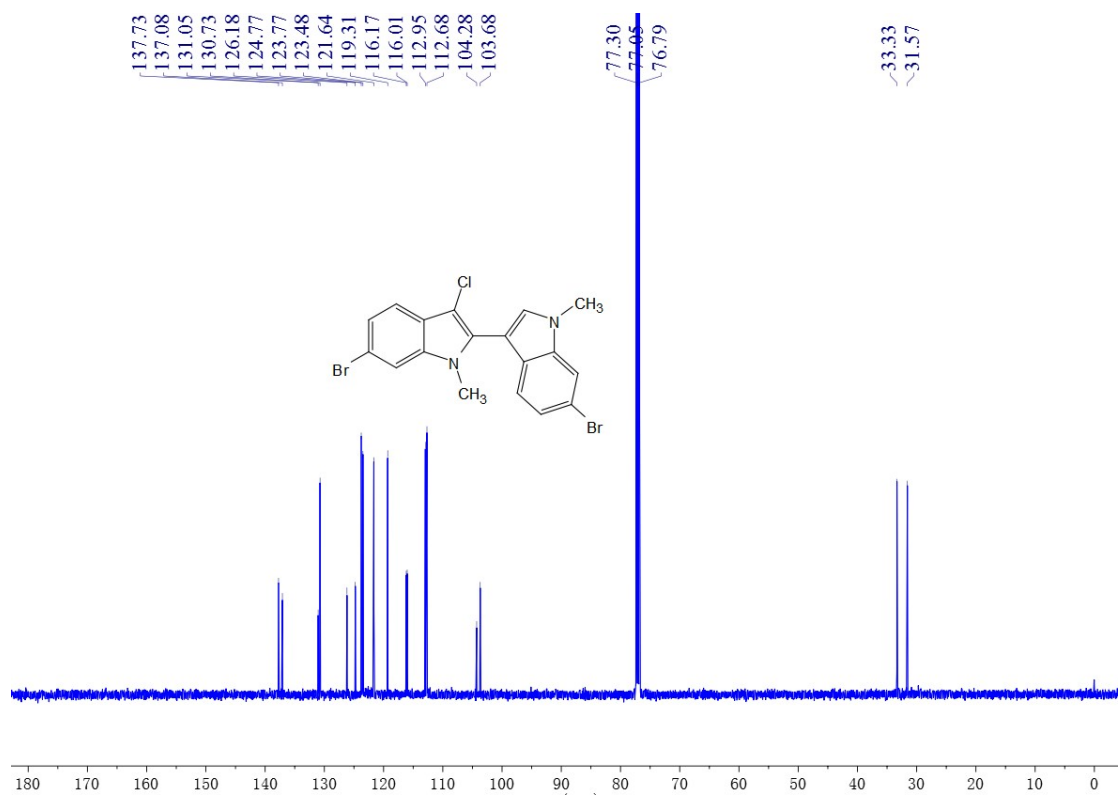

(38)  $^1\text{H-NMR}$  (500 MHz,  $\text{CDCl}_3$ ) spectrum of B17

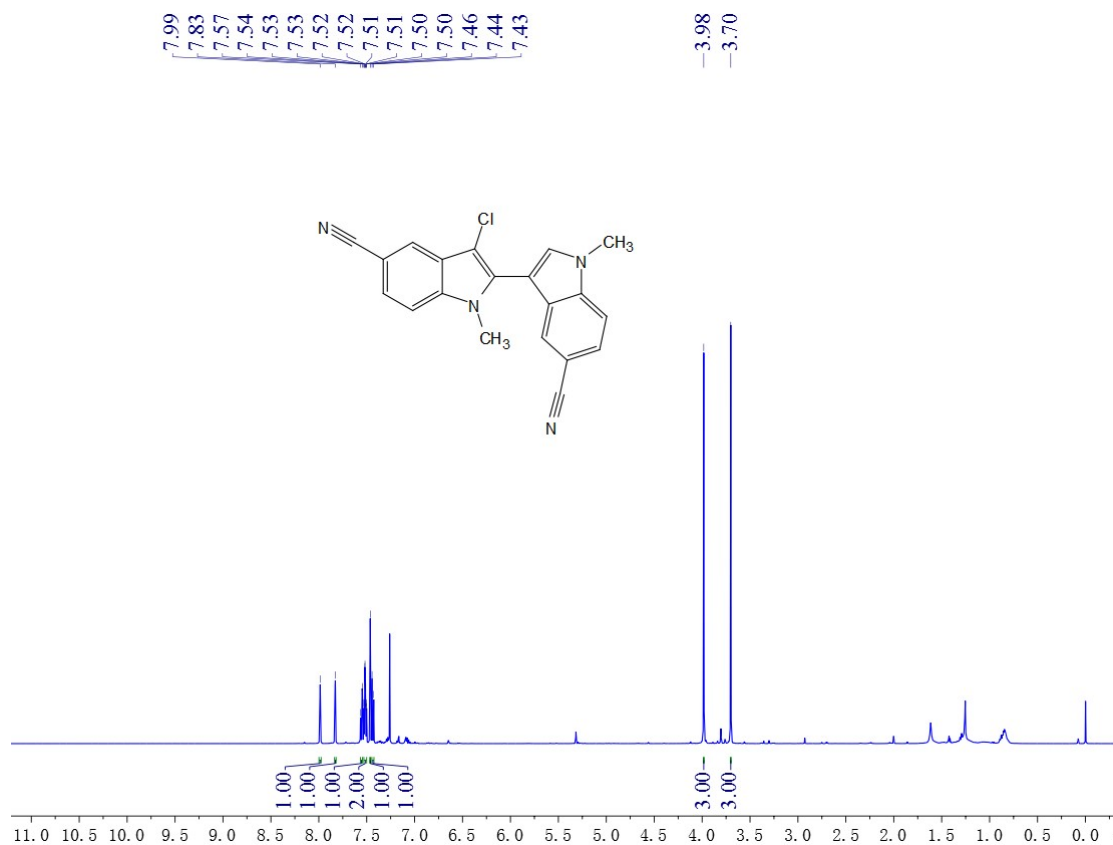

**(39)  $^{13}\text{C-NMR}$  (125 MHz,  $\text{CDCl}_3$ ) spectrum of B17**

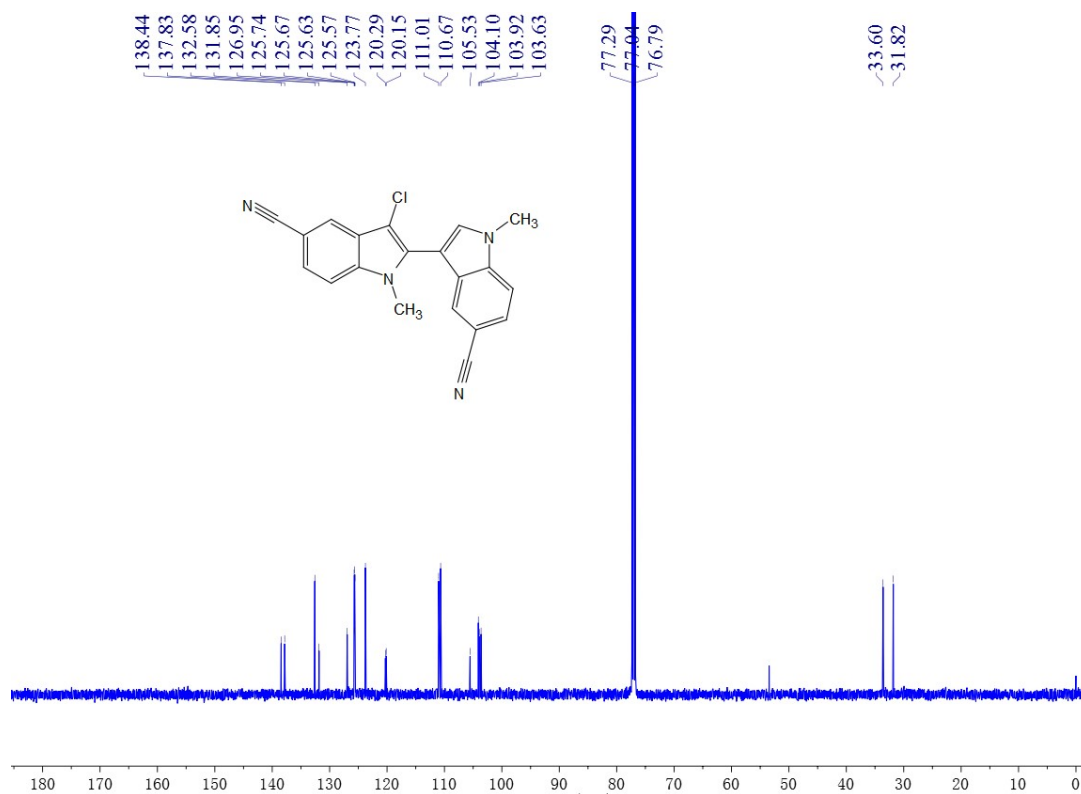

**(40)  $^1\text{H-NMR}$  (500 MHz,  $\text{CDCl}_3$ ) spectrum of B18**

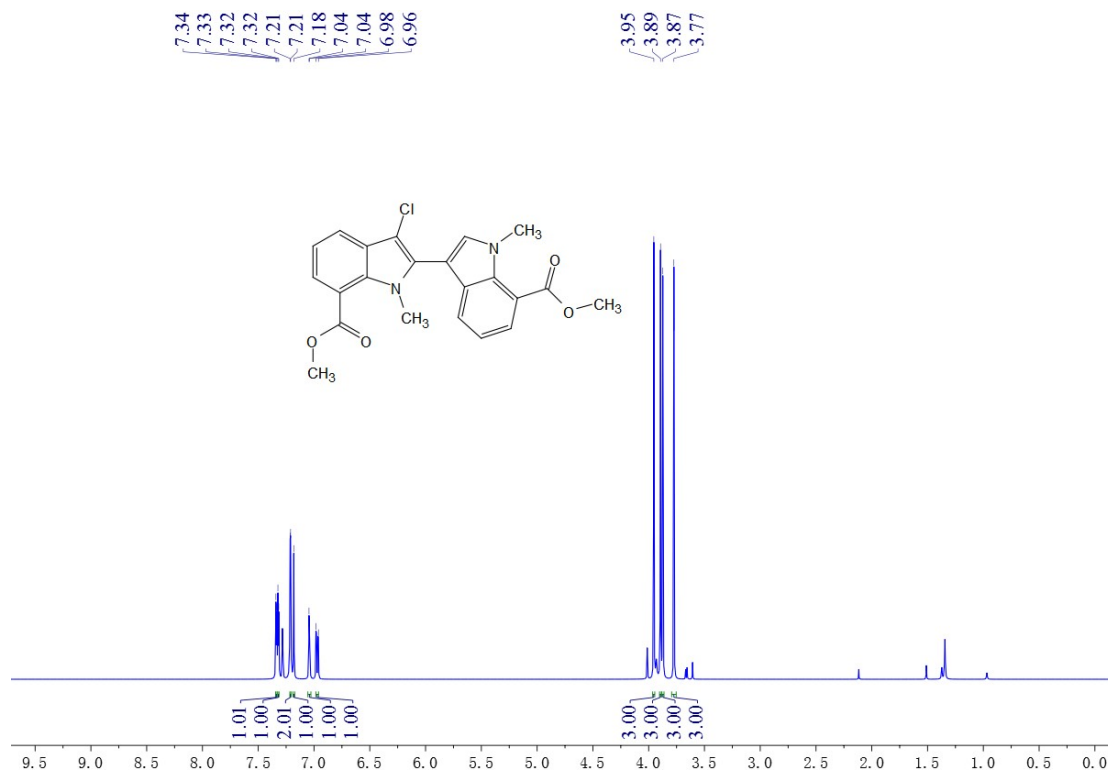

(41)  $^{13}\text{C}$ -NMR (125 MHz,  $\text{CDCl}_3$ ) spectrum of B18

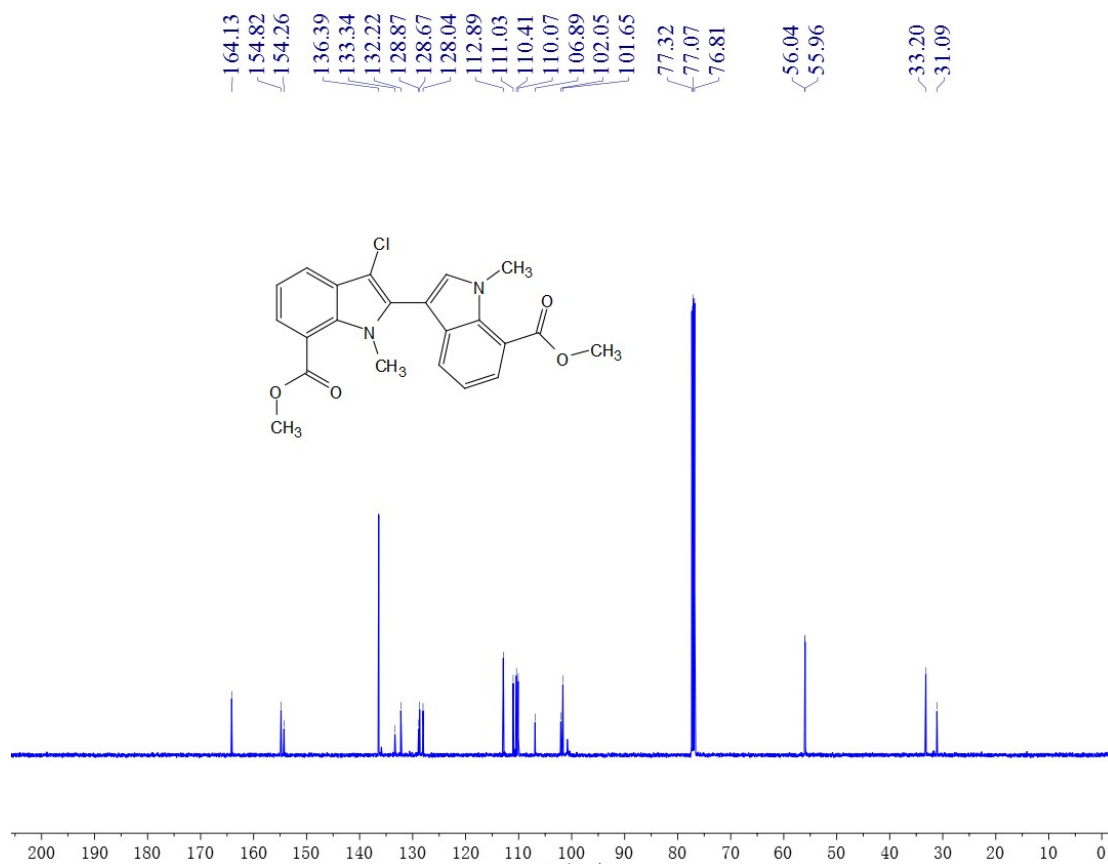

(42)  $^1\text{H}$ -NMR (500 MHz,  $\text{CDCl}_3$ ) spectrum of B19

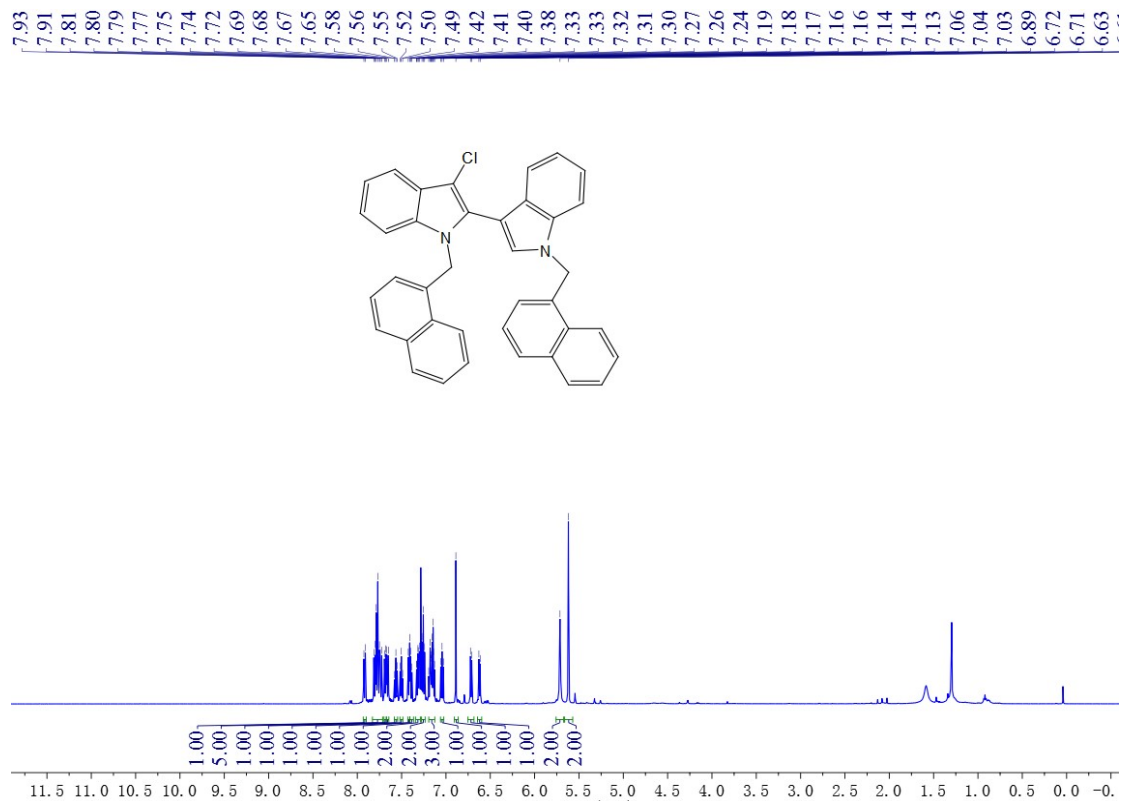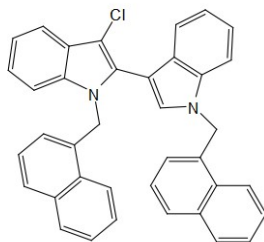

(43)  $^{13}\text{C}$ -NMR (125 MHz,  $\text{CDCl}_3$ ) spectrum of B19

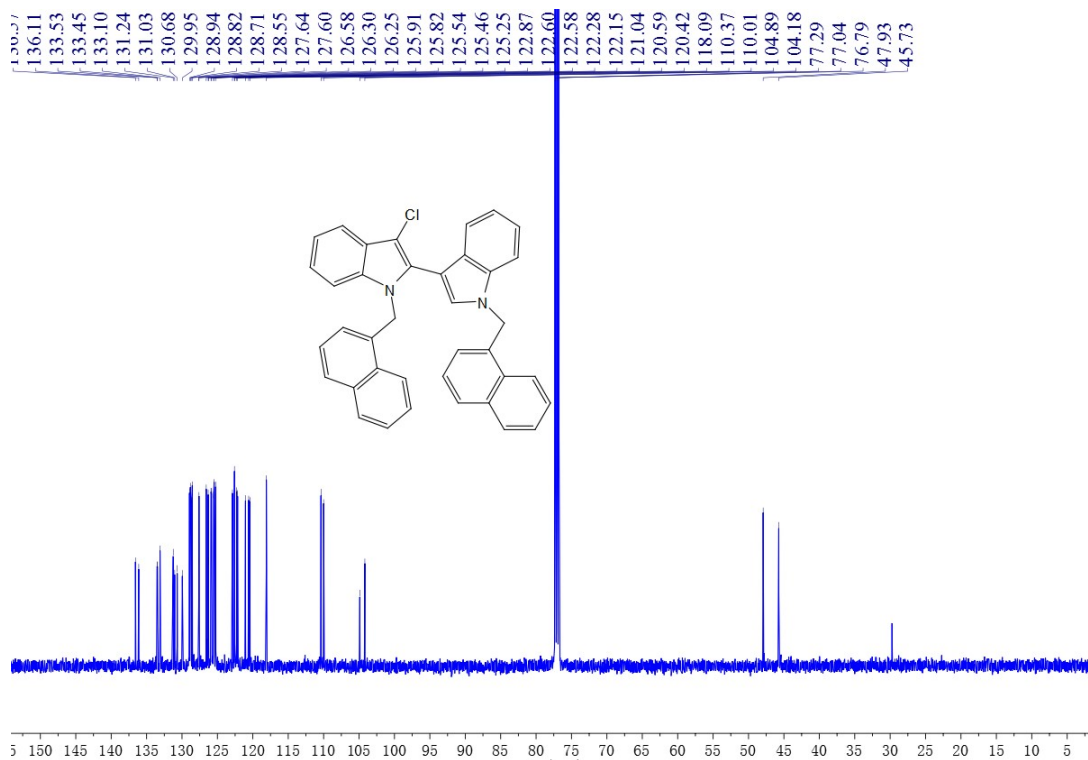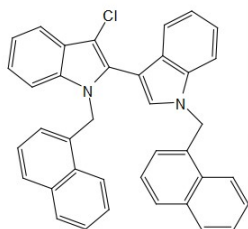

(44)  $^1\text{H}$ -NMR (500 MHz,  $\text{CDCl}_3$ ) spectrum of B20

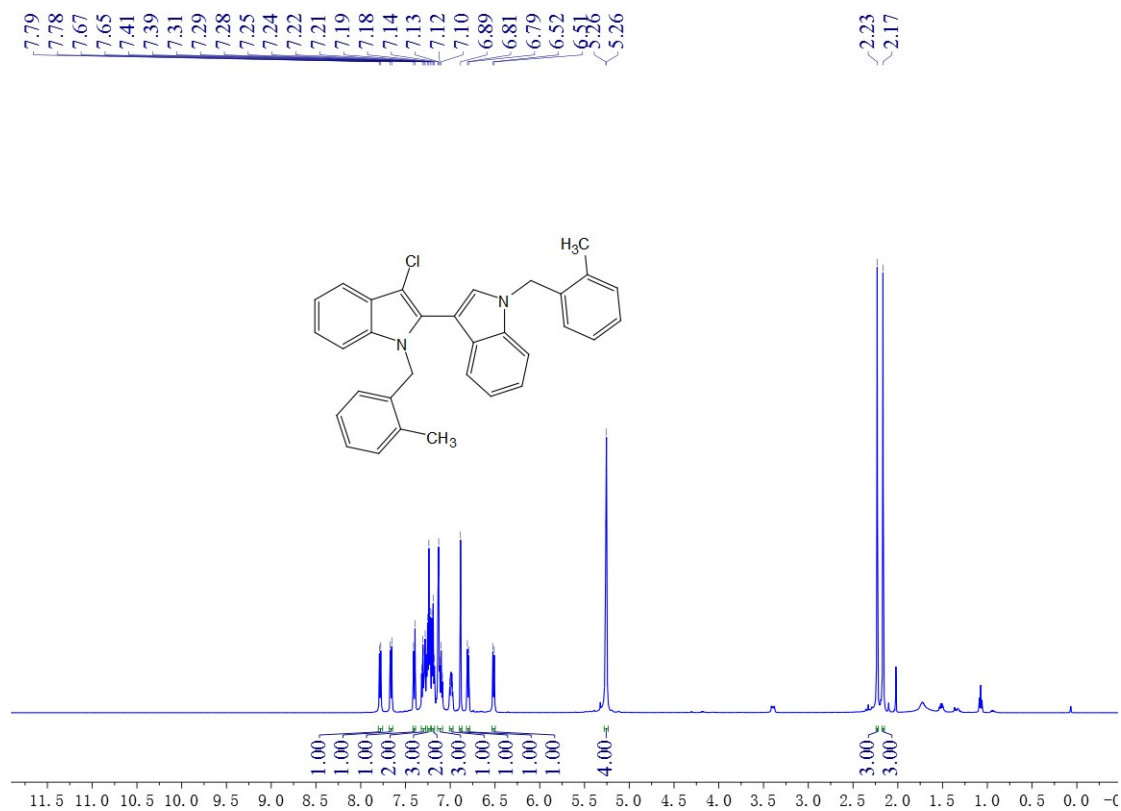

(45) <sup>13</sup>C-NMR (125 MHz, CDCl<sub>3</sub>) spectrum of B20

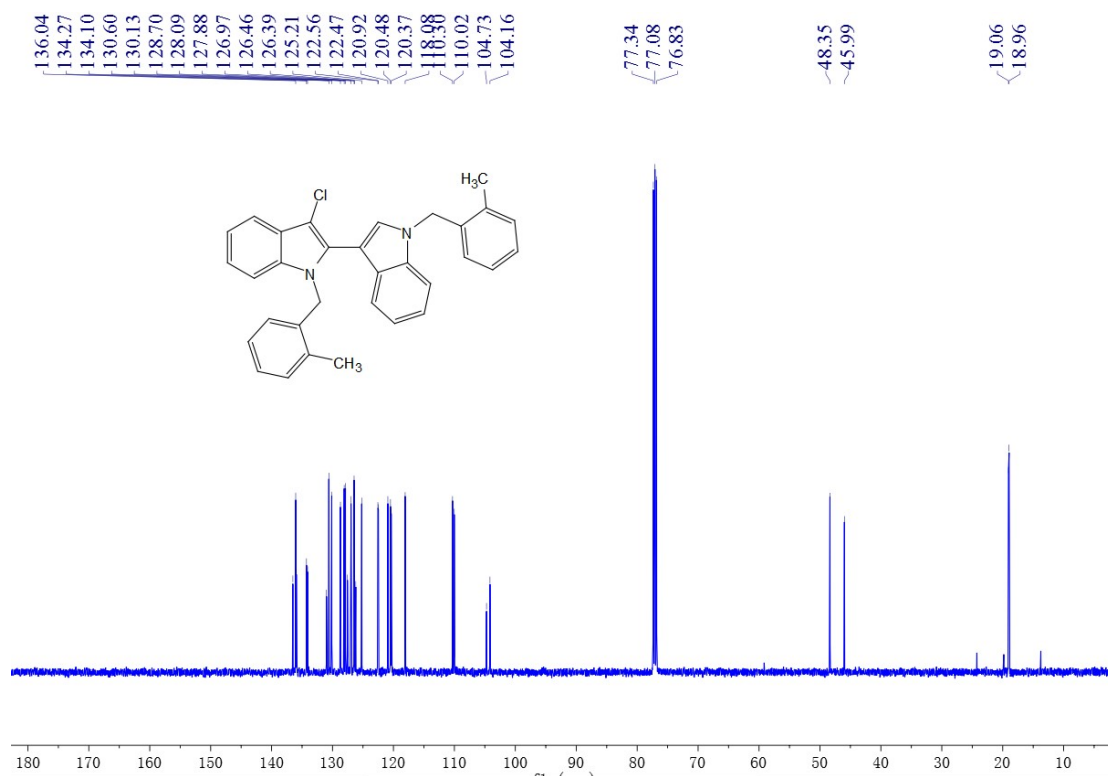

(46) <sup>1</sup>H-NMR (500 MHz, CDCl<sub>3</sub>) spectrum of B21

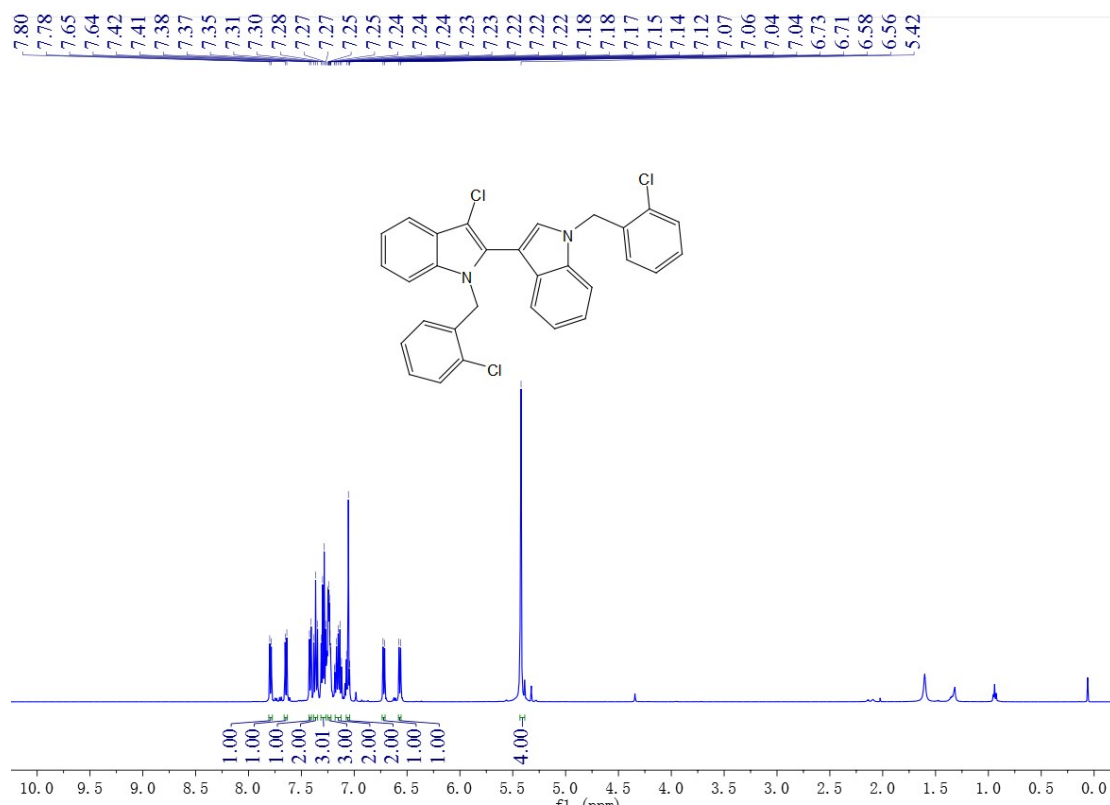

(47)  $^{13}\text{C}$ -NMR (125 MHz,  $\text{CDCl}_3$ ) spectrum of B21

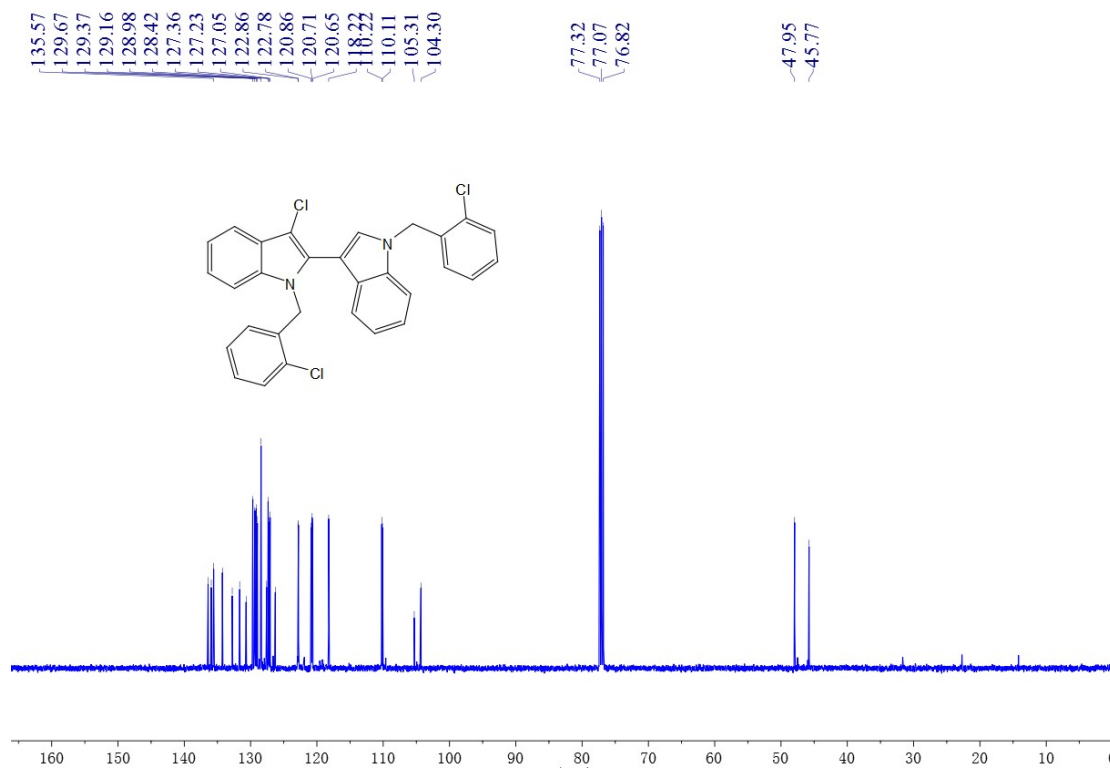

(48)  $^1\text{H}$ -NMR (500 MHz,  $\text{CDCl}_3$ ) spectrum of B22

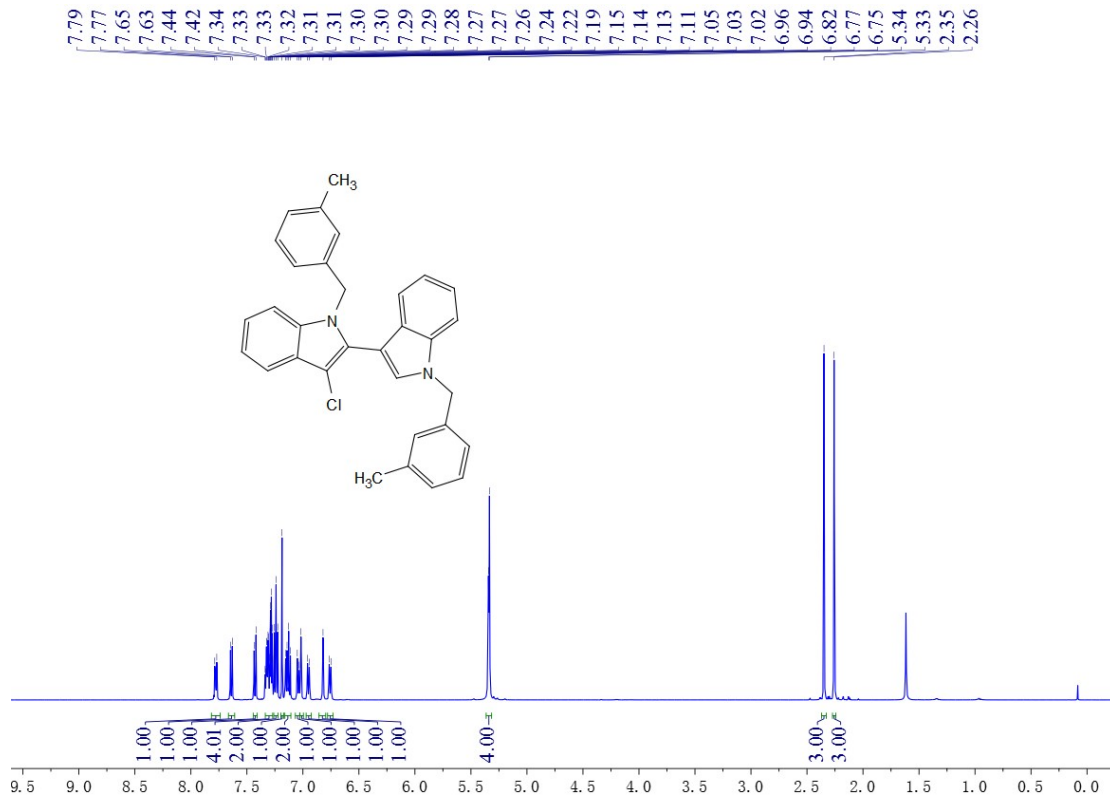

**(49)  $^{13}\text{C}$ -NMR (125 MHz,  $\text{CDCl}_3$ ) spectrum of B22**

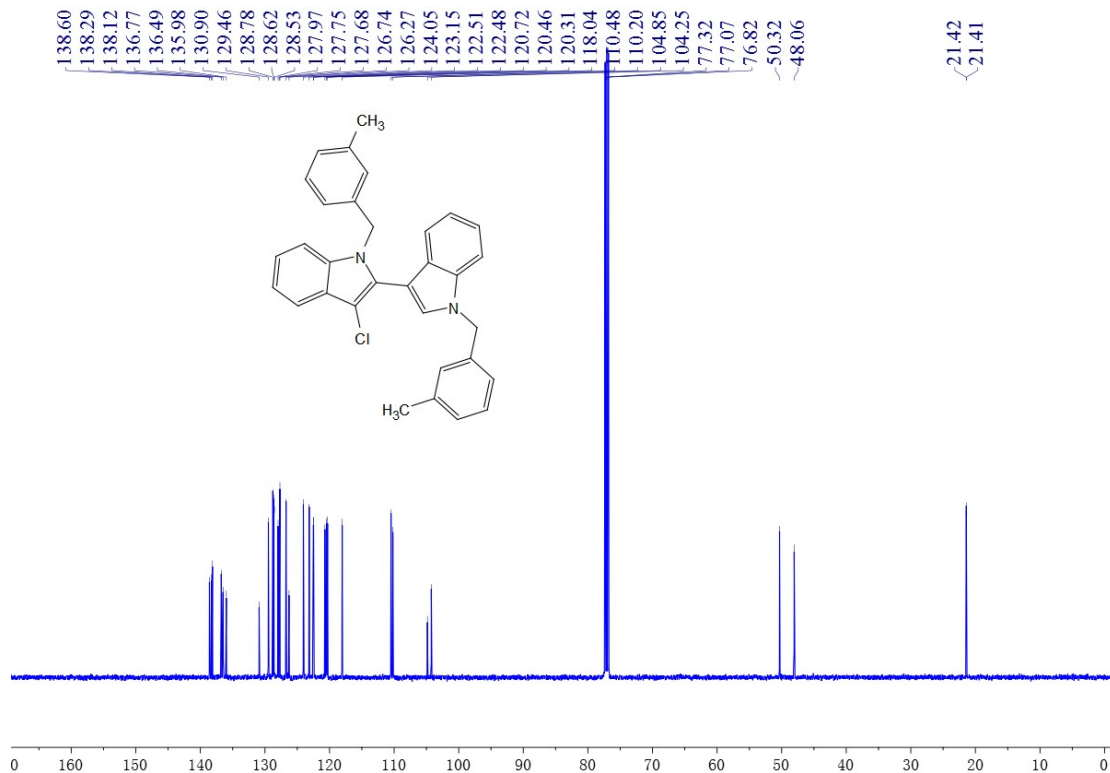

**(50)  $^1\text{H}$ -NMR (500 MHz,  $\text{CDCl}_3$ ) spectrum of B23**

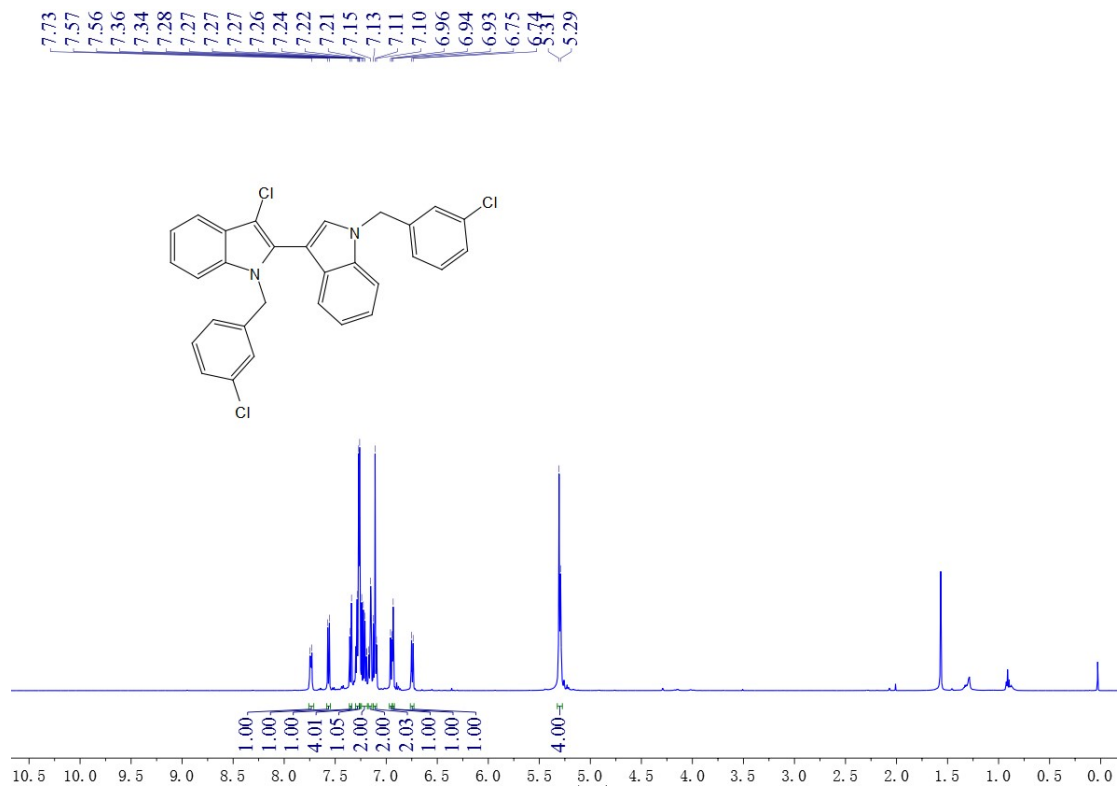

**(51)  $^{13}\text{C}$ -NMR (125 MHz,  $\text{CDCl}_3$ ) spectrum of B23**

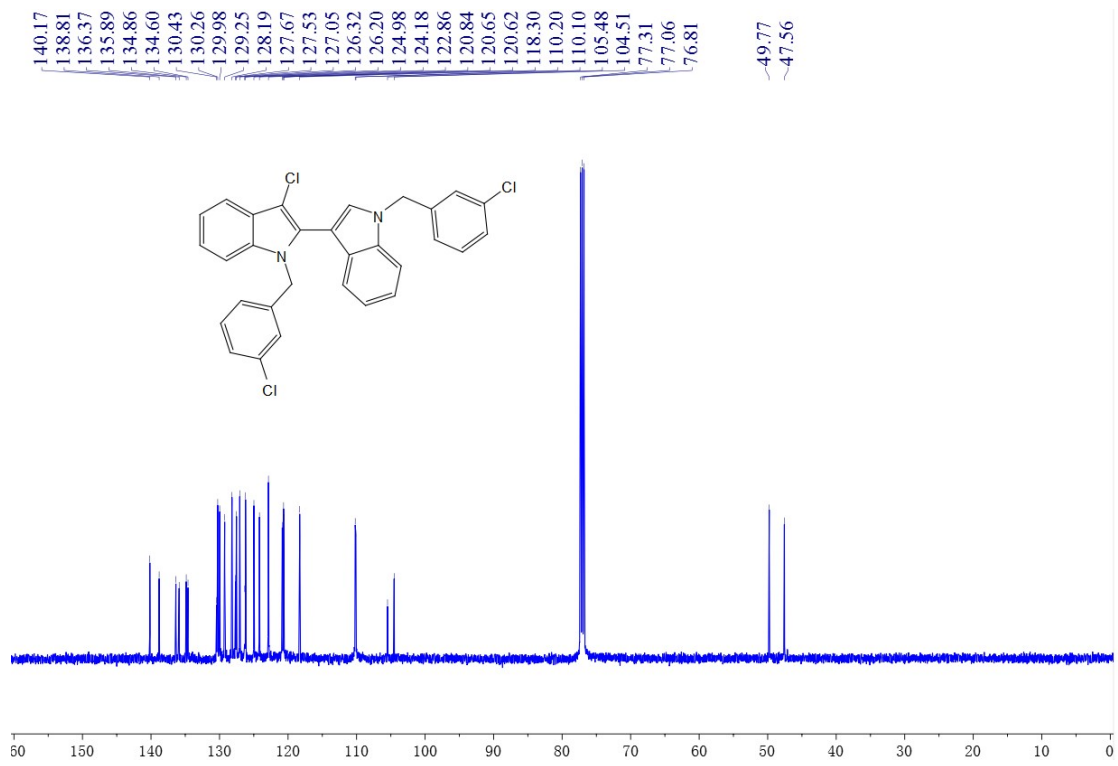

**(52)  $^1\text{H}$ -NMR (500 MHz,  $\text{CDCl}_3$ ) spectrum of B24**



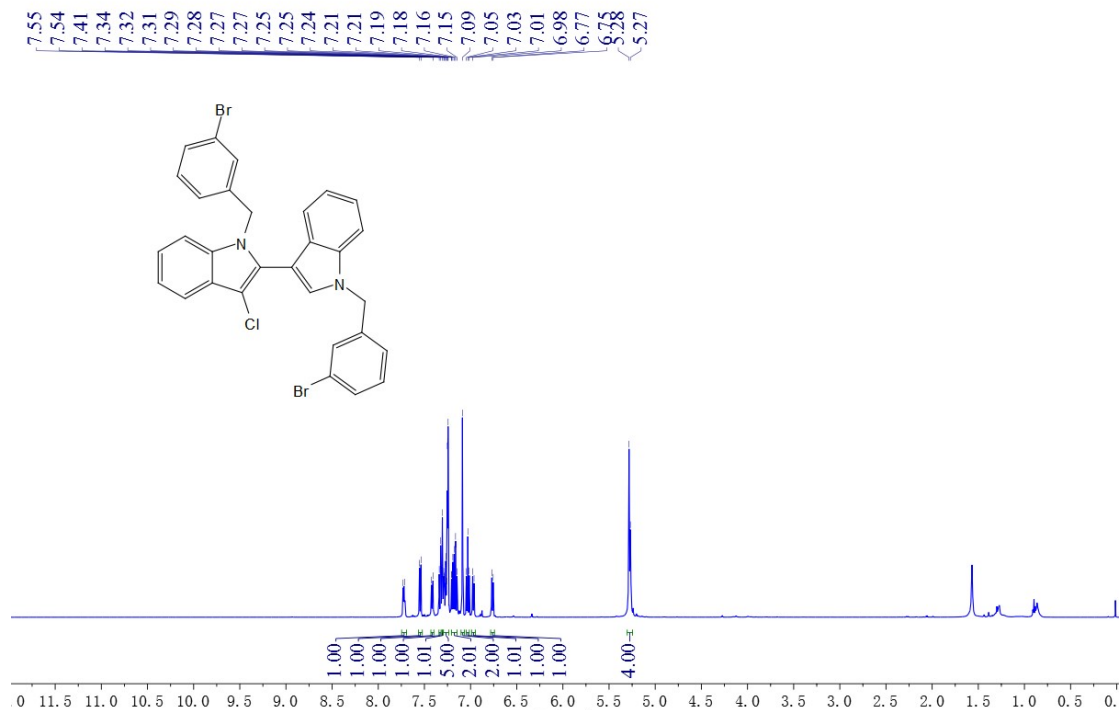

(53) <sup>13</sup>C-NMR (125 MHz, CDCl<sub>3</sub>) spectrum of B24

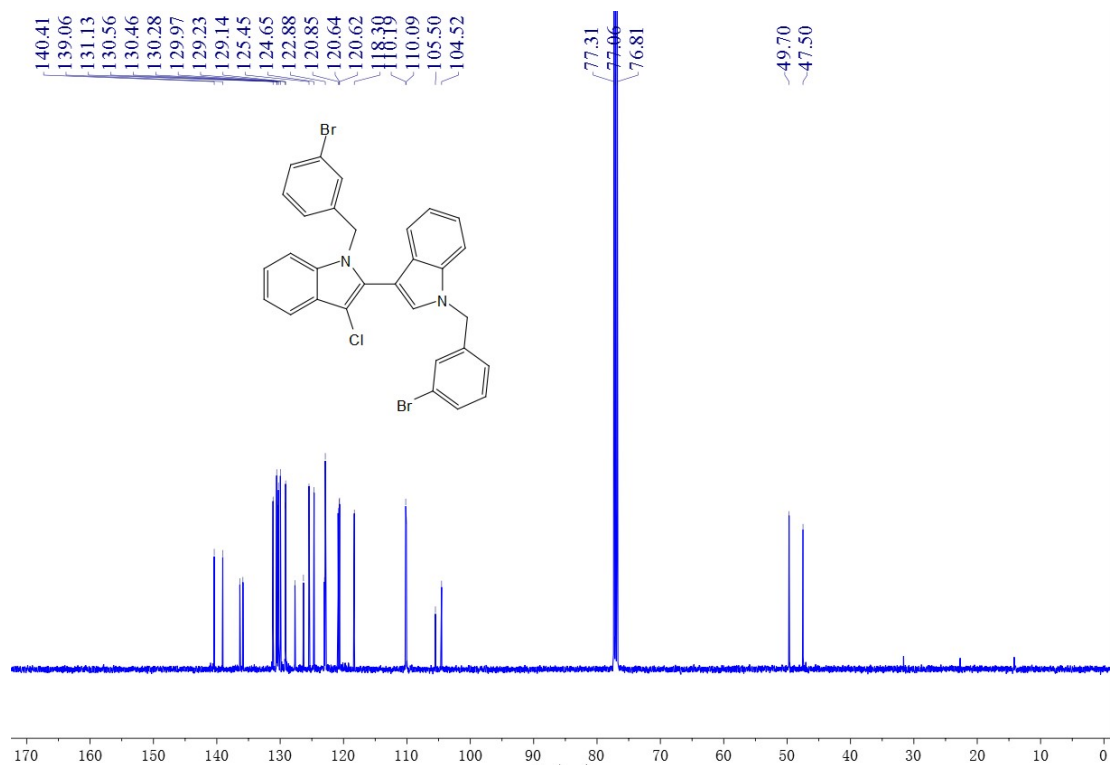

(54) <sup>1</sup>H-NMR (500 MHz, CDCl<sub>3</sub>) spectrum of B25

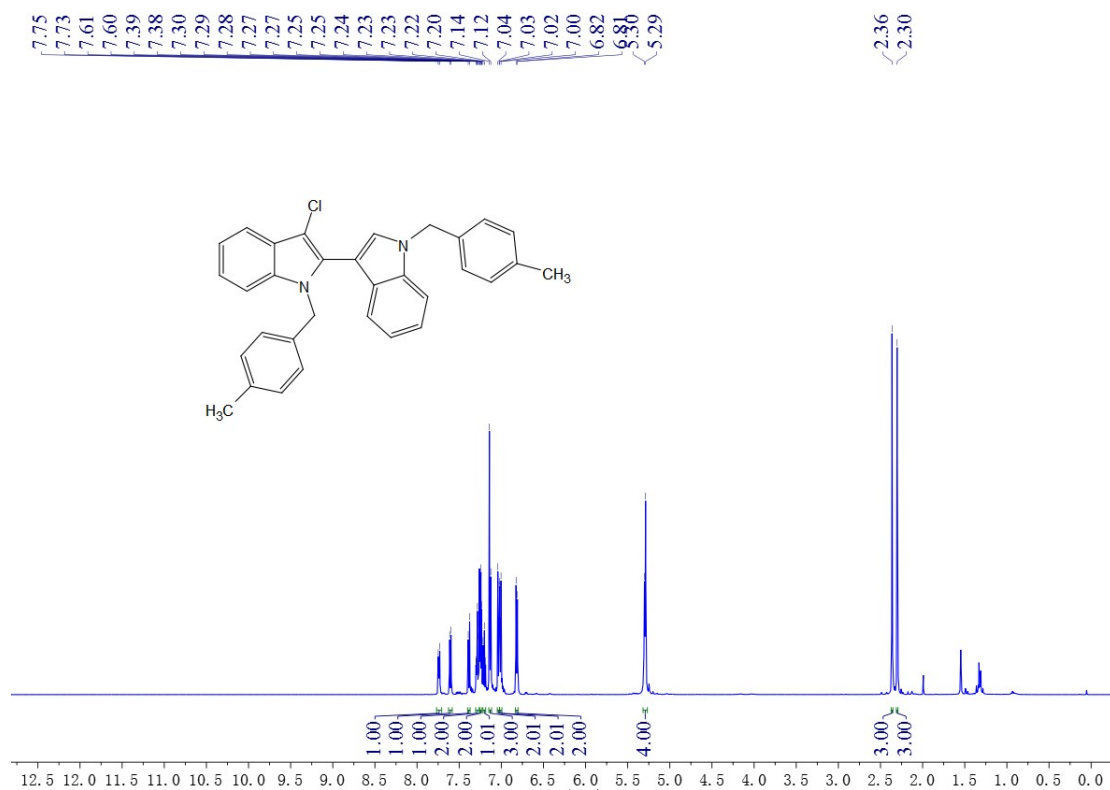

**(55) <sup>13</sup>C-NMR (125 MHz, CDCl<sub>3</sub>) spectrum of B25**

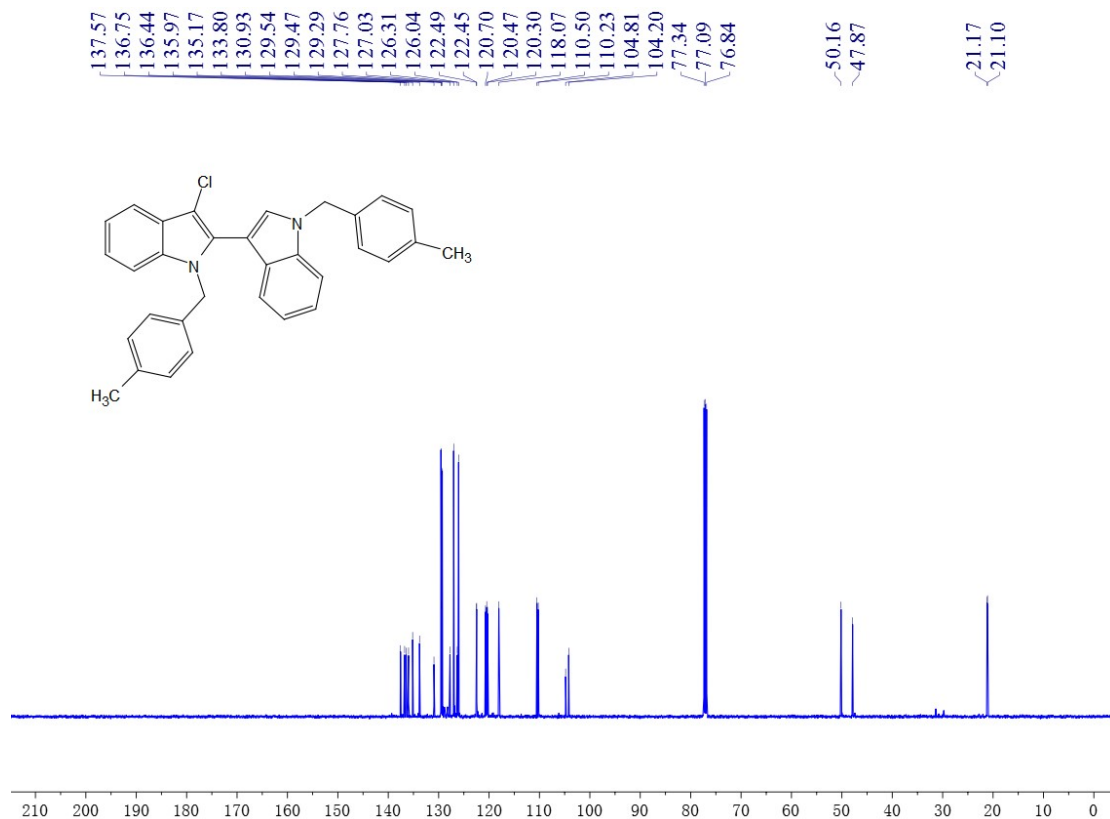

**(56) <sup>1</sup>H-NMR (500 MHz, CDCl<sub>3</sub>) spectrum of B26**

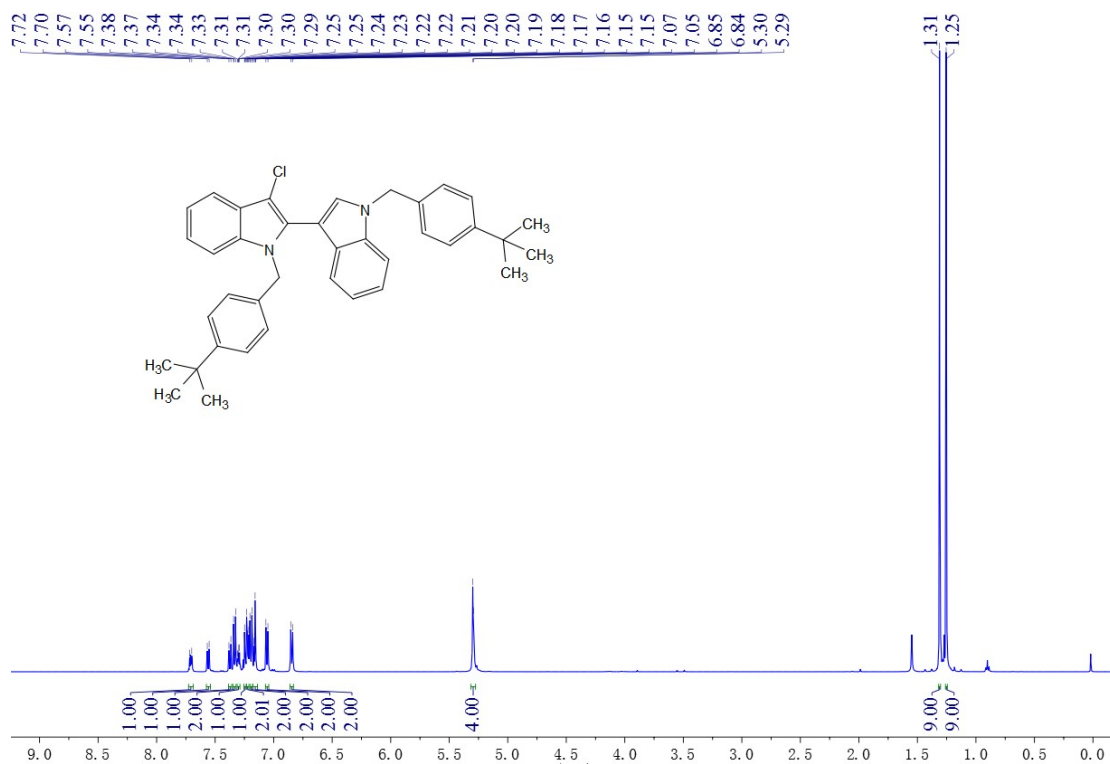

(57) <sup>13</sup>C-NMR (125 MHz, CDCl<sub>3</sub>) spectrum of B26

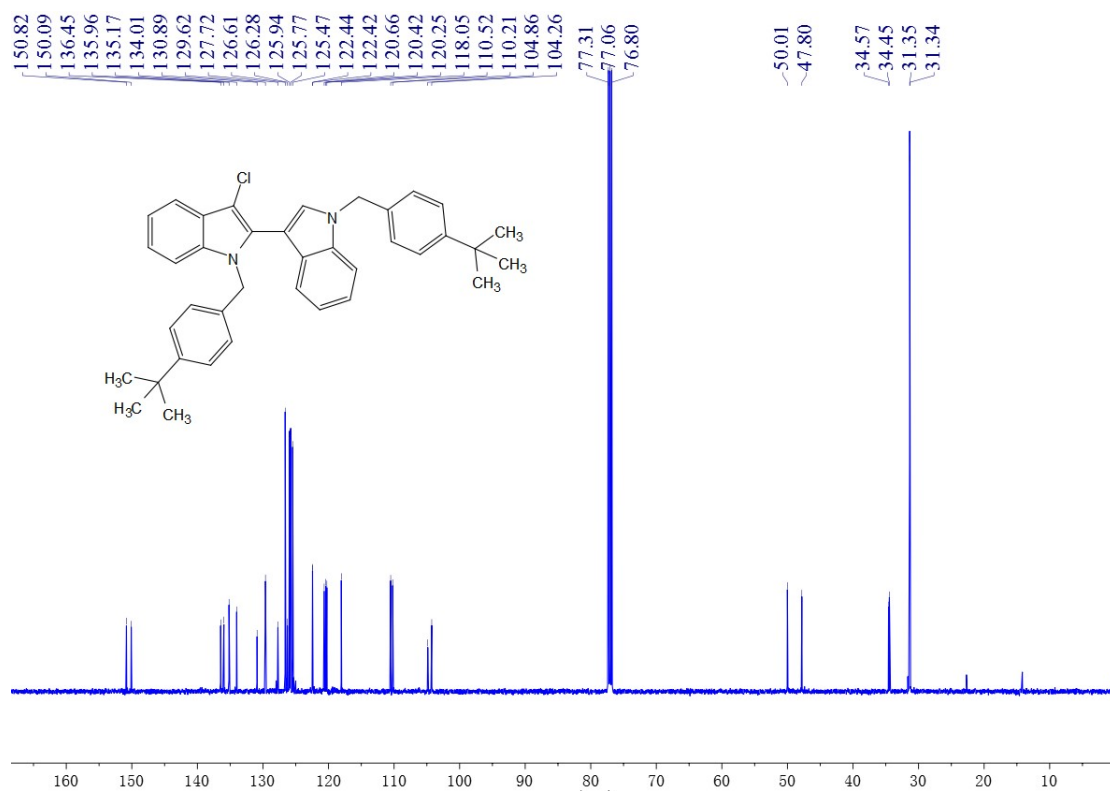

(58) <sup>1</sup>H-NMR (500 MHz, CDCl<sub>3</sub>) spectrum of B27

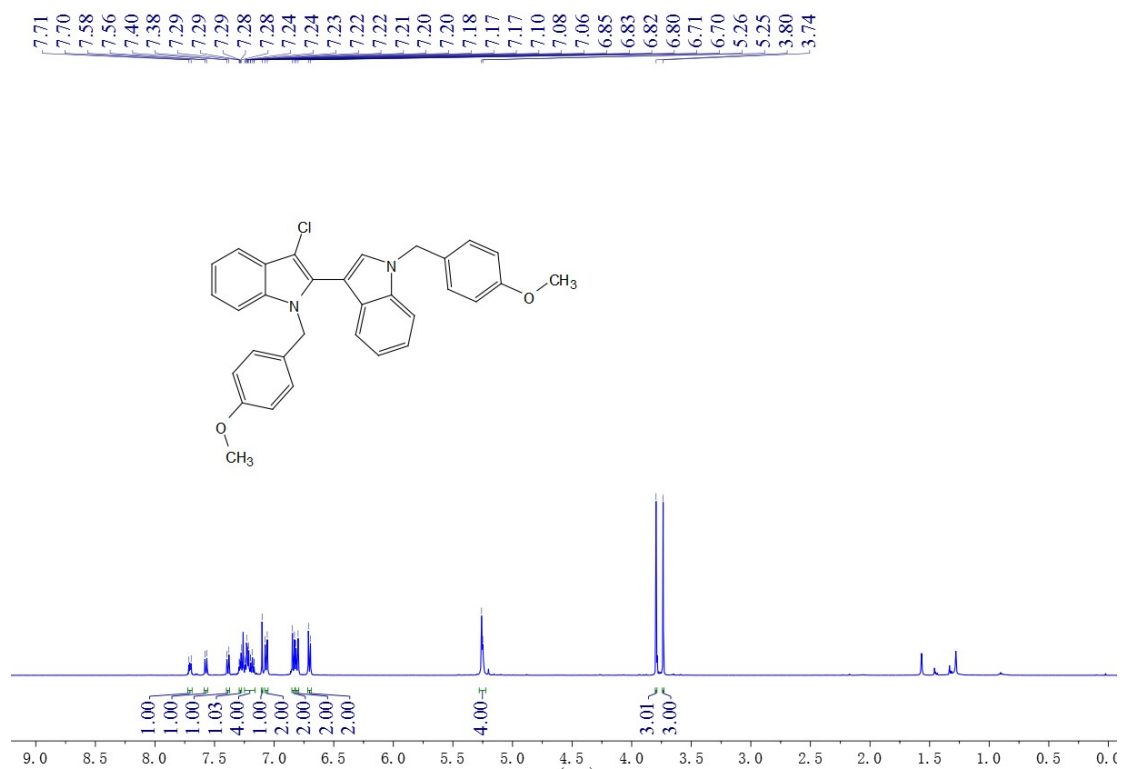

**(59)  $^{13}\text{C}$ -NMR (125 MHz,  $\text{CDCl}_3$ ) spectrum of B27**

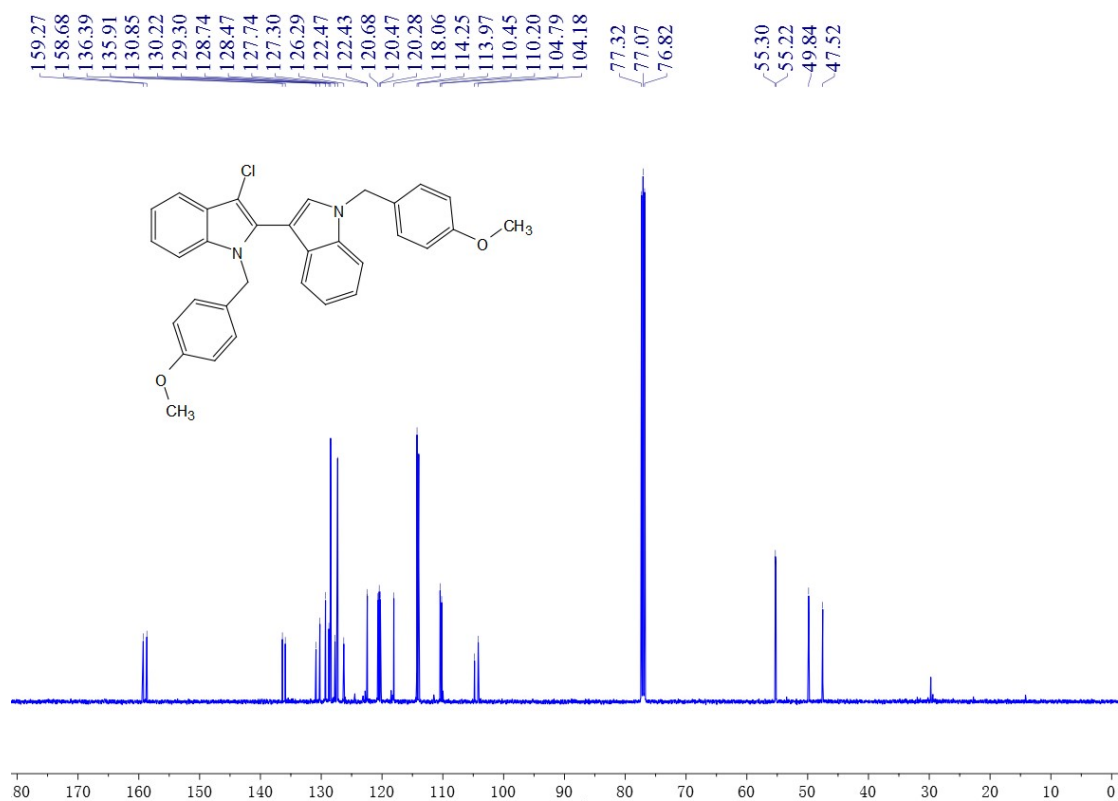

**(60)  $^1\text{H}$ -NMR (500 MHz,  $\text{CDCl}_3$ ) spectrum of B28**

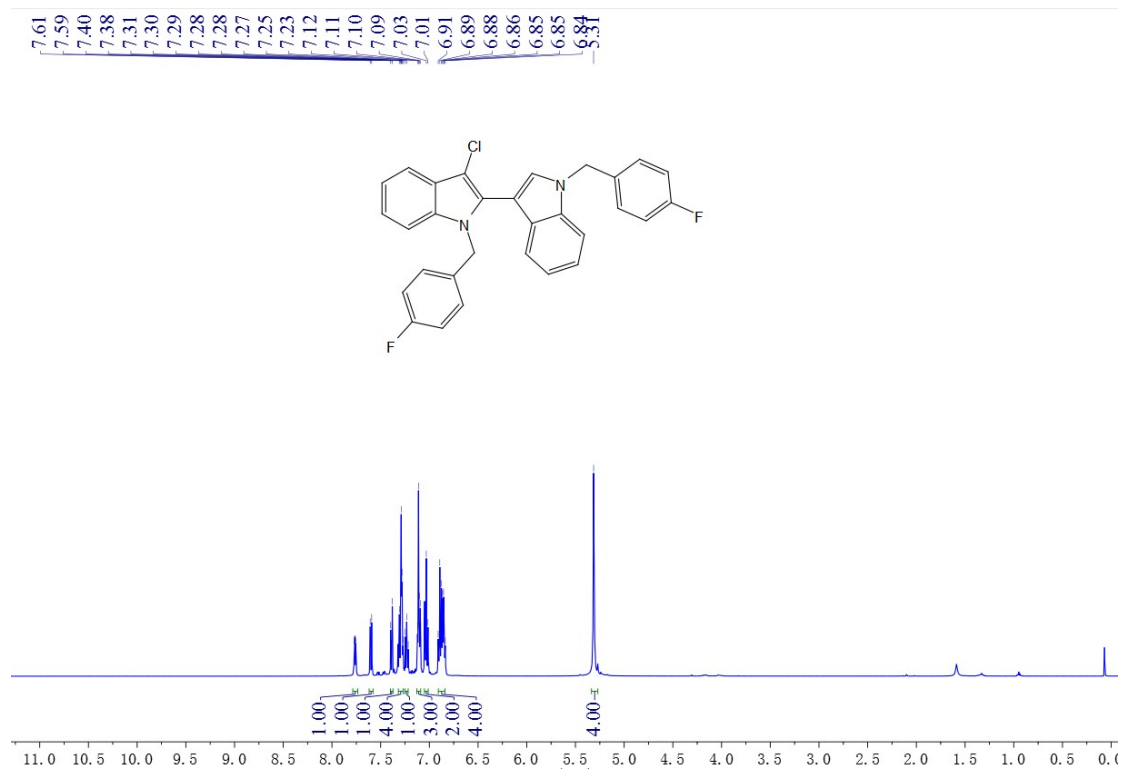

(61)  $^{13}\text{C}$ -NMR (125 MHz,  $\text{CDCl}_3$ ) spectrum of B28

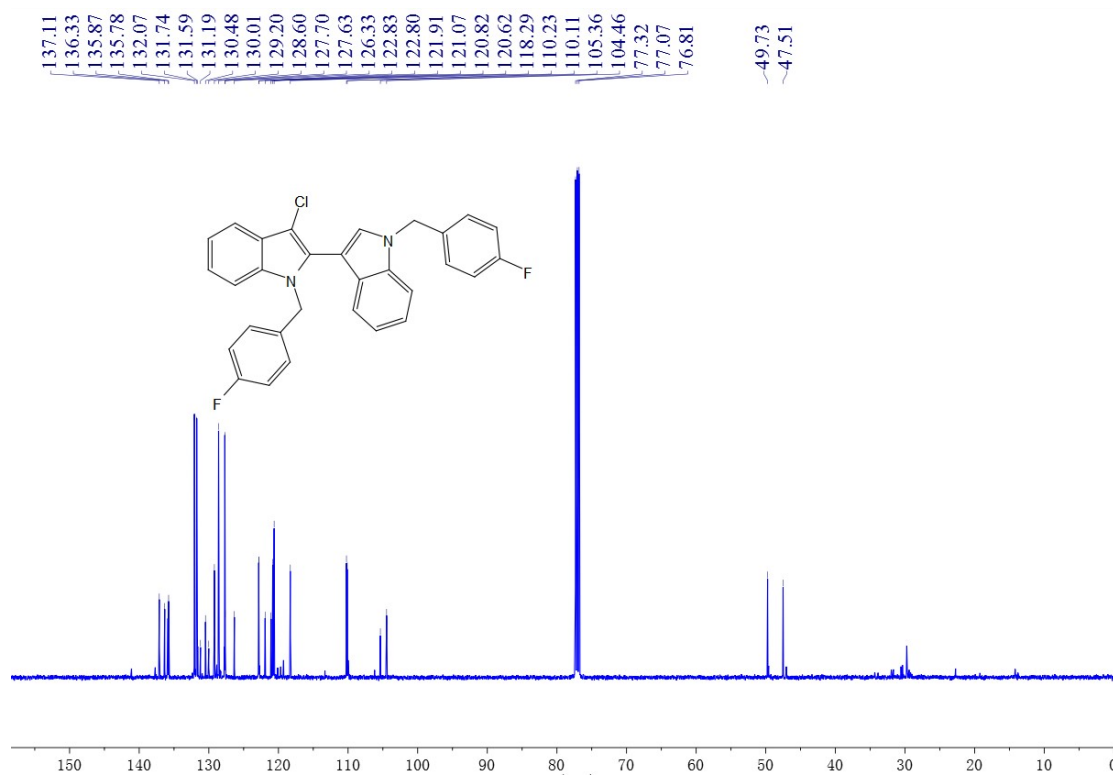

(62)  $^{19}\text{F}$ -NMR (471 MHz,  $\text{CDCl}_3$ ) spectrum of B28

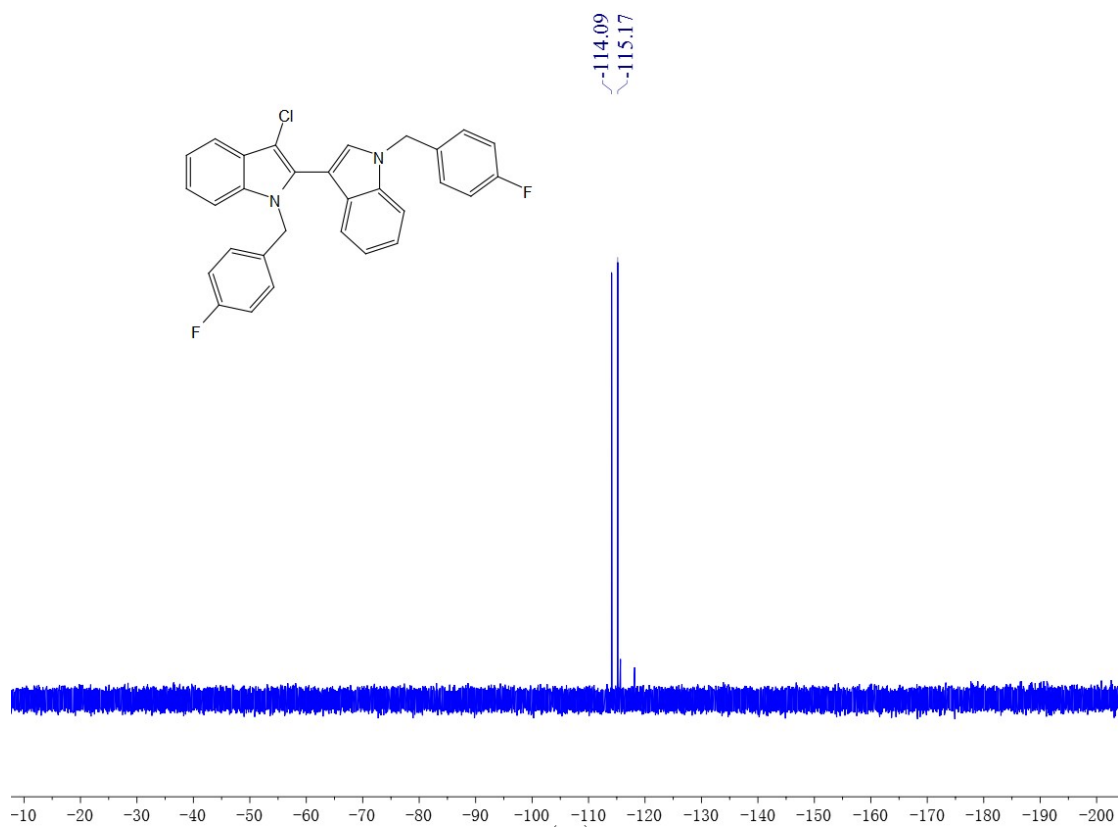

**(63)  $^1\text{H-NMR}$  (500 MHz,  $\text{CDCl}_3$ ) spectrum of B29**

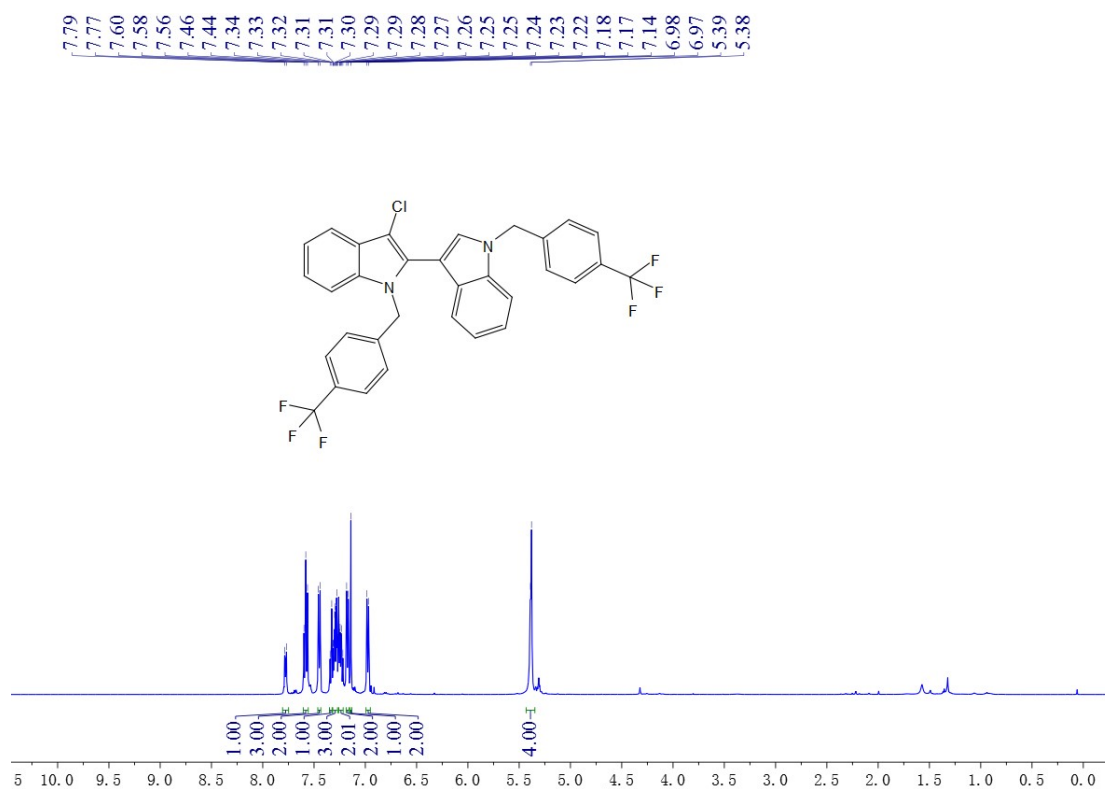

**(64)  $^{13}\text{C-NMR}$  (125 MHz,  $\text{CDCl}_3$ ) spectrum of B29**

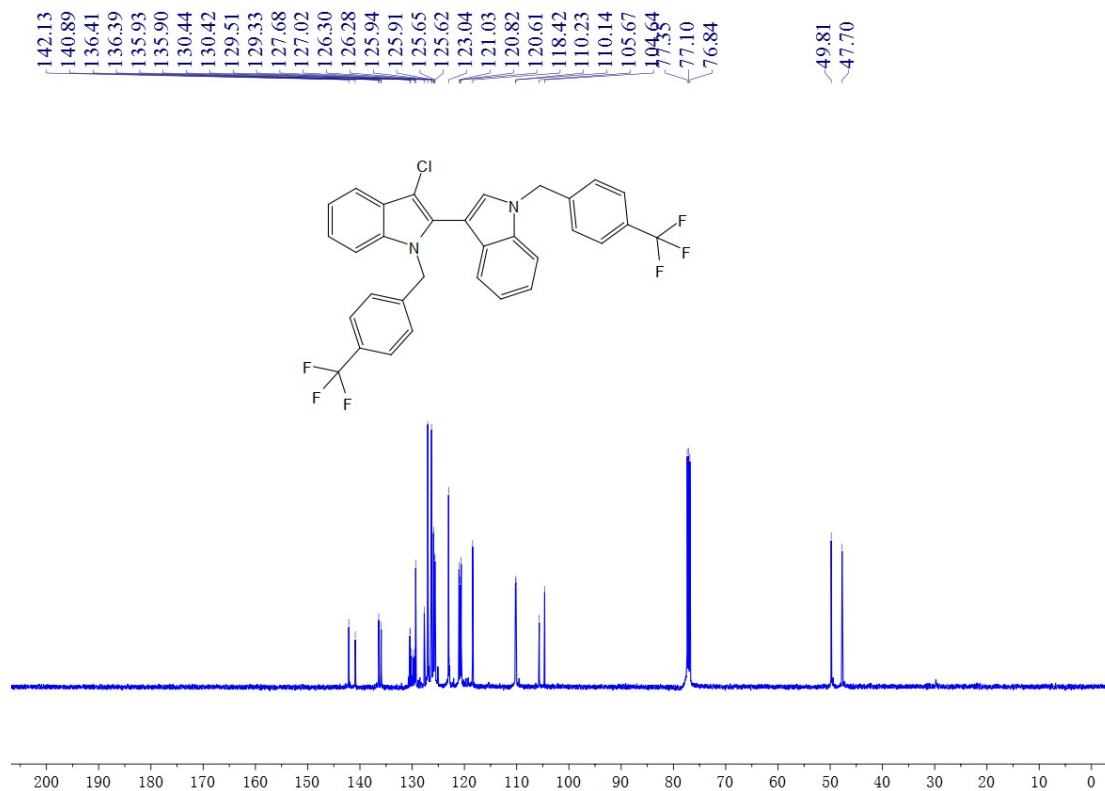

(65)  $^{19}\text{F}$ -NMR (471 MHz,  $\text{CDCl}_3$ ) spectrum of B29

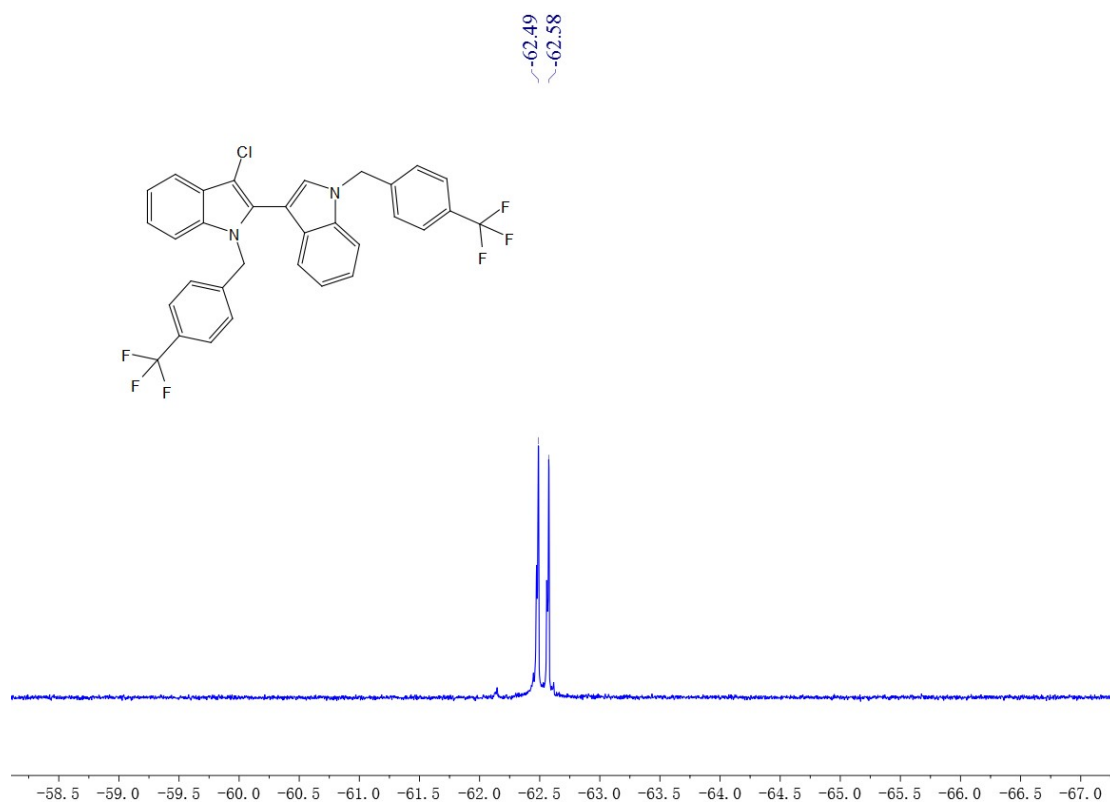



**(66)  $^1\text{H-NMR}$  (500 MHz,  $\text{CDCl}_3$ ) spectrum of B30**

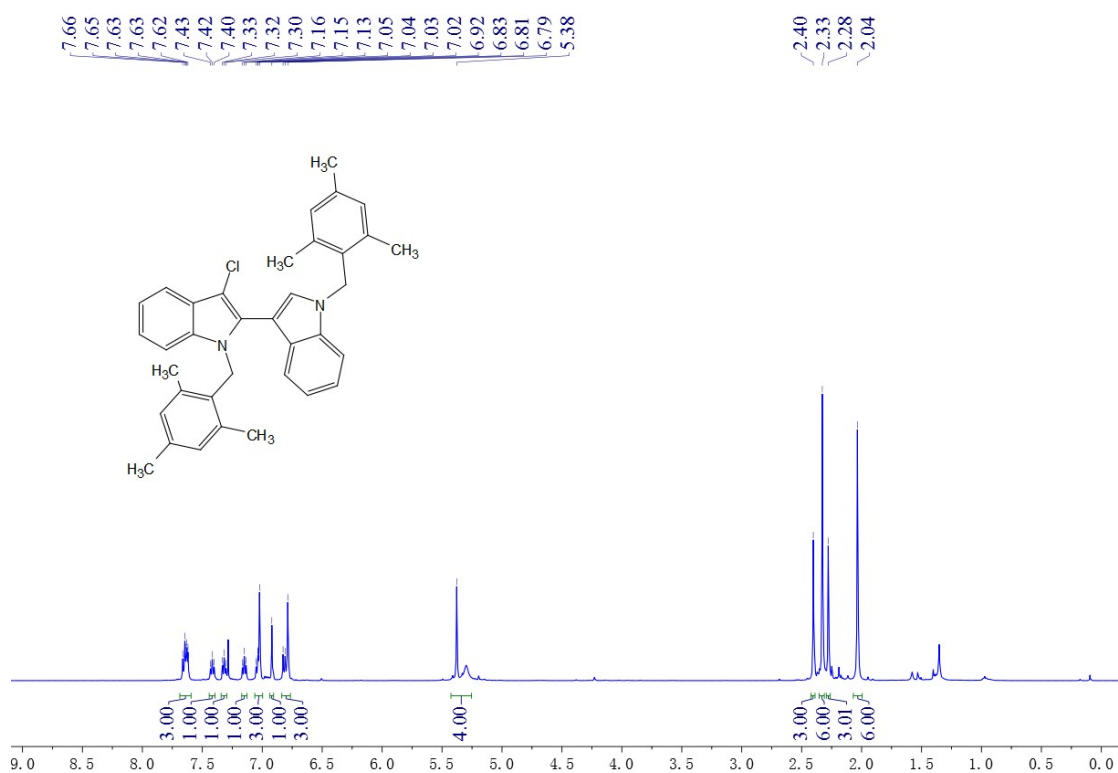

**(67)  $^{13}\text{C-NMR}$  (125 MHz,  $\text{CDCl}_3$ ) spectrum of B30**

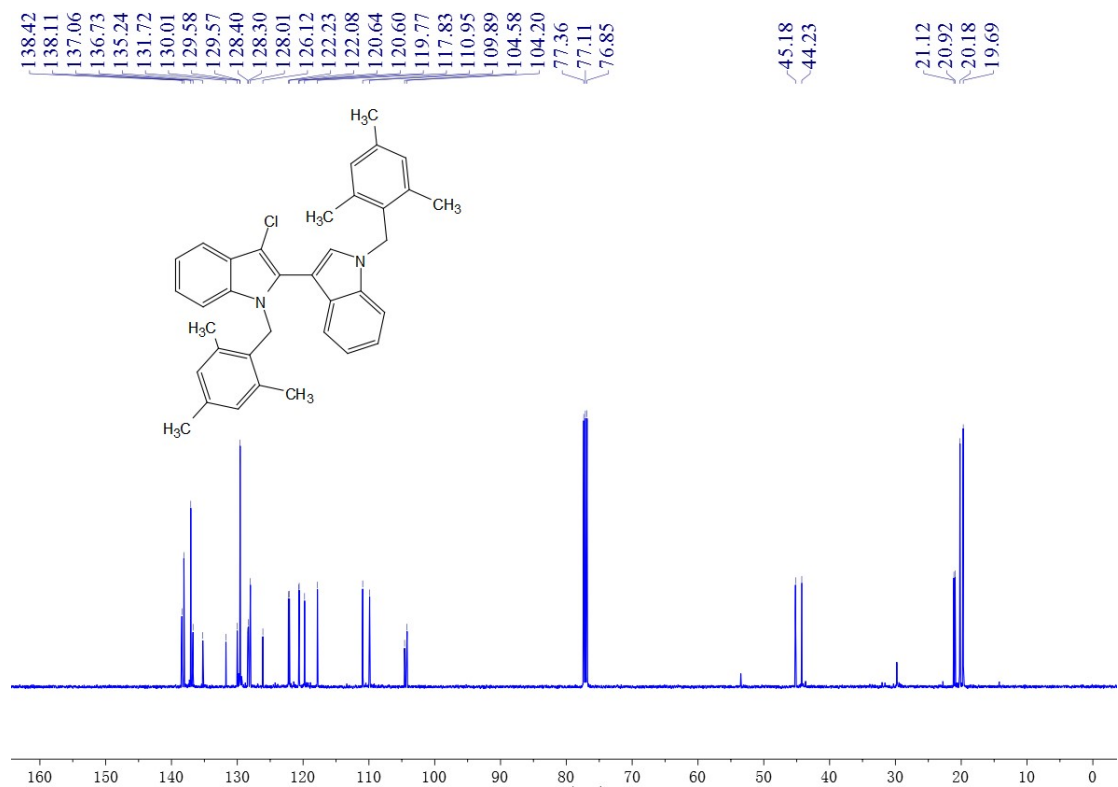

**(68)  $^1\text{H-NMR}$  (500 MHz,  $\text{CDCl}_3$ ) spectrum of B31**

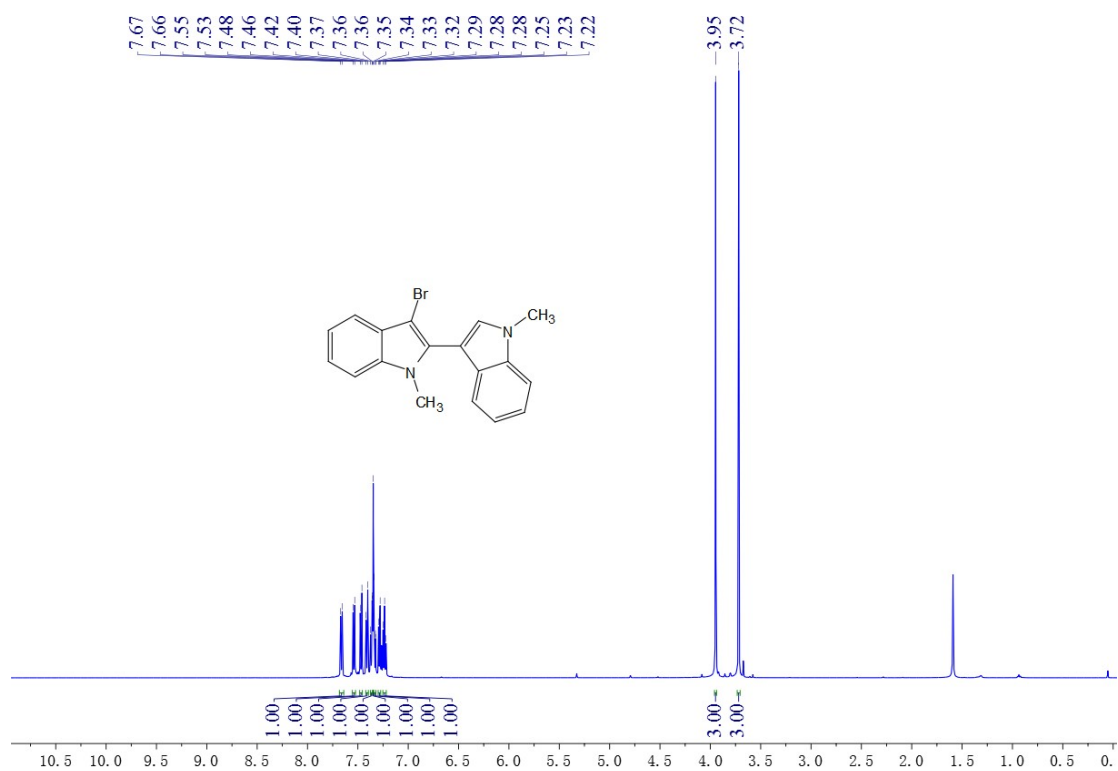

**(69)  $^{13}\text{C-NMR}$  (125 MHz,  $\text{CDCl}_3$ ) spectrum of B31**

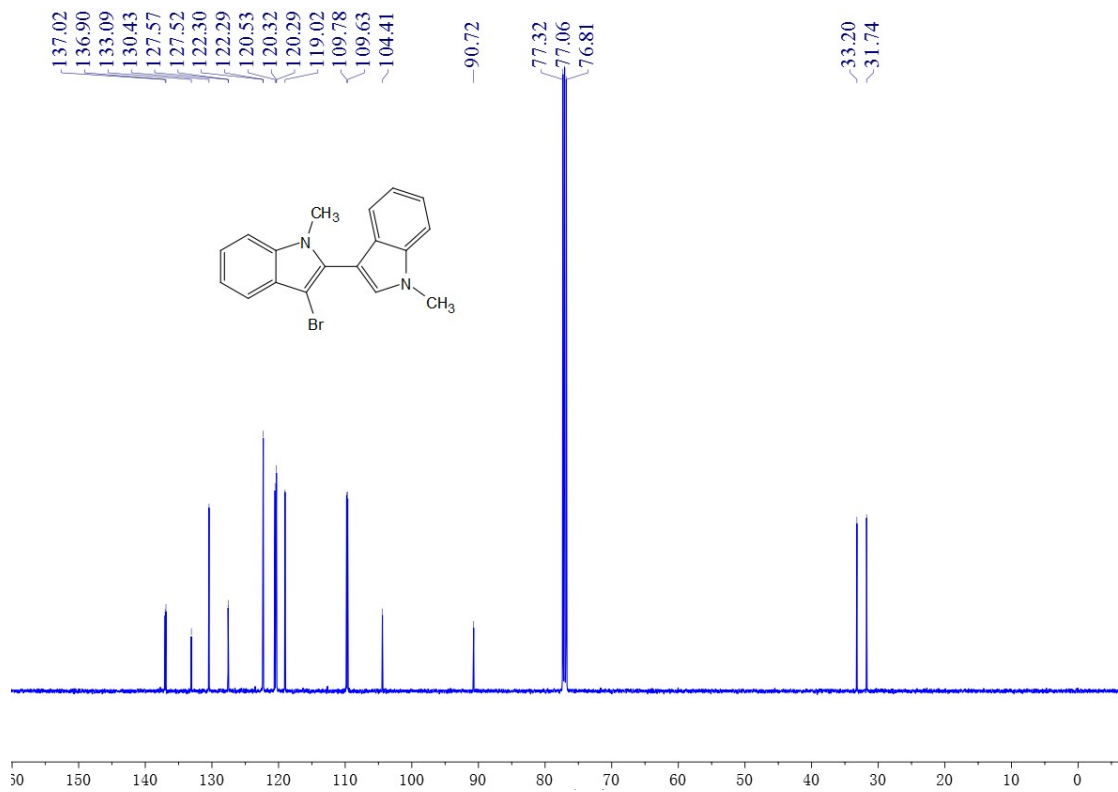

**(70)  $^1\text{H-NMR}$  (500 MHz,  $\text{CDCl}_3$ ) spectrum of B33**

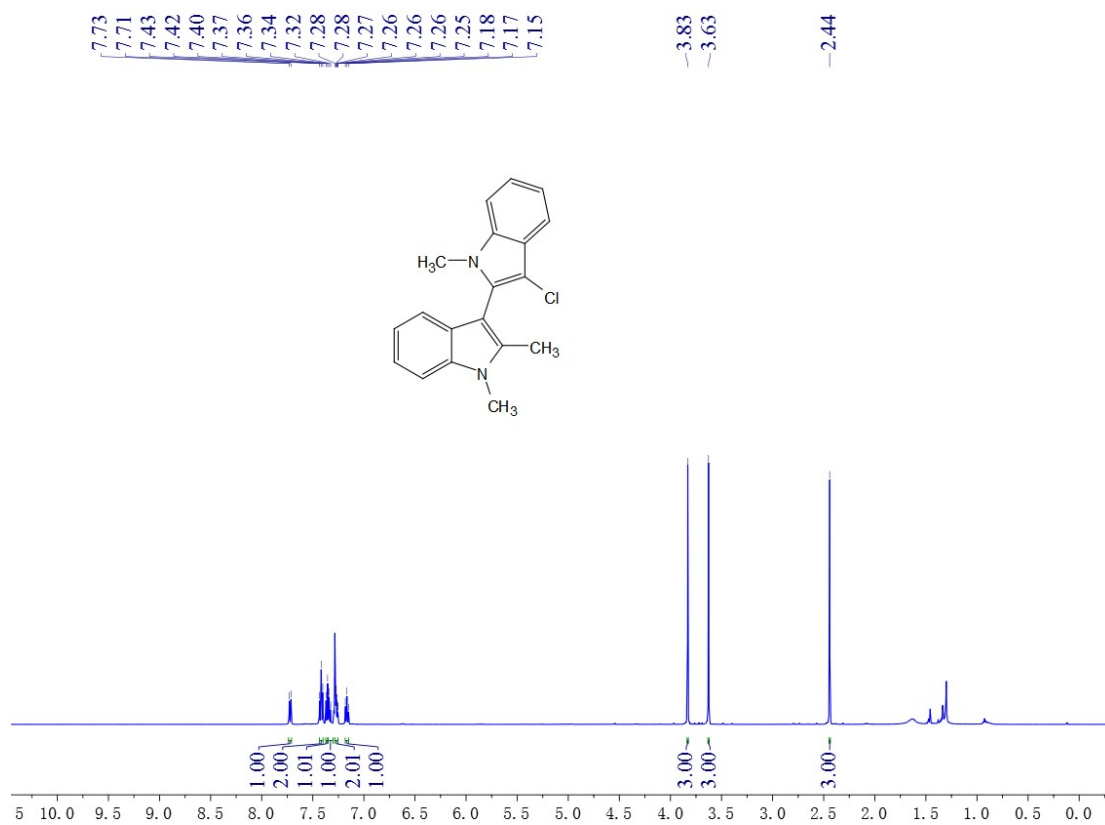

**(71)  $^{13}\text{C-NMR}$  (125 MHz,  $\text{CDCl}_3$ ) spectrum of B33**

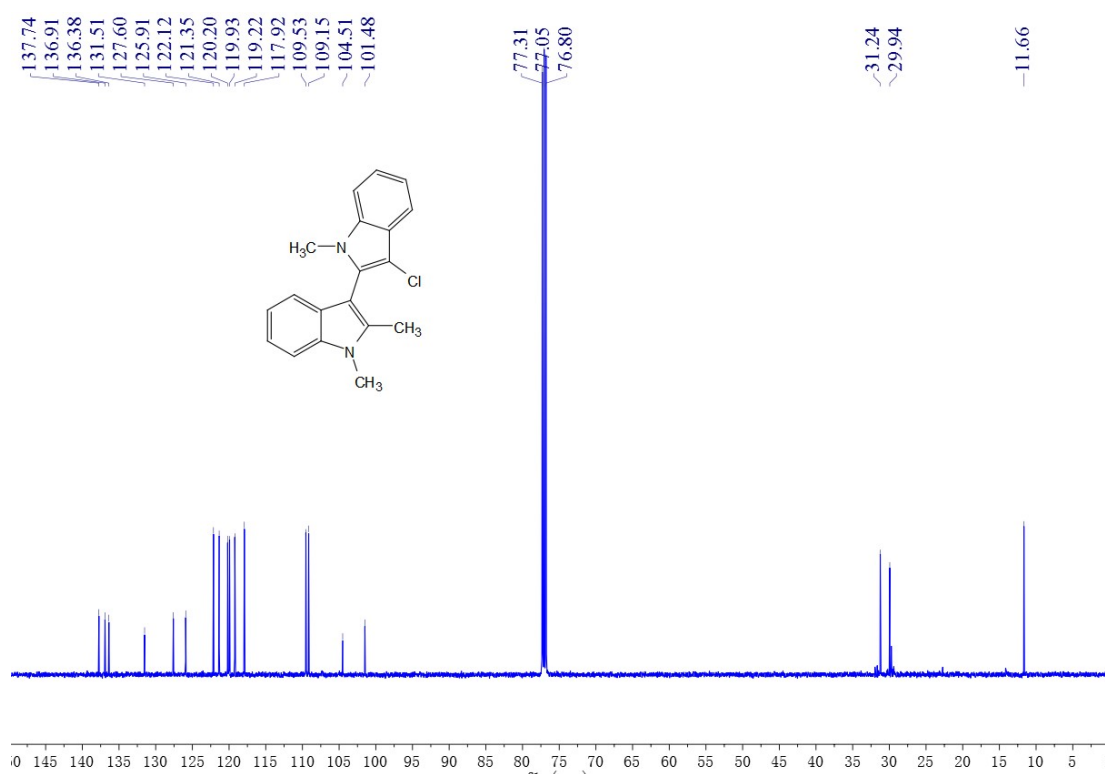

**(72)  $^1\text{H-NMR}$  (500 MHz,  $\text{CDCl}_3$ ) spectrum of B34**

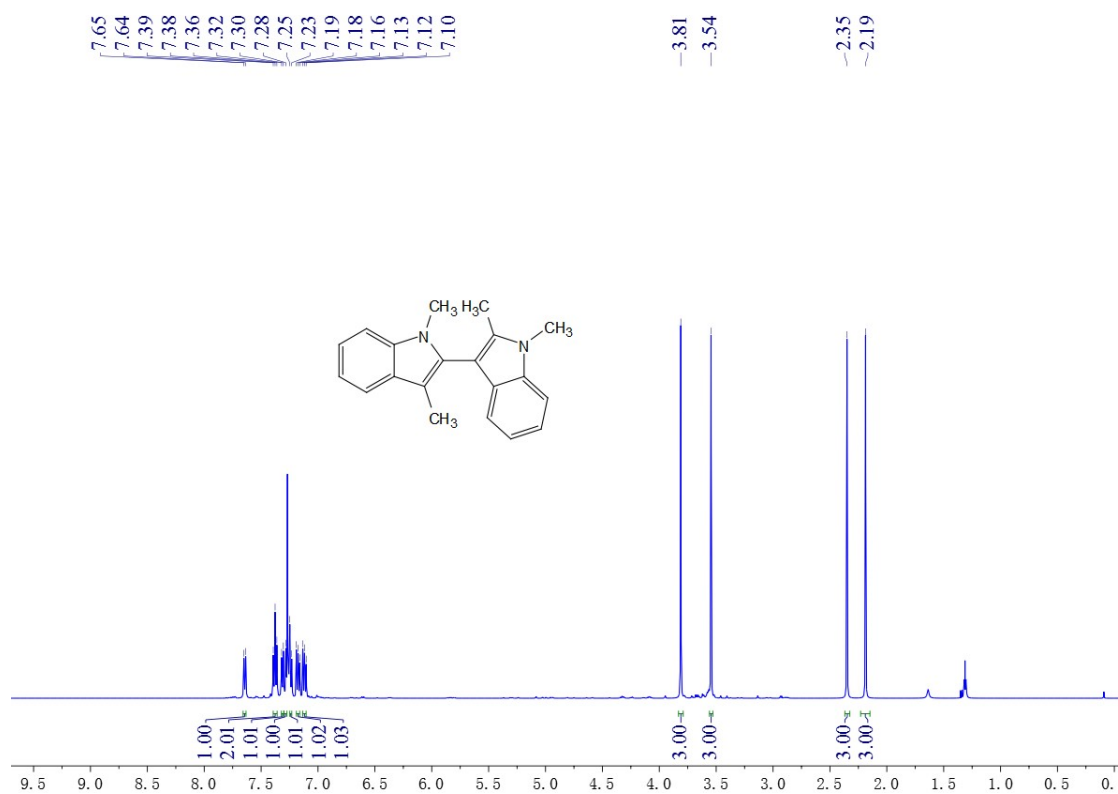

**(73)  $^{13}\text{C-NMR}$  (125 MHz,  $\text{CDCl}_3$ ) spectrum of B34**

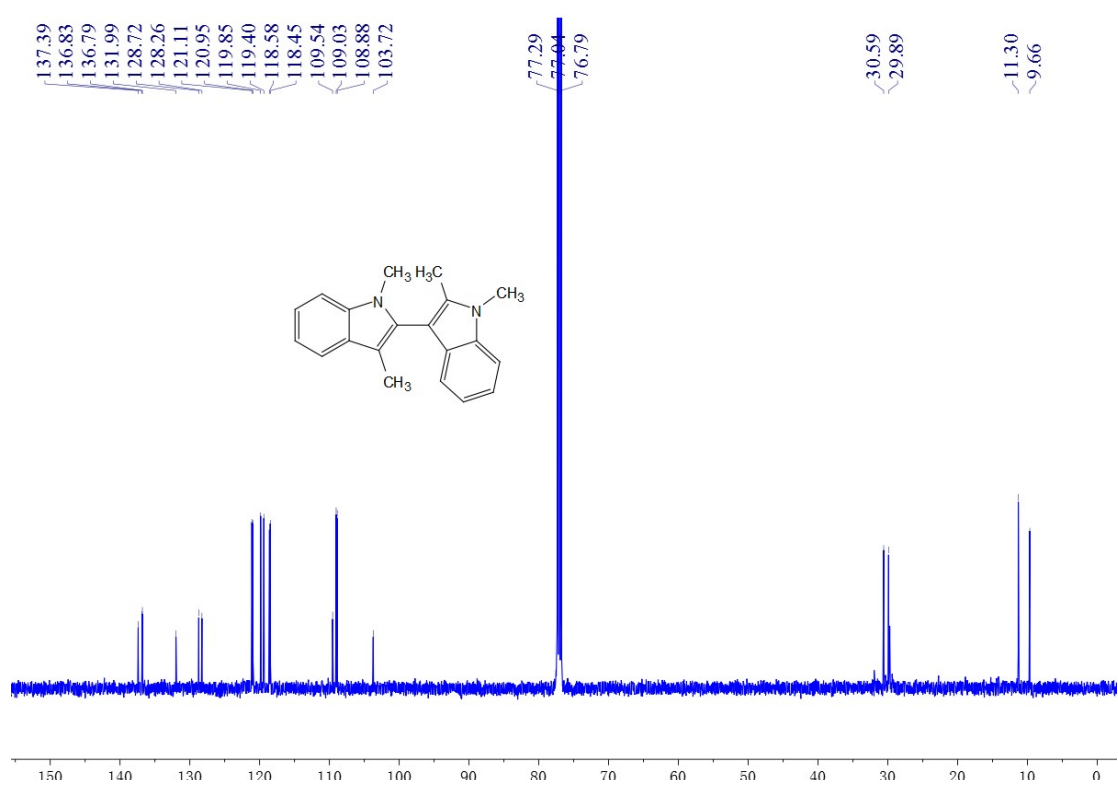

**(74)  $^1\text{H-NMR}$  (500 MHz,  $\text{CDCl}_3$ ) spectrum of F**

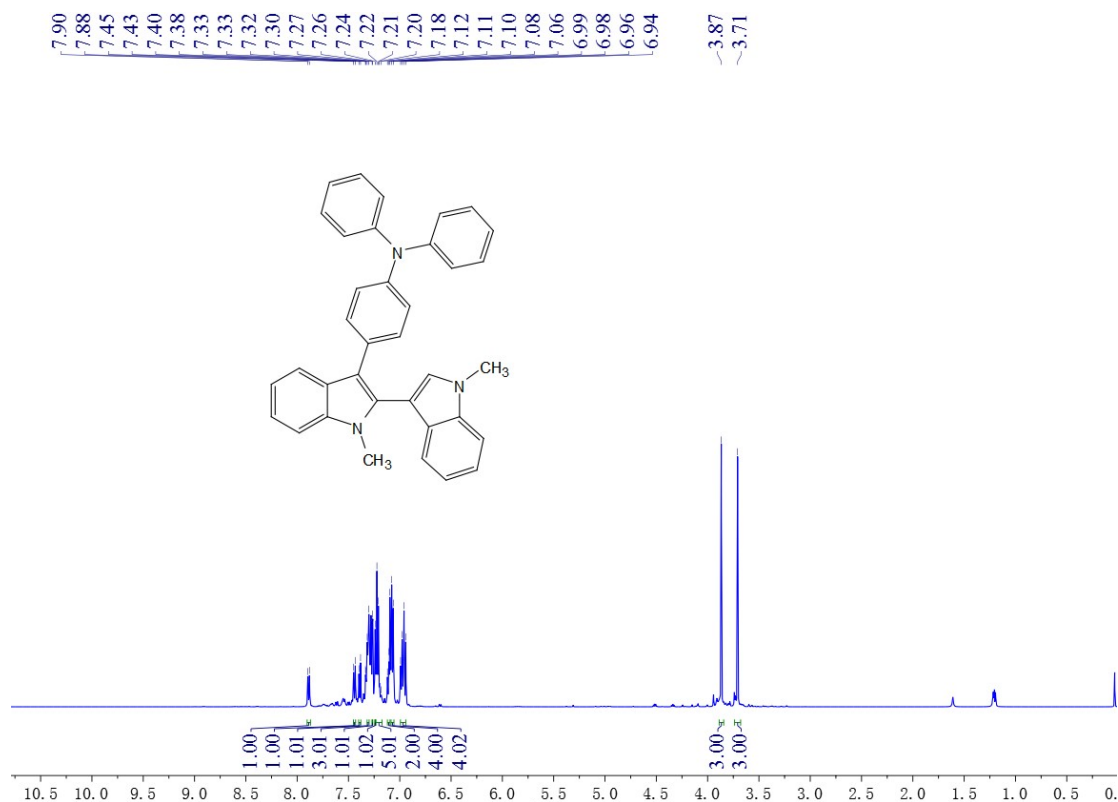

**(75)  $^{13}\text{C-NMR}$  (125 MHz,  $\text{CDCl}_3$ ) spectrum of F**

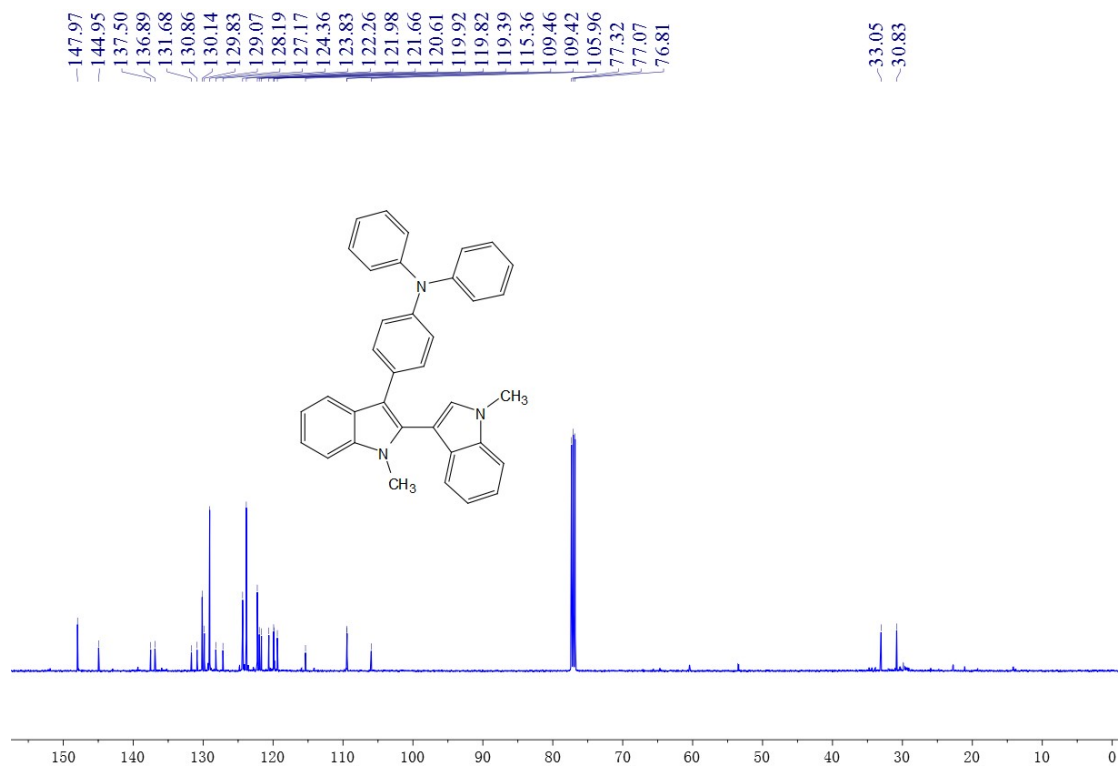

Supplement: d1ob02024b1.pdf [file d1ob02024b1.pdf]
